# Supplementary material for: Ring-expansion from tellurophenes to telluropyrans: inhibition of C–Te bond cleavages in transition metal-catalyzed reactions
Source: Royal Society of Chemistry journal article supplement (doi:10.1039/d2qo01732f), 2022-11-22
Supplement: d2qo01732f1.pdf [file d2qo01732f1.pdf]

Supporting Information For

**Ring-expansion from Tellurophenes to Telluopyrans:  
Inhibition of C-Te Bond Cleavages in Transition Metal-  
Catalyzed Reactions**

Si Liu, Zhanglang Zhou, Jing Fang, Min Wang, Hao Zong, Weinan Chen, Gang Zhou\*

Lab of Advanced Materials, State Key Laboratory of Molecular Engineering of  
Polymers, Fudan University, Shanghai 200438, P. R. China.

\*Corresponding author: E-mail: zhougang@fudan.edu.cn.

## Table of Contents

|                                                      |      |
|------------------------------------------------------|------|
| 1. Materials and reagents.....                       | S3   |
| 2. Characterizations.....                            | S3   |
| 3. Synthesis procedures.....                         | S3   |
| 4. X-ray crystallographic data.....                  | S18  |
| 5. Density functional theory calculations.....       | S26  |
| 6. $^1\text{H}$ and $^{13}\text{C}$ NMR spectra..... | S97  |
| 7. References.....                                   | S122 |

## Experimental Section

### 1. Materials and reagents.

All chemicals and reagents were purchased from commercial sources and were used without further purification unless otherwise specified. Anhydrous tetrahydrofuran (THF) and toluene were distilled from sodium benzophenone ketyl. *N,N*-dimethylformamide (DMF) was distilled from CaH<sub>2</sub>. Synthesis of bis[tris(pentafluorophenyl)phosphine]platinum(II) dichloride/bromide<sup>S1</sup> and 2-alkynyl-1-tellurophenyl substituted aromatics<sup>S2</sup> were followed the previously reported methods. All reactions and manipulations were carried out with the use of standard inert atmosphere and Schlenk techniques.

### 2. Characterizations.

<sup>1</sup>H NMR (400 MHz) and <sup>13</sup>C NMR (100 MHz) spectra were measured on a Varian Mercury Plus-400 spectrometer. The splitting patterns are designated as follows: s (singlet); d (doublet); t (triplet); m (multiplet). HRMS (High-resolution mass spectra) were recorded on an Agilent QTOF-6550 spectrometer using ESI for ionization. The single crystals suitable for X-ray analysis were obtained by the slow solvent volatilization method. The X-ray measurement of single crystals was recorded on a Bruker Sc XRD D8 venture.

### 3. Synthetic procedures.

#### Synthesis of 1,6-bis(3-chloro-2-octylcyclopenta[*a*]-1-naphthalenylydene)hexa-2,4-diene (2a).

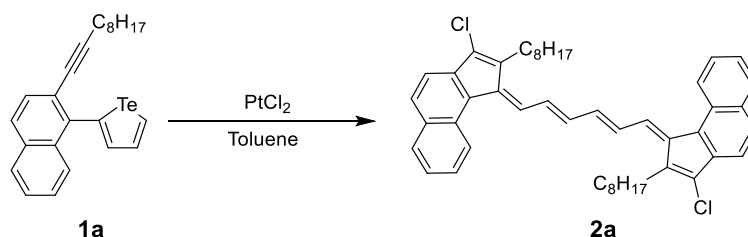

Under nitrogen atmosphere, a mixture of **1** (168 mg, 0.38 mmol) and PtCl<sub>2</sub> (10 mg,

0.038 mmol, 10 mol%) in dry toluene (5 mL) was stirred at 110 °C overnight. After cooling to room temperature, the reaction mixture was filtered and concentrated under reduced pressure. The crude product was purified using column chromatography on silica gel (eluent: DCM : PE = 1:10) to yield product **2a** (18 mg) as a red solid. The yield is 14% if calculated from compound **1a** while 68% if calculated from PtCl<sub>2</sub>. <sup>1</sup>H NMR (400 MHz, CDCl<sub>3</sub>) δ (ppm): 8.42 (d, *J* = 8.8 Hz, 2H), 7.91-7.85 (m, 4H), 7.76 (d, *J* = 8.0 Hz, 2H), 7.55-7.49 (m, 4H), 7.40-7.33 (m, 4H), 6.99-6.95 (m, 2H), 2.90 (t, *J* = 7.6 Hz, 4H), 1.74-1.67 (m, 4H), 1.56-1.48 (m, 4H), 1.44-1.39 (m, 16H), 0.89-0.88 (m, 6H). <sup>13</sup>C NMR (100 MHz, CDCl<sub>3</sub>). δ (ppm): 141.2, 140.8, 138.0, 135.3, 134.4, 133.8, 132.9, 130.4, 129.6, 129.4, 129.2, 129.1, 127.7, 124.4, 123.3, 117.9, 32.1, 29.8, 29.7, 29.7, 29.7, 29.5, 22.9, 14.3. HRMS (ESI) *m/z*: [M + H]<sup>+</sup> calcd for C<sub>48</sub>H<sub>53</sub>Cl<sub>2</sub> 699.3519 found 699.3529.

### Synthesis of 1,6-bis(3-bromo-2-octylcyclopenta[*a*]-1-naphthalenyldiene)hexa-2,4-diene (**2b**).

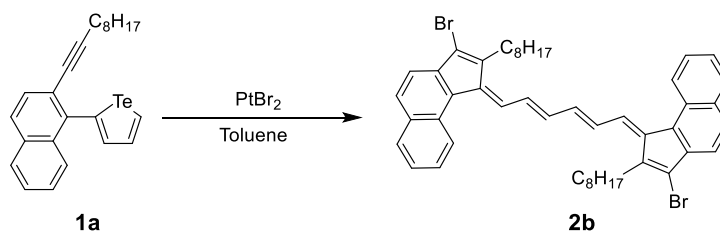

Under nitrogen atmosphere, a mixture of **1** (200 mg, 0.45 mmol) and PtBr<sub>2</sub> (16 mg, 0.045 mmol, 10 mol%) in dry toluene (5 mL) was stirred at 110 °C overnight. After cooling to room temperature, the reaction mixture was filtered and concentrated under reduced pressure. The crude product was purified using column chromatography on silica gel (eluent: DCM : PE = 1:10) to yield product **2b** (27 mg) as a red solid. The yield is 15% if calculated from compound **1a** while 76% if calculated from PtBr<sub>2</sub>. <sup>1</sup>H NMR (400 MHz, CDCl<sub>3</sub>) δ (ppm): 8.41 (d, *J* = 8.8 Hz, 2H), 7.89-7.84 (m, 4H), 7.76 (d, *J* = 8.0 Hz, 2H), 7.54 (t, *J* = 7.6 Hz, 2H), 7.48 (d, *J* = 8.0 Hz, 2H), 7.40-7.31 (m, 4H), 7.02-6.96 (m, 2H), 2.91 (t, *J* = 7.6 Hz, 4H), 1.75-1.69 (m, 4H), 1.56-1.51 (m, 4H), 1.45-

1.25 (m, 16H), 0.89-0.86 (m, 6H).  $^{13}\text{C}$  NMR (100 MHz,  $\text{CDCl}_3$ )  $\delta$  (ppm): 141.4, 141.2, 139.1, 138.5, 134.2, 133.9, 133.1, 130.4, 129.6, 129.4, 129.0, 127.7, 125.4, 124.4, 123.3, 119.3, 32.1, 29.9, 29.9, 29.7, 29.7, 29.5, 22.9, 14.3. HRMS (ESI)  $m/z$ :  $[\text{M} + \text{H}]^+$  calcd for  $\text{C}_{48}\text{H}_{53}\text{Br}_2$  789.2488 found 789.2482.

### General procedure for the synthesis of 3a-3n.

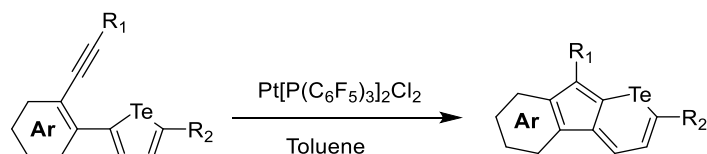

### Scheme S1. Synthetic route for compounds 3a-3n.

To a degassed solution of alkyne precursor 2-alkynyl-1-tellurophenyl substituted aromatics (0.15 mmol) in dry toluene (5 mL) was added Pt[P(C<sub>6</sub>F<sub>5</sub>)<sub>3</sub>]<sub>2</sub>Cl<sub>2</sub> (10 mol% 20 mg, 0.015mmol). The mixture was heated at 110 °C overnight under nitrogen atmosphere and then cooled to room temperature. After removing toluene in vacuo, the product was purified by column chromatography to produce the target product.

### Synthesis of 7-octylbenzo[6,7]indeno[2,1-*b*]telluropyran (3a).

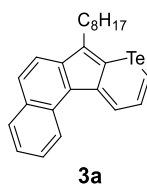

Eluent (PE). Blue solid. 48 mg, 73% yield.  $^1\text{H}$  NMR (400 MHz,  $\text{CDCl}_3$ )  $\delta$  (ppm): 8.68 (d,  $J = 8.4$  Hz, 1H), 8.40 (d,  $J = 4.0$  Hz, 1H), 8.38 (d,  $J = 6.4$  Hz, 1H), 7.96 (d,  $J = 8.4$  Hz, 1H), 7.92 (d,  $J = 8.4$  Hz, 1H), 7.79-7.74 (m, 1H), 7.63 (d,  $J = 8.4$  Hz, 1H), 7.59 (d,  $J = 8.4$  Hz, 1H), 7.41 (t,  $J = 7.6$  Hz, 1H), 2.77 (t,  $J = 7.6$  Hz, 2H), 1.75 (t,  $J = 7.6$  Hz, 2H), 1.45-1.41 (m, 2H), 1.38-1.26 (m, 8H), 0.89-0.86 (m, 3H).  $^{13}\text{C}$  NMR (100 MHz,  $\text{CDCl}_3$ )  $\delta$  (ppm): 141.2, 138.9, 131.1, 130.9, 130.1, 129.4, 128.6, 127.5, 127.4, 127.2,

125.2, 123.4, 123.0, 117.4, 114.4, 107.4, 32.1, 30.3, 30.2, 29.8, 29.5, 27.6, 22.9, 14.3.  
HRMS (ESI)  $m/z$ :  $[M + H]^+$  calcd for  $C_{24}H_{27}Te$  445.1170; found 445.1168.

### Synthesis of 9-cyclopropylindeno[2,1-*b*]telluropyran (3b).

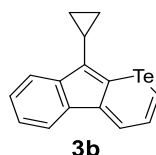

Eluent (PE). Violet solid. 29 mg, 61% yield.  $^1H$  NMR (400 MHz,  $CDCl_3$ ) : 8.15-8.12 (m, 1H), 7.98 (d,  $J = 7.6$  Hz, 1H), 7.61 (d,  $J = 7.6$  Hz, 1H), 7.57-7.53 (m, 2H), 7.49 (t,  $J = 7.2$  Hz, 1H), 7.24 (t,  $J = 7.2$  Hz, 1H), 1.83-1.78 (m, 1H), 1.05-1.00 (m, 2H), 0.79-0.74 (m, 2H).  $^{13}C$  NMR (100 MHz,  $CDCl_3$ )  $\delta$  (ppm): 142.2, 138.2, 135.2, 130.5, 129.3, 127.6, 126.9, 122.6, 121.7, 119.9, 116.9, 114.1, 10.2, 5.0. HRMS (ESI)  $m/z$ :  $[M]^+$  calcd for  $C_{15}H_{12}Te$  322.0001 found 321.9987.

### Synthesis of 7-(*tert*-butyl)benzo[6,7]indeno[2,1-*b*]telluropyran (3c).

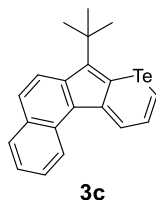

Eluent (PE). Violet solid. 5 mg, 8% yield.  $^1H$  NMR (400 MHz,  $CDCl_3$ )  $\delta$  (ppm): 8.69 (d,  $J = 8.8$  Hz, 1H), 8.46 (d,  $J = 8.0$  Hz, 1H), 8.31 (d,  $J = 10.0$  Hz, 1H), 8.01 (d,  $J = 8.8$  Hz, 1H), 7.95 (d,  $J = 8.0$  Hz, 1H), 7.86 (d,  $J = 8.8$  Hz, 1H), 7.76 (t,  $J = 8.0$  Hz, 1H), 7.59 (t,  $J = 7.6$  Hz, 1H), 7.42 (t,  $J = 7.6$  Hz, 1H), 1.69 (s, 9H).  $^{13}C$  NMR (100 MHz,  $CDCl_3$ )  $\delta$  (ppm): 131.9, 130.5, 129.9, 129.7, 128.8, 128.2, 128.1, 127.3, 127.1, 126.8, 123.6, 123.3, 123.0, 120.5, 119.8, 118.1, 31.1, 29.6. HRMS (ESI)  $m/z$ :  $[M + H]^+$  calcd for  $C_{20}H_{19}Te$  389.0543; found 389.0536.

### Synthesis of 9-phenylindeno[2,1-*b*]telluropyran (3d).

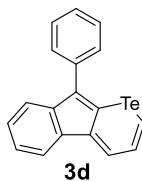

Eluent (PE). Violet solid. 44 mg, 82% yield.  $^1\text{H}$  NMR (400 MHz,  $\text{CDCl}_3$ )  $\delta$  (ppm): 8.14(d,  $J = 10.4$  Hz, 1H), 8.10 (d,  $J = 7.6$  Hz, 1H), 7.70 (t,  $J = 6.8$  Hz, 3H), 7.63 (d,  $J = 7.6$  Hz, 1H), 7.59-7.46 (m, 4H), 7.38 (t,  $J = 7.2$  Hz, 1H), 7.29 (t,  $J = 7.2$  Hz, 1H).  $^{13}\text{C}$  NMR (100 MHz,  $\text{CDCl}_3$ )  $\delta$  (ppm): 141.0, 137.8, 135.7, 131.5, 129.7, 129.4, 128.0, 127.7, 127.4, 126.9, 124.6, 122.3, 120.5, 117.9, 117.4, 113.9. HRMS (ESI)  $m/z$ :  $[\text{M} + \text{H}]^+$  calcd for  $\text{C}_{18}\text{H}_{13}\text{Te}$  359.0074; found 359.0069.

### Synthesis of 2-(9-indeno[2,1-*b*]telluropyranyl)thiophene (3e).

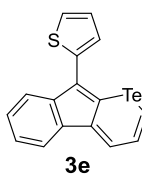

Eluent (PE). Violet solid. 41 mg, 76% yield.  $^1\text{H}$  NMR (400 MHz,  $\text{CDCl}_3$ )  $\delta$  (ppm): 8.24 (d,  $J = 10.4$  Hz, 1H), 8.07 (d,  $J = 7.6$  Hz, 1H), 7.95 (d,  $J = 7.6$  Hz, 1H), 7.73 (d,  $J = 7.6$  Hz, 1H), 7.65-7.60 (m, 1H), 7.56-7.52 (m, 2H), 7.43 (d,  $J = 4.8$  Hz, 1H), 7.32 (t,  $J = 7.2$  Hz, 1H), 7.26-7.24 (m, 1H).  $^{13}\text{C}$  NMR (100 MHz,  $\text{CDCl}_3$ )  $\delta$  (ppm): 140.4, 140.2, 135.9, 131.7, 131.7, 128.7, 128.1, 128.1, 127.5, 124.8, 124.4, 123.5, 122.6, 120.3, 117.9, 116.0. HRMS (ESI)  $m/z$ :  $[\text{M}]^+$  calcd for  $\text{C}_{16}\text{H}_{10}\text{STe}$  363.9565; found 363.9551.

### Synthesis of 3-(9-indeno[2,1-*b*]telluropyranyl)thiophene (3f).

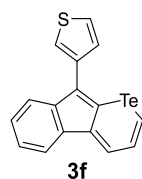

Eluent (PE). Violet solid. 38 mg, 71% yield.  $^1\text{H}$  NMR (400 MHz,  $\text{CDCl}_3$ )  $\delta$  (ppm): 8.15 (d,  $J = 10.0$  Hz, 1H), 8.06 (d,  $J = 7.2$  Hz, 1H), 7.68 (d,  $J = 7.6$  Hz, 2H), 7.63-7.57 (m, 2H), 7.55-7.47 (m, 2H), 7.31-7.26 (m, 2H).  $^{13}\text{C}$  NMR (100 MHz,  $\text{CDCl}_3$ )  $\delta$  (ppm): 141.1, 138.5, 135.6, 134.0, 131.5, 128.1, 127.4, 126.6, 126.4, 124.3, 122.3, 121.7, 120.4, 117.5, 114.2, 109.9. HRMS (ESI)  $m/z$ :  $[\text{M}]^+$  calcd for  $\text{C}_{16}\text{H}_{10}\text{STe}$  363.9565; found 363.9548.

### Synthesis of 9-(4-fluorophenyl)indeno[2,1-*b*]telluropyran (3g).

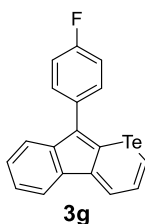

Eluent (PE). Violet solid. 48 mg, 85% yield.  $^1\text{H}$  NMR (400 MHz,  $\text{CDCl}_3$ )  $\delta$  (ppm): 8.11 (d,  $J = 10.0$  Hz, 1H), 8.07 (d,  $J = 7.2$  Hz, 1H), 7.70-7.67 (m, 3H), 7.58-7.54 (m, 2H), 7.48 (t,  $J = 7.6$  Hz, 1H), 7.30 (t,  $J = 7.2$  Hz, 1H), 7.22 (t,  $J = 8.4$  Hz, 2H).  $^{13}\text{C}$  NMR (100 MHz,  $\text{CDCl}_3$ )  $\delta$  (ppm): 160.7, 141.0, 137.5, 133.7 (d,  $J = 3.7$  Hz, 1C), 131.4, 128.7, 128.6, 128.1, 127.4, 124.7, 122.3, 120.6, 117.2, 116.5, 116.3, 113.8. HRMS (ESI)  $m/z$ :  $[\text{M} + \text{H}]^+$  calcd for  $\text{C}_{18}\text{H}_{12}\text{FTe}$  376.9980; found 376.9953.

### Synthesis of 9-(4-methoxyphenyl)indeno[2,1-*b*]telluropyran (3h).

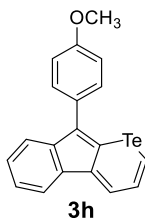

Eluent (DCM : PE = 1:15). Violet solid. 47 mg, 81% yield.  $^1\text{H}$  NMR (400 MHz,  $\text{CDCl}_3$ )  $\delta$  (ppm): 8.08-8.04 (m, 2H), 7.67-7.59 (m, 4H), 7.56-7.51 (m, 1H), 7.47 (t,  $J = 7.6$  Hz, 1H), 7.28 (t,  $J = 7.2$  Hz, 1H), 7.07 (d,  $J = 8.4$  Hz, 2H), 3.89 (s, 3H).  $^{13}\text{C}$  NMR (100 MHz,  $\text{CDCl}_3$ )  $\delta$  (ppm): 159.0, 144.2, 131.6, 130.1, 128.2, 127.9, 127.4, 125.0, 125.0,



124.1, 122.2, 120.4, 119.0, 117.4, 114.8, 113.3, 55.6. HRMS (ESI)  $m/z$ :  $[M]^+$  calcd for  $C_{19}H_{14}OTe$  388.0107; found 388.0105.

**Synthesis of 11-(4-methoxyphenyl)benzo[4,5]indeno[2,1-*b*]telluropyran (3i).**

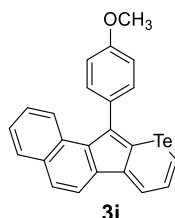

Eluent (DCM : PE = 1:10 ). Blue solid. 42 mg, 64% yield.  $^1H$  NMR (400 MHz,  $CDCl_3$ )  $\delta$  (ppm): 8.45 (d,  $J = 10.0$  Hz, 1H), 8.19 (d,  $J = 8.4$  Hz, 1H), 7.97-7.91 (m, 3H), 7.75-7.70 (m, 2H), 7.52-7.48 (m, 2H), 7.43 (t,  $J = 6.8$  Hz, 1H), 7.29-7.25(m, 1H), 7.13-7.09 (m, 2H), 3.95 (s, 3H).  $^{13}C$  NMR (100 MHz,  $CDCl_3$ ) 159.3, 139.4, 137.0, 134.6, 132.9, 132.0, 131.5, 130.0, 129.7, 128.8, 127.2, 126.7, 126.4, 125.4, 125.3, 122.4, 119.0, 117.9, 115.1, 113.4, 55.6. HRMS (ESI)  $m/z$ :  $[M + H]^+$  calcd for  $C_{23}H_{17}OTe$  439.0336; found 439.0321.

**Synthesis of 11-octylbenzo[5,6]indeno[2,1-*b*]telluropyran (3j).**

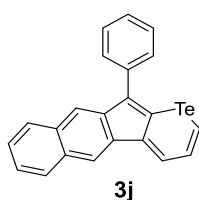

Eluent (PE). Violet solid. 38 mg, 63% yield.  $^1H$  NMR (400 MHz,  $CDCl_3$ )  $\delta$  (ppm): 8.43 (s, 1H), 8.00-7.98 (m, 1H), 7.92-7.89 (m, 2H), 7.81-7.75 (m, 3H), 7.59-7.54 (m, 3H), 7.50-7.41 (m, 4H).  $^{13}C$  NMR (100 MHz,  $CDCl_3$ )  $\delta$  (ppm): 139.6, 139.5, 137.6, 135.3, 133.8, 132.5, 130.0, 129.5, 128.8, 128.7, 128.0, 127.8, 126.9, 126.1, 124.9, 122.0, 119.5, 114.7, 114.6, 110.2. HRMS (ESI)  $m/z$ :  $[M]^+$  calcd for  $C_{22}H_{14}Te$  408.0158; found 408.0156.

### Synthesis of 6-chloro-9-phenylindeno[2,1-*b*]telluropyran (**3k**).

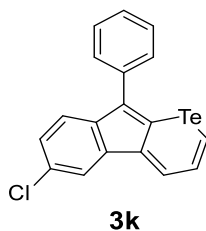

Eluent (PE). Violet solid. 42 mg, 72% yield.  $^1\text{H}$  NMR (400 MHz,  $\text{CDCl}_3$ )  $\delta$  (ppm): 8.24-8.21 (m, 1H), 8.03 (m, 1H), 7.70-7.67 (m, 3H), 7.62-7.58 (m, 1H), 7.57-7.52 (m, 3H), 7.46-7.43 (m, 1H), 7.25-7.39 (m, 1H).  $^{13}\text{C}$  NMR (100 MHz,  $\text{CDCl}_3$ )  $\delta$  (ppm): 139.0, 137.5, 137.2, 136.9, 130.4, 129.3, 128.1, 127.7, 127.6, 127.2, 126.6, 125.4, 120.5, 118.1, 115.4, 110.8. HRMS (ESI)  $m/z$ :  $[\text{M}]^+$  calcd for  $\text{C}_{18}\text{H}_{11}\text{ClTe}$  391.9612; found 391.9596.

### Synthesis of 6-methoxy-9-phenylindeno[2,1-*b*]telluropyran (**3l**).

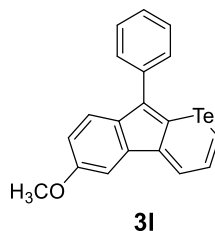

Eluent (DCM : PE = 1:10). Violet solid. 39 mg, 70% yield. (40 mg, 70%).  $^1\text{H}$  NMR (400 MHz,  $\text{CDCl}_3$ )  $\delta$  (ppm) 8.05 (d,  $J = 10.0$  Hz, 1H), 7.70-7.67 (m, 2H), 7.62 (d,  $J = 2.4$  Hz, 1H), 7.86 (d,  $J = 8.0$  Hz, 1H), 7.53-7.47 (m, 4H), 7.36 (t,  $J = 7.2$  Hz 1H), 7.04 (dd,  $J = 8.4, 2.4$  Hz, 1H), 3.92 (s, 3H).  $^{13}\text{C}$  NMR (100 MHz,  $\text{CDCl}_3$ )  $\delta$  (ppm): 162.7, 156.3, 138.4, 137.9, 137.3, 135.0, 131.6, 129.4, 127.6, 127.2, 126.8, 124.3, 118.1, 114.4, 113.6, 106.3, 56.1. HRMS (ESI)  $m/z$ :  $[\text{M}]^+$  calcd for  $\text{C}_{19}\text{H}_{14}\text{OTe}$  388.0107; found 388.0102.

### Synthesis of 2-iodo-9-(4-methoxyphenyl)indeno[2,1-*b*]telluropyran (**3m**).

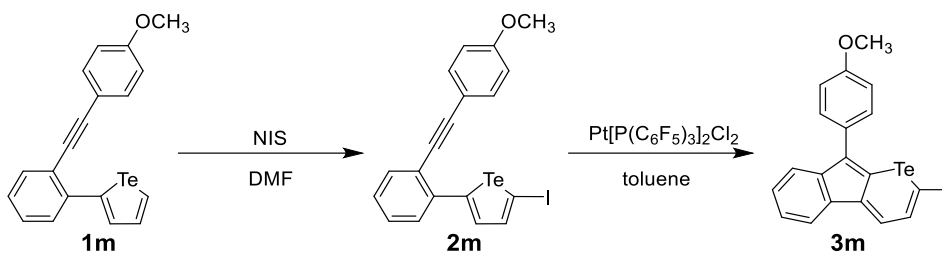

To a solution of **1m** (100 mg, 0.26 mmol) in DMF (5 mL) was added *N*-iodosuccinimide (NIS) (68 mg, 0.3 mmol) in small portions and the mixture was stirred for 12 h at room temperature. Then water was added and the aqueous phase was extracted twice with dichloromethane. The combined organic layer was dried with Na<sub>2</sub>SO<sub>4</sub> and concentrated in vacuum. The crude product was purified by column chromatography (eluent: DCM/PE = 1/10) to get a yellow solid **2m** in 65% yield (86 mg). <sup>1</sup>H NMR (400 MHz, CDCl<sub>3</sub>) δ (ppm): 8.17 (d, *J* = 4.4 Hz, 1H), 7.74 (d, *J* = 8.0 Hz, 1H), 7.67 (d, *J* = 4.8 Hz, 1H), 7.62 (d, *J* = 7.6 Hz, 1H), 7.58-7.55 (m, 2H), 7.36-7.32 (m, 1H), 7.28-7.24 (m, 1H), 6.95-6.94 (m, 2H), 3.86 (s, 3H). <sup>13</sup>C NMR (100 MHz, CDCl<sub>3</sub>) δ (ppm): 160.5, 149.6, 147.2, 140.7, 135.5, 134.2, 133.8, 128.8, 127.2, 125.5, 120.8, 114.8, 114.6, 98.2, 88.6, 74.1, 55.6.

Following the general procedure of the ring-expansion reaction, the crude product was purified using column chromatography on silica gel (eluent: DCM/PE = 1/10) to yield product **3m** (61 mg, 79%) as a violet solid. <sup>1</sup>H NMR (400 MHz, CDCl<sub>3</sub>) δ (ppm): 8.10 (d, *J* = 8.0 Hz, 1H), 7.93 (d, *J* = 7.6 Hz, 1H), 7.56-7.52 (m, 3H), 7.47 (t, *J* = 7.2 Hz, 1H), 7.26 (t, *J* = 7.2 Hz, 1H), 7.10 (d, *J* = 8.0 Hz, 1H), 7.05-7.01 (m, 2H), 3.88 (s, 3H). <sup>13</sup>C NMR (100 MHz, CDCl<sub>3</sub>) δ (ppm): 159.2, 141.6, 139.3, 138.2, 136.6, 131.5, 129.6, 128.4, 127.9, 123.6, 122.8, 120.4, 117.7, 115.8, 114.9, 62.8, 55.6. HRMS (ESI) *m/z*: [M]<sup>+</sup> calcd for C<sub>19</sub>H<sub>13</sub>IO<sub>2</sub>Te 513.9073; found 513.9058.

**Synthesis of 4-(9-(4-methoxyphenyl)indeno[2,1-*b*]-2-telluropyranyl)-*N,N*-diphenylaniline (3n).**

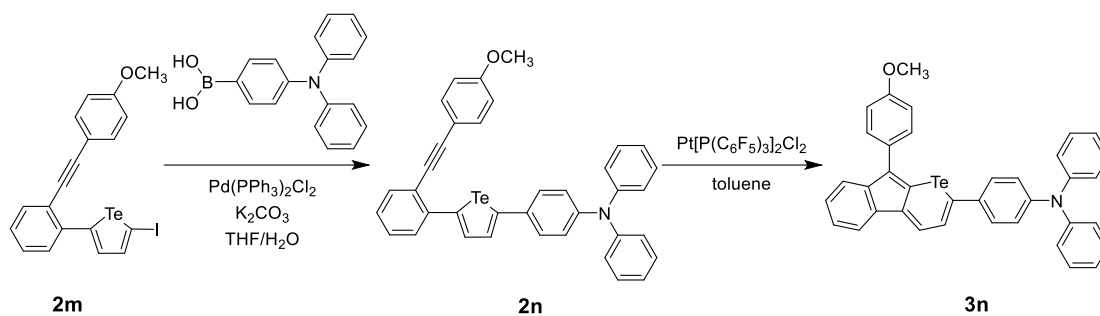

Compound **2m** (100 mg, 0.2 mmol), 4-(diphenylamino)phenylboronic acid (86 mg, 0.3 mmol), and Pd(PPh<sub>3</sub>)<sub>2</sub>Cl<sub>2</sub> (7 mg, 0.01 mmol) were dissolved in deoxygenated THF (5 mL). The sealed tube was evacuated and backfilled with nitrogen. Deoxygenated 2 M K<sub>2</sub>CO<sub>3</sub> (aq) (3 mL) was added via syringe. The reaction mixture was stirred and refluxed overnight. After removing the solvents in vacuum, the mixture was separated and purified by column chromatography on silica gel (eluent: DCM/PE = 1/5) to yield product **2n** (104 mg, yield: 83%) as a yellow solid. <sup>1</sup>H NMR (400 MHz, CDCl<sub>3</sub>) δ (ppm): 8.12 (d, *J* = 4.4 Hz, 1H), 7.80 (d, *J* = 4.4 Hz, 1H), 7.73 (d, *J* = 8.0 Hz, 1H), 7.62 (d, *J* = 7.6 Hz, 1H), 7.57-7.55 (m, 2H), 7.38-7.33 (m, 3H), 7.29-7.27 (m, 2H), 7.26-7.23 (m, 3H), 7.14-7.11 (m, 4H), 7.06-7.01 (m, 4H), 6.94-6.91 (m, 2H), 3.84 (s, 3H). <sup>13</sup>C NMR (100 MHz, CDCl<sub>3</sub>) δ (ppm): 160.2, 151.3, 147.7, 141.6, 141.2, 136.8, 134.6, 134.1, 133.6, 131.6, 129.7, 129.5, 128.6, 127.7, 126.7, 126.1, 124.8, 123.8, 123.3, 120.7, 115.4, 114.4, 97.5, 88.8, 55.6.

Following the general procedure of the ring-expansion reaction, the crude product was purified using column chromatography on silica gel (eluent: DCM/PE = 1/10) to yield product **3n** (68 mg, 76%) as a green solid. <sup>1</sup>H NMR (400 MHz, CDCl<sub>3</sub>) δ (ppm): 8.02 (d, *J* = 7.6 Hz, 1H), 7.68-7.65 (m, 3H), 7.60 (d, *J* = 7.6 Hz, 1H), 7.48-7.41 (m, 2H), 7.36 (d, *J* = 7.2 Hz, 2H), 7.32-7.24 (m, 5H), 7.16-7.15 (m, 4H), 7.11-7.05 (m, 6H), 3.89 (s, 3H). <sup>13</sup>C NMR (100 MHz, CDCl<sub>3</sub>) 158.9, 149.0, 147.4, 141.8, 136.1, 135.9, 133.5, 130.7, 130.2, 129.7, 128.3, 128.0, 127.6, 125.3, 124.9, 123.9, 123.7, 122.9, 122.2, 120.3, 117.6, 114.7, 111.7, 55.6. HRMS (ESI) *m/z*: [M + H]<sup>+</sup> calcd for C<sub>37</sub>H<sub>28</sub>NOTe 632.1228; found 632.1234.

### Synthesis of 1,1-diiodo-9-phenyl-indeno[2,1-*b*]tellurophran (**3d•I<sub>2</sub>**)

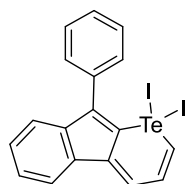

**3d•I<sub>2</sub>**

The 3 mL chloroform solution of I<sub>2</sub> (51 mg, 0.20 mmol) was slowly added to **3d** (70 mg, 0.20 mmol) in 3 mL chloroform solution. After stirring for 2 min, PE could be added, then the crude was filtered. **3d•I<sub>2</sub>** (118 mg, yield: 98% ) could be purified as a red solid. <sup>1</sup>H NMR (400 MHz, CDCl<sub>3</sub>, δ ppm): 7.87 (d, *J* = 7.2 Hz, 2H), 7.83-7.81 (m, 1H), 7.68-7.65 (m, 2H) 7.62-7.58 (m, 1H) 7.48-7.42 (m, 4H), 7.20 (d, *J* = 8.0 Hz, 1H), 7.01 (t, *J* = 8.0 Hz, 1H). <sup>13</sup>C NMR of **3d•I<sub>2</sub>** can't be obtained because of the poor solubility of **3d•I<sub>2</sub>** in CDCl<sub>3</sub> and the HRMS (ESI) of it shows deiodized.

#### Synthesis of 2-(1-propynyl)-9-(4-methoxyphenyl)indeno[2,1-*b*]tellurophyrane (**4a**).

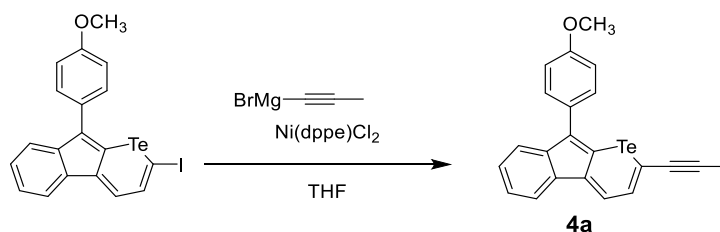

Ni(dppe)Cl<sub>2</sub> (5 mg, 0.01 mmol) and compound **3m** (50 mg, 0.1 mmol) were dissolved in deoxygenated THF (3 mL). The sealed tube was evacuated and backfilled with nitrogen. Deoxygenated 1-propynylmagnesium bromide (0.5 mol/L in deoxygenated THF) (3 mL) was added via syringe at 0 °C for 1 h. Then the reaction mixture was stirred and refluxed overnight. After removing the solvents in vacuum, the mixture was separated and purified by column chromatography on silica gel (eluent: DCM : PE = 1:10) to yield product **4a** (31 mg, yield: 72%) as a green solid. <sup>1</sup>H NMR (400 MHz, DMSO-*d*<sub>6</sub>) δ (ppm): 8.14 (d, *J* = 7.6 Hz, 1H), 7.75 (d, *J* = 8.0 Hz, 1H), 7.55 (d, *J* = 8.4 Hz, 3H), 7.51(d, *J* = 7.6 Hz, 1H), 7.43 (t, *J* = 7.6 Hz, 1H), 7.27 (d, *J* = 7.2 Hz, 1H), 7.12

(d,  $J = 8.4$  Hz, 2H), 3.82 (s, 3H), 2.16 (s, 3H).  $^{13}\text{C}$  NMR (100 MHz,  $\text{DMSO-}d_6$ )  $\delta$  (ppm): 159.36, 141.58, 138.27, 136.07, 132.50, 130.91, 129.29, 128.62, 128.16, 125.26, 123.18, 121.63, 117.76, 115.54, 110.62, 108.48, 100.89, 82.11, 79.6, 55.93, 5.54. HRMS (ESI)  $m/z$ :  $[\text{M} + \text{H}]^+$  calcd for  $\text{C}_{22}\text{H}_{17}\text{OTe}$  427.0336; found 427.0334.

### Synthesis of 2-(9-(4-methoxyphenyl)indeno[2,1-*b*]-2-telluropyranyl)furan (4b).

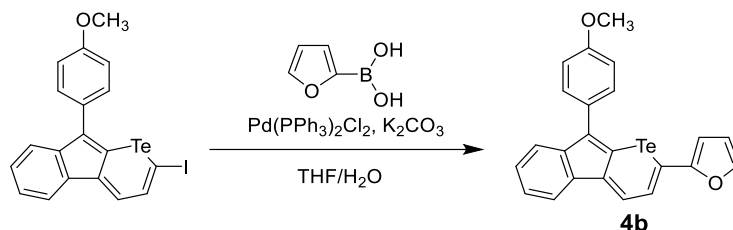

Compound **3m** (50 mg, 0.1 mmol), 2-furanboronic acid (17 mg, 0.15 mmol), and  $\text{Pd}(\text{PPh}_3)_2\text{Cl}_2$  (7 mg, 0.01 mmol) were dissolved in deoxygenated THF (5 mL). The sealed tube was evacuated and backfilled with nitrogen. Deoxygenated 2 M  $\text{K}_2\text{CO}_3$  (aq) (1.5 mL) was added via syringe. The reaction mixture was stirred and refluxed overnight. After removing the solvents in vacuum, the mixture was separated and purified by column chromatography on silica gel (eluent:  $\text{DCM} : \text{PE} = 1:10$ ) to yield product **4b** (41 mg, yield: 91%) as green solid.  $^1\text{H}$  NMR (400 MHz,  $\text{CDCl}_3$ )  $\delta$  (ppm): 8.00 (d,  $J = 7.6$  Hz, 1H), 7.60-7.66 (m, 4H), 7.57 (d,  $J = 7.6$  Hz, 1H), 7.48 (d,  $J = 2.0$  Hz, 1H), 7.42 (t,  $J = 7.6$  Hz, 1H), 7.23-7.27 (m, 1H), 7.06-7.08 (m, 2H), 6.67 (d,  $J = 3.6$  Hz, 1H), 6.50-6.52 (m, 1H), 3.90 (s, 3H).  $^{13}\text{C}$  NMR (100 MHz,  $\text{CDCl}_3$ )  $\delta$  (ppm): 159.0, 155.4, 143.6, 141.7, 137.9, 136.0, 131.3, 130.1, 128.2, 127.7, 124.6, 122.4, 121.1, 120.4, 117.9, 117.6, 114.8, 113.0, 109.7, 107.2, 55.6. HRMS (ESI)  $m/z$ :  $[\text{M} + \text{H}]^+$  calcd for  $\text{C}_{23}\text{H}_{17}\text{O}_2\text{Te}$  455.0285; found 455.0285.

### Synthesis of 2-(9-(4-methoxyphenyl)indeno[2,1-*b*]-2-telluropyranyl)thiophene (4c).

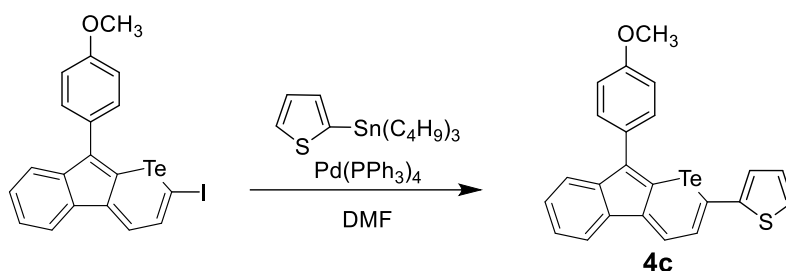

Compound **3m** (50 mg, 0.1 mmol), 2-(tributylstannyl)thiophene (38 mg, 0.15 mmol), Pd(PPh<sub>3</sub>)<sub>4</sub> (12 mg, 0.01 mmol) were dissolved in deoxygenated DMF (5 mL). The sealed tube was evacuated and backfilled with nitrogen. The reaction mixture was stirred and heated at 120 °C overnight. After removing the solvents in vacuum, the mixture was separated and purified by column chromatography on silica gel (eluent: DCM : PE = 1:10) to yield product **4c** (39 mg, yield: 83%) as green solid. <sup>1</sup>H NMR (400 MHz, DMSO-*d*<sub>6</sub>) δ (ppm): 8.12 (d, *J* = 7.2 Hz, 1H), 7.81 (d, *J* = 8.4 Hz, 1H), 7.70 (d, *J* = 4.8 Hz, 1H), 7.64-7.59 (m, 3H), 7.51 (d, *J* = 7.6 Hz, 1H), 7.42 (t, *J* = 7.6 Hz, 1H), 7.38 (d, *J* = 4.0 Hz, 1H), 7.26 (t, *J* = 7.6 Hz, 1H), 7.17-7.13 (m, 3H), 3.84 (s, 3H). <sup>13</sup>C NMR (100 MHz, DMSO-*d*<sub>6</sub>) δ (ppm): 159.5, 145.8, 141.7, 137.9, 136.2, 131.4, 129.6, 129.4, 129.0, 128.5, 128.5, 127.6, 126.0, 124.2, 123.2, 122.8, 121.5, 117.9, 115.6, 110.4, 56.0. HRMS (ESI) *m/z*: [M + H]<sup>+</sup> calcd for C<sub>23</sub>H<sub>17</sub>OSTe 471.0057; found 471.0051.

#### Synthesis of 9-(4-methoxyphenyl)-*N,N*-diphenylindeno[2,1-*b*]telluropyran-2-amine (**4d**).

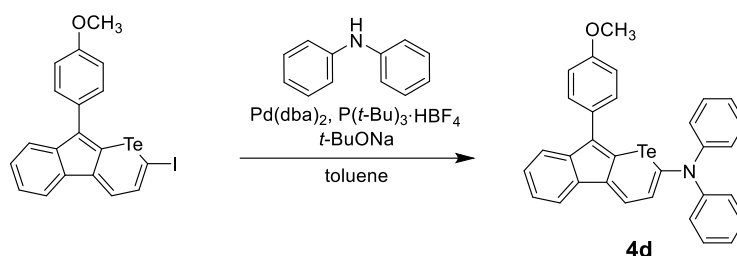

Compound **3m** (50 mg, 0.1 mmol), diphenylamine (25 mg, 0.15 mmol), Pd(dba)<sub>2</sub> (6 mg, 0.01 mmol), P(*t*-Bu)<sub>3</sub>·HBF<sub>4</sub> (11 mg, 0.04 mmol), and *t*-BuONa (10 mg, 0.1 mmol) were dissolved in deoxygenated toluene (5 mL). The sealed tube was evacuated and

backfilled with nitrogen. The reaction mixture was stirred and heated at 110 °C overnight. After removing the solvents in vacuum, the mixture was separated and purified by column chromatography on silica gel (eluent: DCM : PE = 1:10) to yield product **4d** (41 mg, yield: 75%) as brown solid. <sup>1</sup>H NMR (400 MHz, DMSO-*d*<sub>6</sub>) δ (ppm): 7.92 (d, *J* = 7.6 Hz, 1H), 7.66 (d, *J* = 9.2 Hz, 1H), 7.48-7.39 (m, 11H), 7.35-7.31 (m, 2H) 7.25 (d, *J* = 7.2 Hz, 1H), 7.14 (t, *J* = 7.6 Hz, 1H), 7.05-7.02 (m, 2H), 6.31 (d, *J* = 9.2 Hz, 1H), 3.77(s, 3H). <sup>13</sup>C NMR (100 MHz, DMSO-*d*<sub>6</sub>) δ (ppm): 158.9, 146.5, 143.8, 140.6, 136.4, 134.0, 131.0, 130.6, 130.1, 128.9, 128.3, 128.1, 128.0, 126.0, 125.6, 123.3, 122.2, 120.0, 117.6, 115.5, 111.7, 108.3, 55.9. HRMS (ESI) *m/z*: [M + H]<sup>+</sup> calcd for C<sub>31</sub>H<sub>24</sub>NO<sub>2</sub>Te 556.0915; found 556.0914.

#### Synthesis of 9,9'-bis(4-methoxyphenyl)-2,2'-biindeno[2,1-*b*]telluropyran (**4e**).

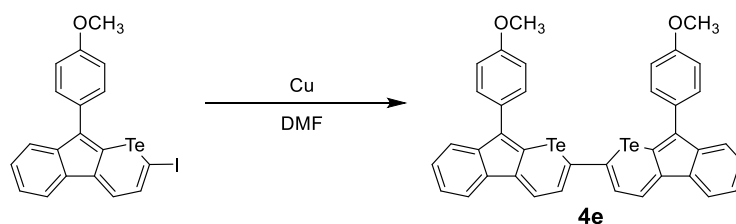

To a stirred mixture of 100 mg (0.2 mmol) of **3m** of DMF was added 50 mg (0.8 mol) of copper powder. The mixture was heated to 150 °C and maintained at this temperature for 48 hours. After removing the solvents in vacuum, the mixture was separated and purified by column chromatography on silica gel (eluent: DCM : PE = 1:5) to yield product **4e** (52 mg, yield: 68%) as green solid. <sup>1</sup>H NMR (400 MHz, CDCl<sub>3</sub>) δ (ppm): 7.93 (d, *J* = 7.6 Hz, 2H), 7.60 (d, *J* = 8.4 Hz, 4H), 7.48-7.52 (m, 4H), 7.38-7.44 (m, 4H), 7.22 (t, *J* = 7.6 Hz, 2H), 7.03 (d, *J* = 8.4 Hz, 4H), 3.90 (s, 6H). <sup>13</sup>C NMR (100 MHz, CDCl<sub>3</sub>) δ (ppm): 159.2, 142.2, 139.1, 135.9, 134.2, 133.6, 133.0, 130.4, 129.7, 128.4, 128.4, 127.7, 123.6, 123.0, 120.9, 118.1, 114.9, 111.6, 55.4. HRMS (ESI) *m/z*: [M + H]<sup>+</sup> calcd for C<sub>38</sub>H<sub>27</sub>O<sub>2</sub>Te<sub>2</sub> 771.0100; found 771.0115.

#### Synthesis of 9-(4-methoxyphenyl)-2-(phenylethynyl)indeno[2,1-*b*]telluropyran (**4f**).



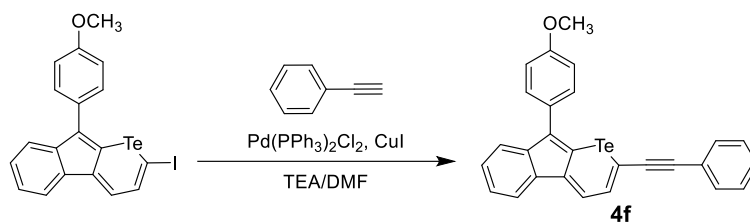

Pd(PPh<sub>3</sub>)<sub>2</sub>Cl<sub>2</sub> (7 mg, 0.01 mmol), CuI (5 mg, 0.03 mmol) and ethynylbenzene (15 mg, 0.15 mmol) were added to a degassed solution of **3m** (50 mg, 0.1 mmol) and TEA (3 mL) in dry DMF (5 mL). The mixture was stirred overnight at room temperature. The resulting mixture was extracted with dichloromethane, and the combined organic layer was dried with Na<sub>2</sub>SO<sub>4</sub> and concentrated in vacuum. The product was separated and purified by column chromatography on silica gel (eluent: DCM : PE = 1:10) to yield product **4f** (43 mg, yield: 89%) as green solid. <sup>1</sup>H NMR (400 MHz, DMSO-*d*<sub>6</sub>) δ (ppm): 8.16 (d, *J* = 7.6 Hz, 1H), 7.79 (d, *J* = 8.0 Hz, 1H), 7.73 (d, *J* = 8.0 Hz, 1H), 7.59-7.50 (m, 5H), 7.47-7.41 (m, 4H), 7.27 (t, *J* = 7.2 Hz, 1H), 7.13-7.10 (m, 2H), 3.81 (s, 3H). <sup>13</sup>C NMR (100 MHz, DMSO-*d*<sub>6</sub>) δ (ppm): 159.4, 141.6, 138.5, 136.0, 133.6, 132.1, 131.6, 130.3, 129.6, 129.3, 128.9, 128.2, 125.2, 123.3, 122.3, 121.8, 117.9, 115.5, 110.6, 106.3, 101.5, 91.3, 55.9. HRMS (ESI) *m/z*: [M + H]<sup>+</sup> calcd for C<sub>27</sub>H<sub>19</sub>OTe 489.0493; found 489.0492.

#### 4. X-ray crystallographic data.

**Figure S1.** ORTEP diagram (ellipsoid contour probability level 50%) and crystal packings of compound **2a**.

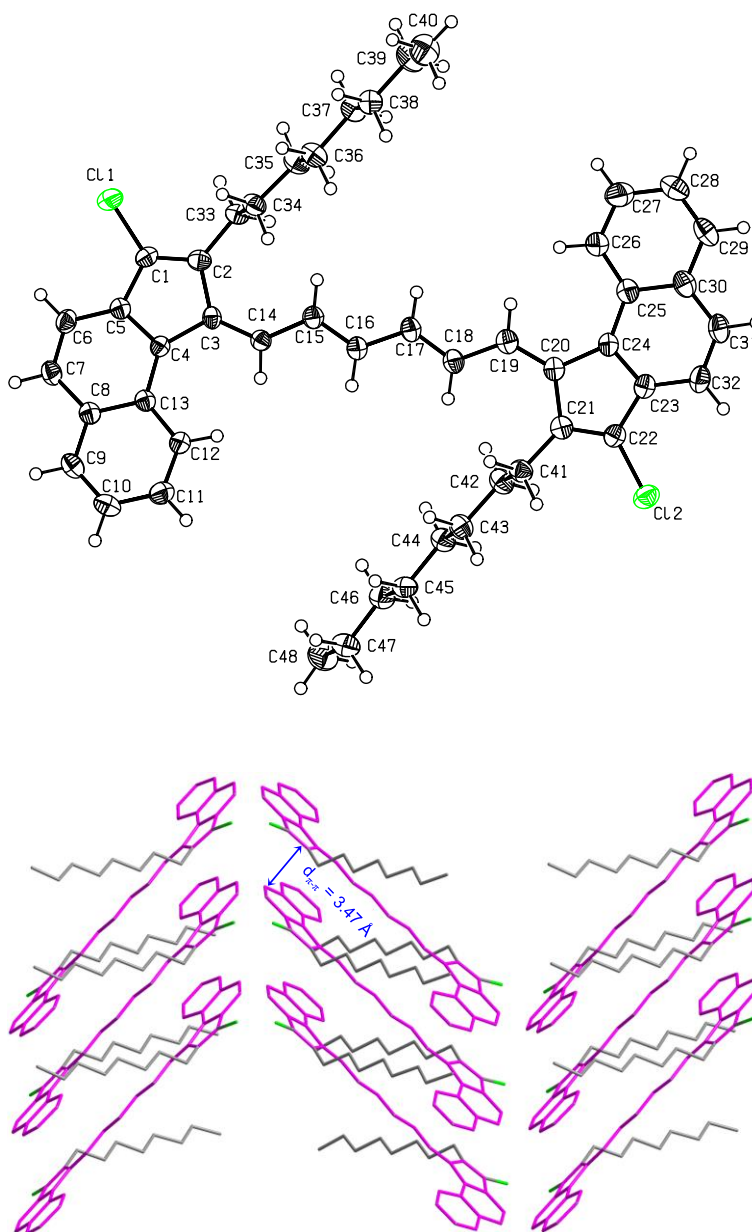

**Figure S2.** ORTEP diagram (ellipsoid contour probability level 50%) and crystal packings of compound **2b**.

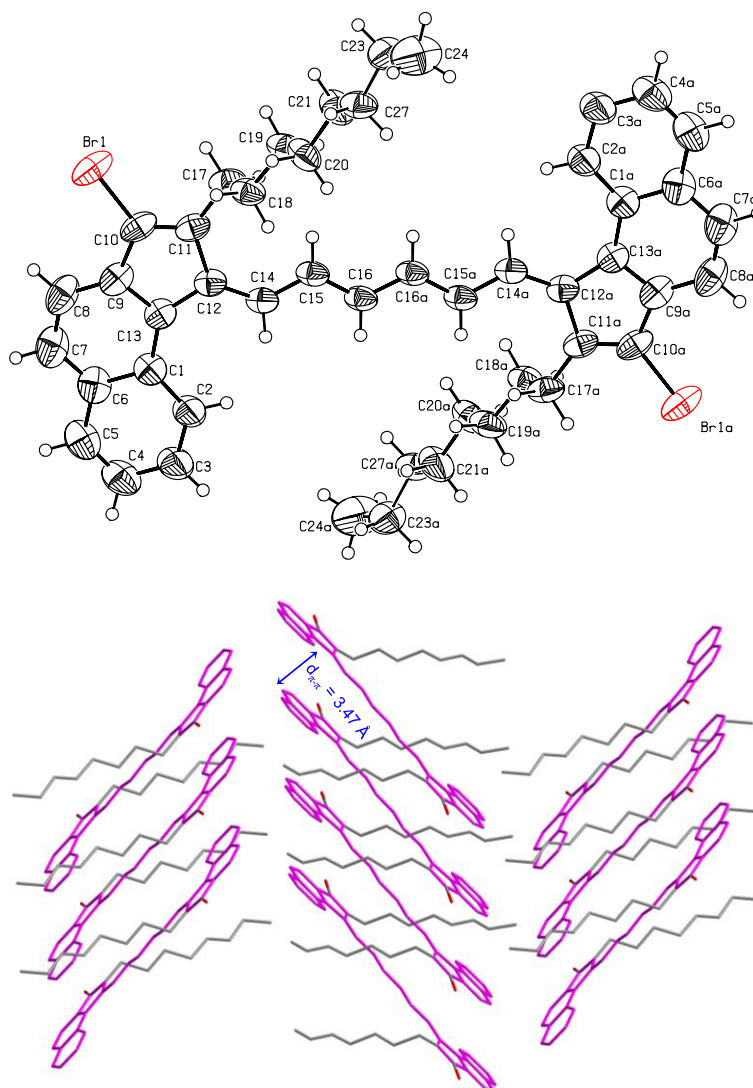



**Figure S4.** ORTEP diagram for the crystal structure of  $\text{Pt}[\text{P}(\text{C}_6\text{F}_5)_3]_2\text{Cl}_2$  with an ellipsoid contour probability level of 50%.

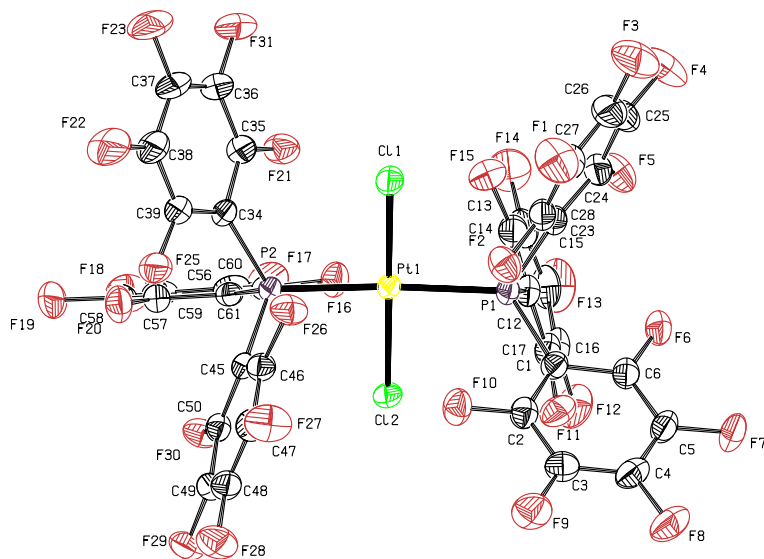

**Table S1.** Single crystal data and structure refinements for **2a**, **2b**, **3g**, and **Pt[P(C<sub>6</sub>F<sub>5</sub>)<sub>3</sub>]<sub>2</sub>Cl<sub>2</sub>**.

|                                                            | <b>2a</b>                                       | <b>2b</b>                                       | <b>3g</b>                           | <b>Pt[P(C<sub>6</sub>F<sub>5</sub>)<sub>3</sub>]<sub>2</sub>Cl<sub>2</sub></b> |
|------------------------------------------------------------|-------------------------------------------------|-------------------------------------------------|-------------------------------------|--------------------------------------------------------------------------------|
| CCDC No.                                                   | 2132835                                         | 2132837                                         | 2132833                             | 2132838                                                                        |
| formula                                                    | C <sub>48</sub> H <sub>52</sub> Cl <sub>2</sub> | C <sub>48</sub> H <sub>52</sub> Br <sub>2</sub> | C <sub>18</sub> H <sub>11</sub> FTe | C <sub>36</sub> Cl <sub>2</sub> F <sub>30</sub> P <sub>2</sub> Pt              |
| formula wt.                                                | 699.79                                          | 788.75                                          | 373.87                              | 1330.29                                                                        |
| <i>T</i> (K)                                               | 173(2)                                          | 173(2)                                          | 173(2)                              | 173(2)                                                                         |
| wavelength (Å)                                             | 1.54178                                         | 1.54178                                         | 1.54178                             | 1.54178                                                                        |
| crystal size(mm)                                           | 0.160 × 0.140 × 0.120                           | 0.200 × 0.180 × 0.150                           | 0.220 × 0.200 × 0.160               | 0.180 × 0.160 × 0.140                                                          |
| crystal syst.                                              | Monoclinic                                      | Monoclinic                                      | Orthorhombic                        | Triclinic                                                                      |
| space group                                                | <i>P</i> 2 <sub>1</sub>                         | <i>P</i> 2 <sub>1</sub> / <i>n</i>              | <i>Pccn</i>                         | <i>P</i> <sub>1</sub>                                                          |
| <i>a</i> (Å)                                               | 4.98570(10)                                     | 15.8510(17)                                     | 14.5848(4)                          | 12.7283(13)                                                                    |
| <i>b</i> (Å)                                               | 24.9845(6)                                      | 5.0925(10)                                      | 23.5345(7)                          | 14.371(3)                                                                      |
| <i>c</i> (Å)                                               | 15.7241(4)                                      | 24.933(4)                                       | 8.1922(3)                           | 14.6091(19)                                                                    |
| <i>α</i> (deg.)                                            | 90.0000                                         | 90.0000                                         | 90.0000                             | 101.005(15)                                                                    |
| <i>β</i> (deg.)                                            | 92.193(2)                                       | 100.051(7)                                      | 90.0000                             | 115.013(10)                                                                    |
| <i>γ</i> (deg.)                                            | 90.0000                                         | 90.0000                                         | 90.0000                             | 108.814(7)                                                                     |
| <i>V</i> (Å <sup>3</sup> )                                 | 1957.24(8)                                      | 1981.8(5)                                       | 2811.94(15)                         | 2118.9(6)                                                                      |
| <i>Z</i> / <i>D</i> <sub>calcd.</sub> (mg/m <sup>3</sup> ) | 2 / 1.187                                       | 2 / 1.322                                       | 8 / 1.766                           | 2 / 2.085                                                                      |
| <i>μ</i> (mm <sup>-1</sup> )                               | 1.720                                           | 2.821                                           | 16.678                              | 9.610                                                                          |
| <i>F</i> (000)                                             | 748                                             | 820                                             | 1440                                | 1256                                                                           |
|                                                            | <i>R</i> 1 = 0.0403                             | <i>R</i> 1 = 0.0515                             | <i>R</i> 1 = 0.0263                 | <i>R</i> 1 = 0.0202                                                            |
| [ <i>I</i> > 2 <i>θ</i> ( <i>I</i> )]                      | <i>wR</i> 2 = 0.0937                            | <i>wR</i> 2 = 0.1297                            | <i>wR</i> 2 = 0.0732                | <i>wR</i> 2 = 0.0510                                                           |
| R indices (all data)                                       | <i>R</i> = 0.0530                               | <i>R</i> = 0.0558                               | <i>R</i> = 0.0307                   | <i>R</i> = 0.0222                                                              |
|                                                            | <i>wR</i> 2 = 0.1005                            | <i>wR</i> 2 = 0.1332                            | <i>wR</i> 2 = 0.0762                | <i>wR</i> 2 = 0.0519                                                           |

**Table S2.** Selected bond lengths for **2a**

| Bond    | Length/Å | Bond    | Length/Å |
|---------|----------|---------|----------|
| C11-C1  | 1.734(4) | C21-C22 | 1.349(6) |
| C12-C22 | 1.727(4) | C21-C41 | 1.498(6) |
| C1-C2   | 1.341(6) | C22-C23 | 1.455(6) |
| C2-C3   | 1.487(6) | C23-C24 | 1.392(6) |
| C4-C3   | 1.486(5) | C23-C32 | 1.400(6) |
| C1-C5   | 1.456(6) | C24-C25 | 1.429(6) |
| C4-C5   | 1.399(5) | C25-C26 | 1.419(7) |
| C5-C6   | 1.394(5) | C25-C30 | 1.443(6) |
| C3-C14  | 1.359(5) | C26-C27 | 1.363(7) |
| C4-C13  | 1.435(5) | C27-C28 | 1.403(7) |
| C7-C8   | 1.425(6) | C28-C29 | 1.362(7) |
| C6-C7   | 1.361(6) | C29-C30 | 1.411(6) |
| C2-C33  | 1.500(5) | C30-C31 | 1.414(6) |
| C9-C10  | 1.360(6) | C33-C34 | 1.525(6) |
| C9-C8   | 1.410(6) | C34-C35 | 1.521(6) |
| C8-C13  | 1.427(5) | C35-C36 | 1.525(6) |
| C10-C11 | 1.404(6) | C36-C37 | 1.524(6) |
| C11-C12 | 1.356(6) | C37-C38 | 1.525(6) |
| C13-C12 | 1.426(5) | C38-C39 | 1.513(7) |
| C14-C15 | 1.429(5) | C39-C40 | 1.522(7) |
| C15-C16 | 1.356(6) | C41-C42 | 1.528(6) |
| C16-C17 | 1.428(6) | C42-C43 | 1.533(6) |
| C17-C18 | 1.341(6) | C43-C44 | 1.519(6) |
| C18-C19 | 1.436(6) | C44-C45 | 1.531(6) |
| C19-C20 | 1.364(6) | C45-C46 | 1.521(6) |
| C20-C21 | 1.483(7) | C46-C47 | 1.519(7) |
| C20-C24 | 1.495(6) | C47-C48 | 1.523(7) |

**Table S3.** Selected bond lengths for **2b**

| Bond    | Length/Å |
|---------|----------|
| Br1-C10 | 1.890(4) |
| C1-C2   | 1.418(6) |
| C1-C13  | 1.434(4) |
| C1-C6   | 1.437(6) |
| C2-C3   | 1.367(5) |
| C3-C4   | 1.389(6) |
| C4-C5   | 1.348(6) |
| C5-C6   | 1.420(5) |
| C7-C8   | 1.360(6) |
| C7-C6   | 1.411(6) |
| C8-C9   | 1.399(5) |
| C9-C13  | 1.391(5) |
| C9-C10  | 1.465(5) |
| C10-C11 | 1.338(5) |
| C11-C12 | 1.489(4) |
| C11-C17 | 1.505(4) |
| C12-C14 | 1.360(4) |
| C12-C13 | 1.485(4) |
| C14-C15 | 1.425(4) |
| C15-C16 | 1.348(5) |



**Table S4.** Selected bond lengths for **3g**.

| Bond    | Length/Å |
|---------|----------|
| Te1-C5  | 2.066(3) |
| Te1-C1  | 2.067(3) |
| C1-C2   | 1.336(5) |
| F1-C16  | 1.366(4) |
| C3-C4   | 1.351(4) |
| C3-C2   | 1.444(5) |
| C4-C8   | 1.466(4) |
| C4-C5   | 1.466(4) |
| C5-C6   | 1.371(4) |
| C6-C13  | 1.469(4) |
| C6-C7   | 1.470(4) |
| C8-C9   | 1.391(4) |
| C8-C7   | 1.416(4) |
| C7-C12  | 1.458(5) |
| C9-C10  | 1.390(5) |
| C10-C11 | 1.392(5) |
| C11-C12 | 1.349(5) |
| C13-C18 | 1.394(5) |
| C13-C14 | 1.400(5) |
| C14-C15 | 1.398(5) |
| C15-C16 | 1.364(6) |
| C16-C17 | 1.378(5) |
| C17-C18 | 1.391(5) |

## 5. Density functional theory calculations.

Density-functional theory (DFT) calculations were performed with Gaussian 16 program<sup>S3</sup>. Geometry optimizations were performed with the  $\omega$ B97X-D<sup>S4</sup> functional. The LANL2DZ basis set with effective core potential (ECP) was used for Pt and Te, and the 6-31G(d) basis set was used for other atoms. Frequency calculations were performed at the same level of theory as for geometry optimization to characterize the stationary points as either minima (no imaginary frequencies) or first-order saddle points (one imaginary frequency) on the potential energy surface, as well as to obtain thermal Gibbs free energy corrections. Intrinsic reaction coordinate calculations were performed to ensure that the first-order saddle points found were true transition states (TS) connecting the reactants and the products. Single-point energies were calculated with ORCA package<sup>S5</sup> with the  $\omega$ B97M-V functional<sup>S6</sup> and the def2-TZVPP basis set.<sup>S7</sup> Solvation effects were incorporated with single-point energy calculations using the SMD<sup>S8</sup> solvation model. Molecular structure visualizations were obtained using CYLview.<sup>S9</sup>

**Figure S5.** Calculated pathway from compound **a** to intermediate **i** and the relative free energies (in kcal/mol) of each stationary point.

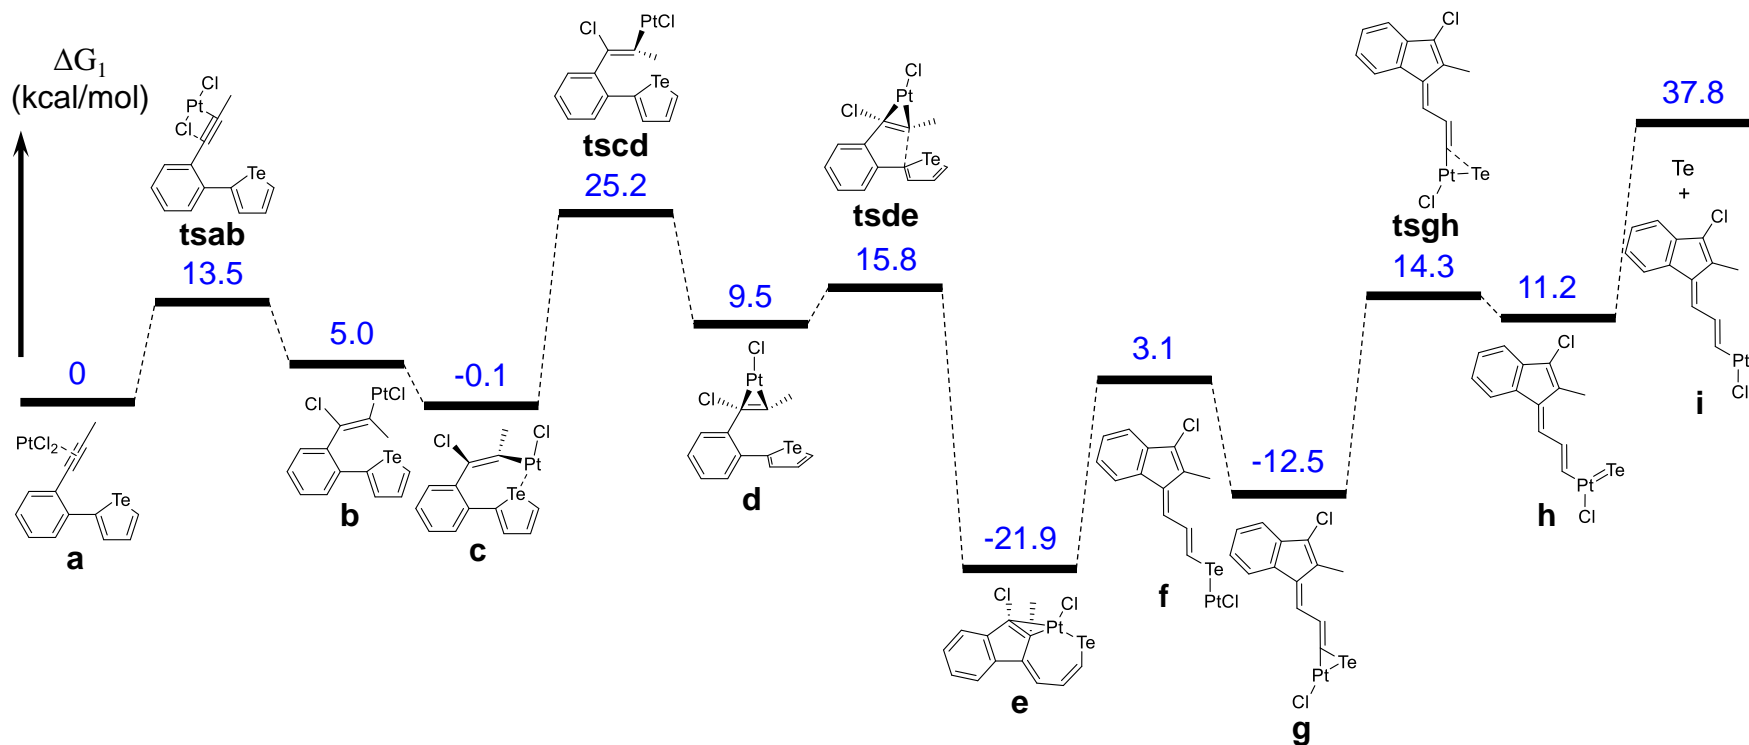

**Figure S6.** Calculated pathway from intermediate **i** to intermediate **q** and the relative free energies (in kcal/mol) of each stationary point.

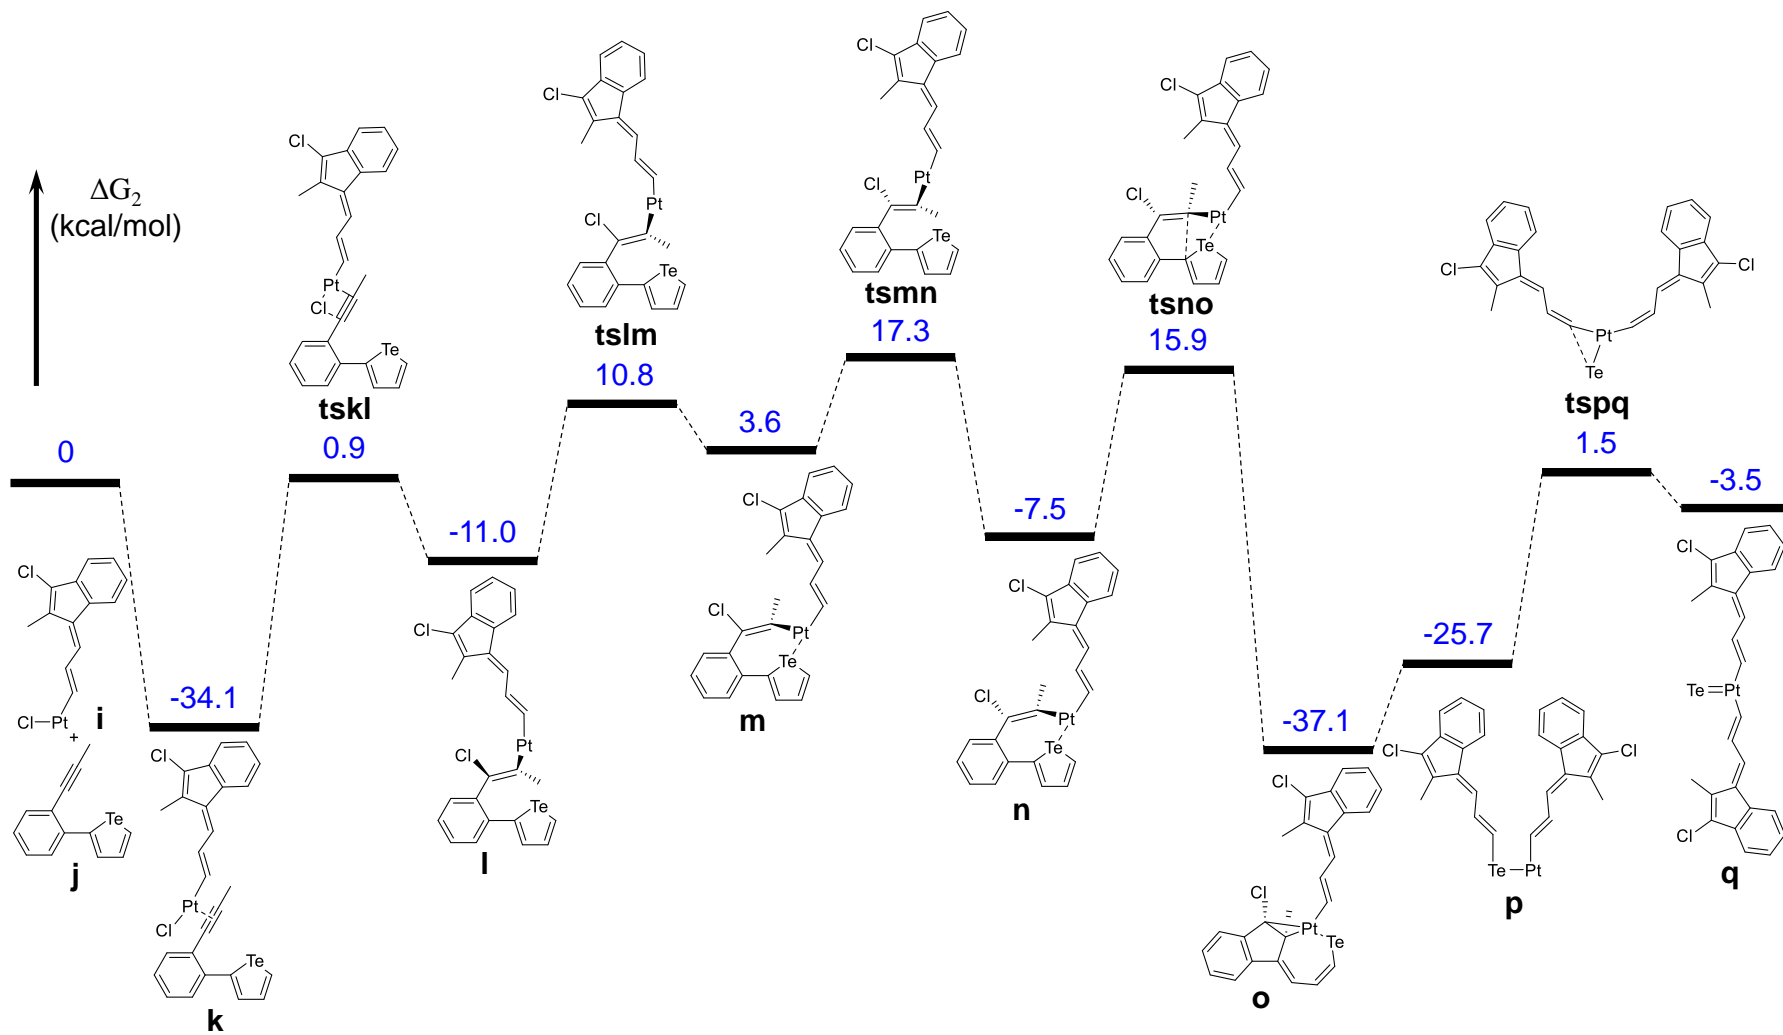

**Figure S7.** Calculated pathway from intermediate **r** to compound **t** and the relative free energies (in kcal/mol) of each stationary point.

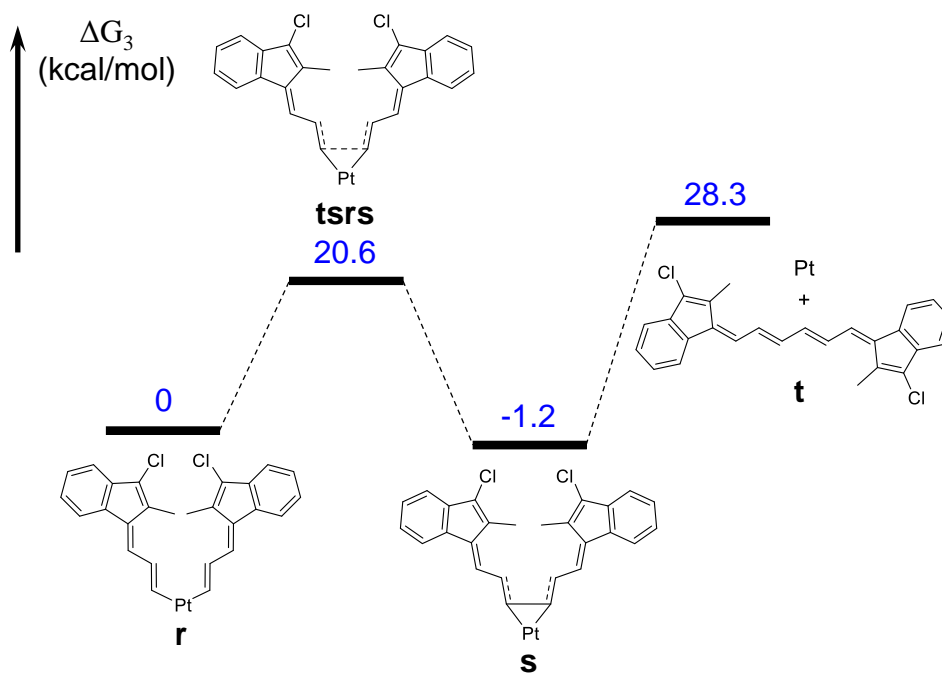

**Figure S8.** Calculated pathway from compound **j** to compound **y** and the relative free energies (in kcal/mol) of each stationary point.

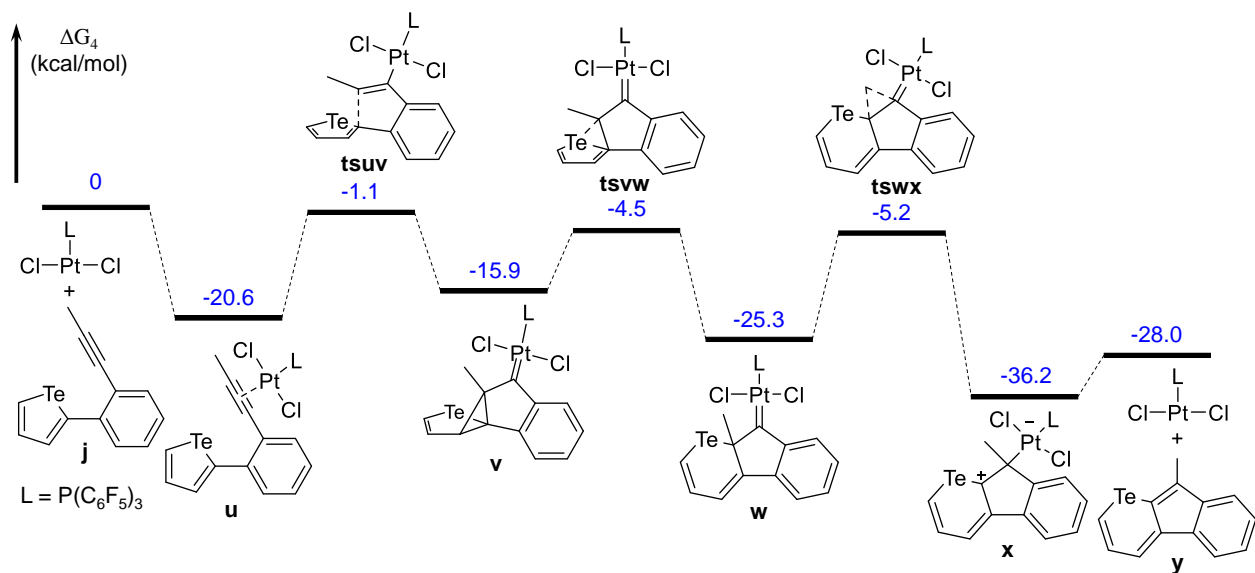

**Table S5.** Calculated geometries of all the stationary points in the ring-opening pathway.

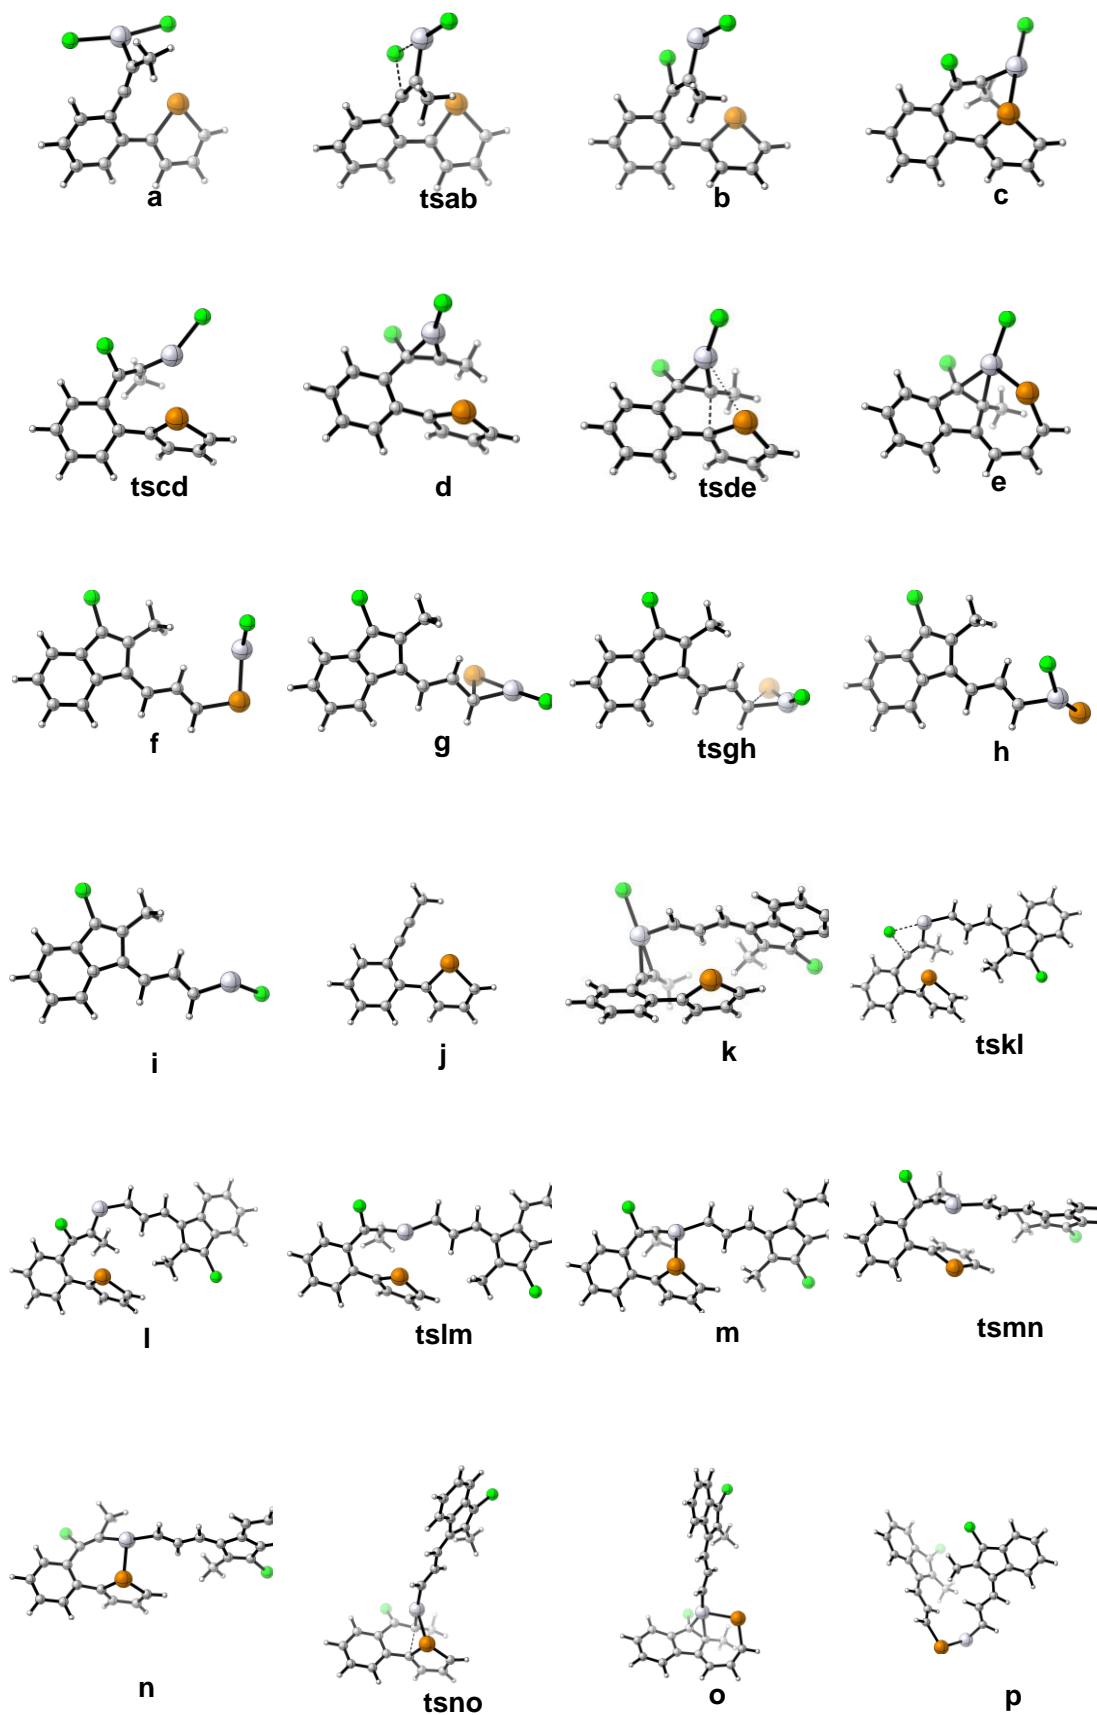

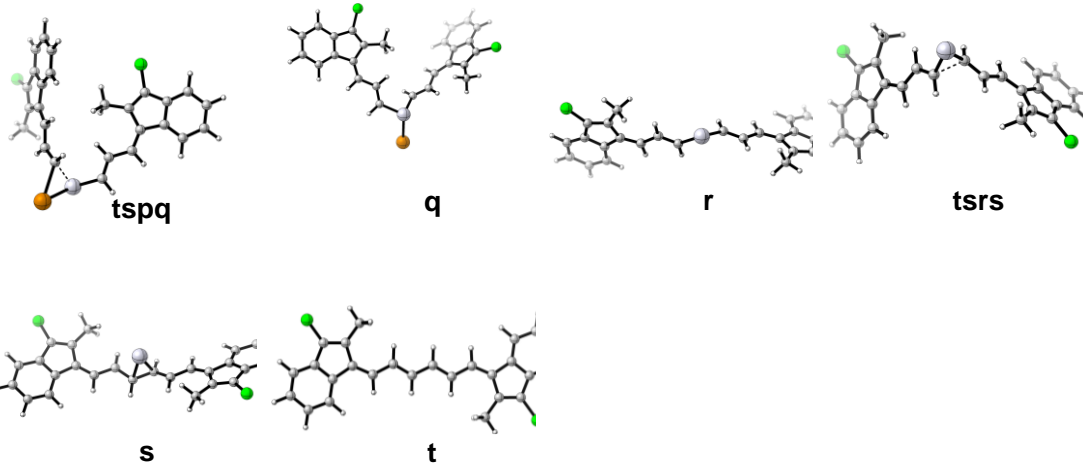



**Table S6.** Calculated geometries of all the stationary points in the ring-expansion pathway.

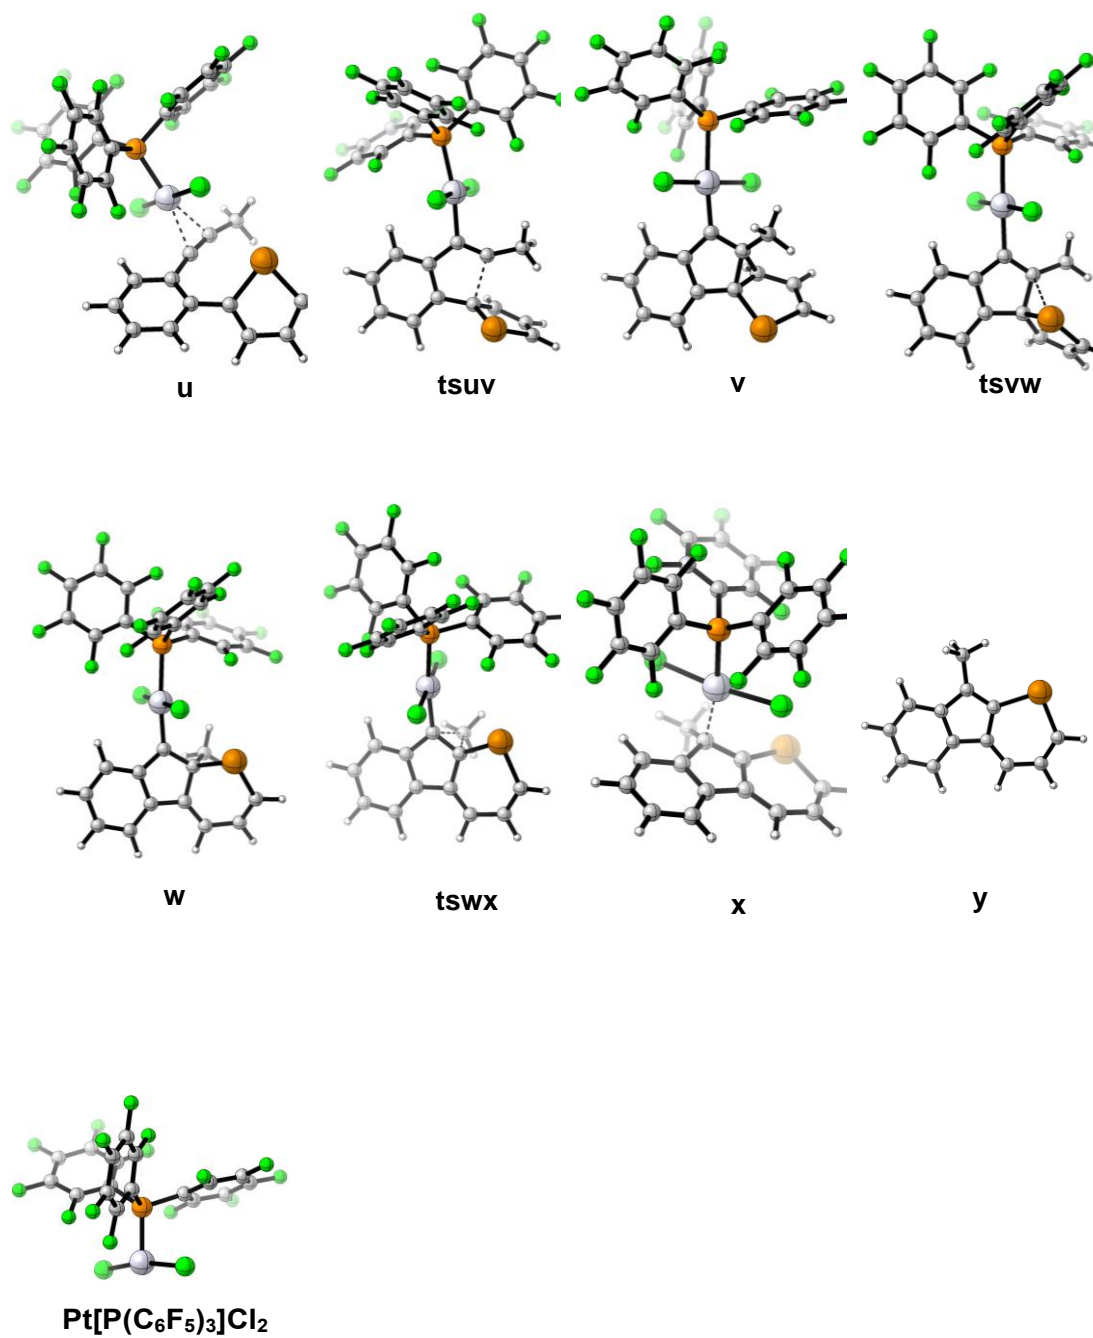

**Table S7.** Calculated orientation for intermediate **a** ( $E = -1808.921261$  Hartree).

| Atomic | Coordinates (Angstroms) |          |          |
|--------|-------------------------|----------|----------|
| Name   | X                       | Y        | Z        |
| C      | 0.090491                | 3.978266 | -0.5432  |
| C      | -1.28854                | 4.120616 | -0.41026 |
| C      | -2.0714                 | 3.033826 | -0.03236 |
| C      | -1.49431                | 1.789269 | 0.222114 |
| C      | -0.09674                | 1.656982 | 0.08578  |
| C      | 0.686869                | 2.749261 | -0.2957  |
| C      | -2.32283                | 0.638948 | 0.637913 |
| C      | 0.487614                | 0.367203 | 0.352785 |
| C      | 0.481415                | -0.82934 | 0.764034 |
| C      | -2.67952                | 0.343875 | 1.916376 |
| C      | -3.48334                | -0.82926 | 2.143715 |
| C      | -3.8308                 | -1.56777 | 1.060148 |
| Te     | -3.0891                 | -0.77268 | -0.6902  |
| C      | 0.068711                | -2.09471 | 1.365352 |
| Pt     | 2.332255                | -0.40358 | -0.13858 |
| Cl     | 3.340468                | 0.245218 | 1.862379 |
| Cl     | 1.636171                | -1.08817 | -2.25464 |
| H      | 0.703055                | 4.823953 | -0.83852 |
| H      | -1.75807                | 5.080641 | -0.6015  |
| H      | -3.14702                | 3.140493 | 0.06992  |
| H      | 1.76128                 | 2.628971 | -0.39048 |
| H      | -2.35805                | 0.975204 | 2.740751 |
| H      | -3.79702                | -1.10596 | 3.146496 |
| H      | -4.43369                | -2.46786 | 1.082417 |
| H      | 0.740242                | -2.37002 | 2.184021 |
| H      | -0.94699                | -1.96793 | 1.758216 |
| H      | 0.064989                | -2.89185 | 0.615895 |

**Table S8.** Calculated orientation for transition state **tsab** ( $E = -1808.899774$  Hartree).

| Atomic<br>Name | Coordinates (Angstroms) |          |          |
|----------------|-------------------------|----------|----------|
|                | X                       | Y        | Z        |
| C              | -2.45642                | 4.00398  | 0.078179 |
| C              | -3.66861                | 3.307483 | -0.03261 |
| C              | -3.72702                | 1.923073 | 0.050053 |
| C              | -2.57614                | 1.153185 | 0.264356 |
| C              | -1.33866                | 1.868644 | 0.400085 |
| C              | -1.30192                | 3.288632 | 0.284705 |
| C              | -2.70101                | -0.29849 | 0.347468 |
| C              | -0.15724                | 1.235404 | 0.708928 |
| C              | 0.954443                | 0.738885 | 1.134817 |
| C              | -3.76715                | -0.91518 | 0.950757 |
| C              | -3.84266                | -2.34092 | 0.908246 |
| C              | -2.8525                 | -2.99132 | 0.24041  |
| Te             | -1.43928                | -1.71633 | -0.52017 |
| C              | 1.227852                | 0.611179 | 2.617295 |
| Pt             | 2.214186                | 0.120616 | -0.23932 |
| Cl             | 0.94613                 | 1.082322 | -1.97635 |
| Cl             | 3.72842                 | -0.97975 | 1.154128 |
| H              | -2.43206                | 5.084337 | -0.00876 |
| H              | -4.5868                 | 3.860199 | -0.20938 |
| H              | -4.67769                | 1.420798 | -0.08968 |
| H              | -0.33866                | 3.780765 | 0.366342 |
| H              | -4.52454                | -0.33396 | 1.47082  |
| H              | -4.65831                | -2.87426 | 1.387413 |
| H              | -2.78597                | -4.06661 | 0.12142  |
| H              | 2.171309                | 1.106139 | 2.858052 |
| H              | 0.42029                 | 1.058329 | 3.204969 |
| H              | 1.323024                | -0.44575 | 2.876371 |

**Table S9.** Calculated orientation for intermediate **b** ( $E = -1808.913329$  Hartree).

| Atomic | Coordinates (Angstroms) |          |          |
|--------|-------------------------|----------|----------|
| Name   | X                       | Y        | Z        |
| C      | -2.90519                | 3.813865 | 0.229086 |
| C      | -3.99087                | 2.974003 | 0.467448 |
| C      | -3.8055                 | 1.599659 | 0.546671 |
| C      | -2.53631                | 1.022946 | 0.397788 |
| C      | -1.43839                | 1.883874 | 0.179868 |
| C      | -1.63778                | 3.266831 | 0.090039 |
| C      | -2.41915                | -0.44571 | 0.48985  |
| C      | -0.07793                | 1.352329 | 0.081612 |
| C      | 0.71358                 | 0.608731 | 0.846688 |
| C      | -2.90632                | -1.18759 | 1.522976 |
| C      | -2.78684                | -2.61927 | 1.456816 |
| C      | -2.20801                | -3.14637 | 0.35051  |
| Te     | -1.62107                | -1.6898  | -0.98175 |
| C      | 0.424543                | 0.088899 | 2.211882 |
| Pt     | 2.351285                | 0.233716 | -0.14897 |
| Cl     | 0.844986                | 1.674125 | -1.48389 |
| Cl     | 3.584432                | -1.11326 | 1.224022 |
| H      | -3.04423                | 4.888074 | 0.16059  |
| H      | -4.98786                | 3.388913 | 0.581331 |
| H      | -4.65698                | 0.944995 | 0.703912 |
| H      | -0.78049                | 3.91363  | -0.07398 |
| H      | -3.35911                | -0.70313 | 2.384925 |
| H      | -3.14522                | -3.24837 | 2.266812 |
| H      | -2.04733                | -4.20189 | 0.16649  |
| H      | 1.253341                | 0.313311 | 2.888969 |
| H      | -0.49377                | 0.535367 | 2.605222 |
| H      | 0.302129                | -0.99897 | 2.176606 |

**Table S10.** Calculated orientation for intermediate **c** ( $E = -1808.921346$  Hartree).

| Atomic | Coordinates (Angstroms) |          |          |
|--------|-------------------------|----------|----------|
| Name   | X                       | Y        | Z        |
| C      | -4.55617                | -2.1216  | 0.213755 |
| C      | -4.98657                | -0.80521 | 0.359796 |
| C      | -4.06489                | 0.235458 | 0.372038 |
| C      | -2.69212                | -0.01754 | 0.250538 |
| C      | -2.26434                | -1.35858 | 0.096396 |
| C      | -3.1997                 | -2.39163 | 0.073232 |
| C      | -1.74823                | 1.121689 | 0.351858 |
| C      | -0.81592                | -1.56469 | -0.12386 |
| C      | 0.112384                | -1.08932 | 0.717161 |
| C      | -1.85692                | 2.109385 | 1.268373 |
| C      | -0.86982                | 3.176356 | 1.307754 |
| C      | 0.135376                | 3.14467  | 0.41679  |
| Te     | -0.05474                | 1.535472 | -0.88588 |
| C      | -0.11451                | -0.93009 | 2.191499 |
| Pt     | 1.744158                | -0.21757 | 0.06298  |
| Cl     | -0.41921                | -1.91941 | -1.81805 |
| H      | -5.27565                | -2.93447 | 0.20035  |
| H      | -6.04558                | -0.58464 | 0.454103 |
| H      | -4.41035                | 1.260863 | 0.462635 |
| H      | -2.85138                | -3.41216 | -0.05391 |
| H      | -2.65511                | 2.083335 | 2.006155 |
| H      | -0.94337                | 3.961544 | 2.055031 |
| H      | 0.940919                | 3.864115 | 0.33409  |
| H      | -0.01399                | 0.114905 | 2.50468  |
| H      | -1.10359                | -1.29843 | 2.48314  |
| H      | 0.641273                | -1.51082 | 2.731949 |
| Cl     | 3.363186                | -1.69658 | 0.818232 |

**Table S11.** Calculated orientation for transition state **tscd** ( $E = -1808.881121$  Hartree).

| Atomic<br>Name | Coordinates (Angstroms) |          |          |
|----------------|-------------------------|----------|----------|
|                | X                       | Y        | Z        |
| C              | 4.061835                | -2.59638 | 0.058474 |
| C              | 4.615152                | -1.4117  | 0.538812 |
| C              | 3.808776                | -0.29691 | 0.731573 |
| C              | 2.435252                | -0.33918 | 0.463621 |
| C              | 1.879035                | -1.54606 | -0.00963 |
| C              | 2.702853                | -2.6584  | -0.21683 |
| C              | 1.628552                | 0.883663 | 0.667528 |
| C              | 0.419619                | -1.6759  | -0.24816 |
| C              | -0.48228                | -1.51239 | 0.769196 |
| C              | 1.229588                | 1.382372 | 1.866107 |
| C              | 0.430536                | 2.581225 | 1.875114 |
| C              | 0.13764                 | 3.146956 | 0.679551 |
| Te             | 0.961874                | 2.098081 | -0.89329 |
| C              | -0.32609                | -1.81049 | 2.217248 |
| Pt             | -1.71746                | -0.31673 | 0.039186 |
| Cl             | -0.02512                | -2.23945 | -1.85827 |
| Cl             | -3.99758                | -0.33064 | 0.211332 |
| H              | 4.685633                | -3.47051 | -0.09975 |
| H              | 5.67728                 | -1.35323 | 0.756457 |
| H              | 4.239125                | 0.634116 | 1.087322 |
| H              | 2.265798                | -3.58165 | -0.58544 |
| H              | 1.486982                | 0.872298 | 2.791156 |
| H              | 0.074829                | 3.008807 | 2.808215 |
| H              | -0.449                  | 4.046417 | 0.536321 |
| H              | 0.714374                | -2.06199 | 2.447923 |
| H              | -0.66473                | -0.9884  | 2.850922 |
| H              | -0.94311                | -2.69026 | 2.443654 |

**Table S12.** Calculated orientation for intermediate **d** ( $E = -1808.906135$  Hartree).

| Atomic<br>Name | Coordinates (Angstroms) |          |          |
|----------------|-------------------------|----------|----------|
|                | X                       | Y        | Z        |
| C              | -0.50216                | 3.818566 | -1.514   |
| C              | 0.830227                | 3.69597  | -1.90049 |
| C              | 1.61916                 | 2.697956 | -1.3437  |
| C              | 1.103489                | 1.811436 | -0.39201 |
| C              | -0.2423                 | 1.940752 | -0.00582 |
| C              | -1.03222                | 2.945716 | -0.57535 |
| C              | -0.87934                | 0.996842 | 0.959882 |
| C              | 1.994389                | 0.783086 | 0.184283 |
| C              | 2.770501                | 0.947637 | 1.290377 |
| C              | 3.619343                | -0.14076 | 1.691916 |
| C              | 3.604144                | -1.26097 | 0.922988 |
| Te             | 2.325269                | -1.08898 | -0.67554 |
| Cl             | -1.91304                | 1.792118 | 2.193744 |
| C              | -0.45999                | -0.29059 | 1.345049 |
| Pt             | -1.6562                 | -0.6851  | -0.01431 |
| C              | 0.17681                 | -0.99783 | 2.456594 |
| Cl             | -2.80476                | -1.93383 | -1.59319 |
| H              | -1.13191                | 4.588929 | -1.94755 |
| H              | 1.253759                | 4.375199 | -2.63378 |
| H              | 2.65971                 | 2.595019 | -1.6366  |
| H              | -2.07457                | 3.032178 | -0.28607 |
| H              | 2.737817                | 1.875696 | 1.855179 |
| H              | 4.247619                | -0.0653  | 2.575045 |
| H              | 4.189484                | -2.15375 | 1.108811 |
| H              | 1.228369                | -0.70633 | 2.554539 |
| H              | -0.33616                | -0.67489 | 3.374292 |
| H              | 0.085832                | -2.07988 | 2.353094 |

**Table S13.** Calculated orientation for transition state **tsde** ( $E = -1808.896089$  Hartree).

| Atomic<br>Name | Coordinates (Angstroms) |          |          |
|----------------|-------------------------|----------|----------|
|                | X                       | Y        | Z        |
| C              | -0.77834                | 3.883875 | -1.62201 |
| C              | 0.573846                | 3.750754 | -1.93368 |
| C              | 1.336928                | 2.758129 | -1.32491 |
| C              | 0.745148                | 1.898593 | -0.40202 |
| C              | -0.61623                | 2.030681 | -0.10207 |
| C              | -1.37867                | 3.025943 | -0.70622 |
| C              | -1.13132                | 1.011873 | 0.841445 |
| C              | 1.501023                | 0.844029 | 0.31991  |
| C              | 2.284798                | 1.140889 | 1.4368   |
| C              | 3.268796                | 0.218443 | 1.843268 |
| C              | 3.464174                | -0.87125 | 1.02752  |
| Te             | 2.240516                | -0.90393 | -0.59407 |
| Cl             | -2.41053                | 1.55704  | 1.958282 |
| C              | -0.25321                | -0.00808 | 1.288892 |
| Pt             | -1.33921                | -0.83649 | -0.06378 |
| C              | 0.154991                | -0.54878 | 2.60684  |
| Cl             | -2.15085                | -2.50144 | -1.47578 |
| H              | -1.37113                | 4.65755  | -2.10012 |
| H              | 1.035972                | 4.423089 | -2.64977 |
| H              | 2.392683                | 2.653079 | -1.55822 |
| H              | -2.43375                | 3.120522 | -0.47041 |
| H              | 2.107948                | 2.063944 | 1.983009 |
| H              | 3.842689                | 0.360876 | 2.75338  |
| H              | 4.166755                | -1.66931 | 1.242021 |
| H              | 0.943229                | -1.29969 | 2.492782 |
| H              | 0.493048                | 0.239069 | 3.286347 |
| H              | -0.71411                | -1.05492 | 3.041804 |



**Table S14.** Calculated orientation for intermediate **e** ( $E = -1808.956104$  Hartree).

| Atomic<br>Name | Coordinates (Angstroms) |          |          |
|----------------|-------------------------|----------|----------|
|                | X                       | Y        | Z        |
| C              | -4.23991                | 0.034051 | -1.71029 |
| C              | -4.13774                | 1.425902 | -1.60867 |
| C              | -3.18535                | 2.019163 | -0.78535 |
| C              | -2.3477                 | 1.197079 | -0.03695 |
| C              | -2.45427                | -0.19698 | -0.15218 |
| C              | -3.38972                | -0.79552 | -0.98644 |
| C              | -1.2098                 | 1.51837  | 0.83864  |
| C              | -1.43565                | -0.78431 | 0.726411 |
| C              | -0.68353                | 0.21594  | 1.395782 |
| C              | -0.70326                | 2.744306 | 1.046032 |
| C              | 0.644251                | 2.992878 | 1.555367 |
| C              | 1.730981                | 2.43132  | 1.00632  |
| Te             | 1.78311                 | 1.223388 | -0.73392 |
| C              | -0.18185                | 0.122848 | 2.813042 |
| Pt             | 0.548711                | -0.96058 | 0.024529 |
| Cl             | -1.6342                 | -2.42098 | 1.33849  |
| H              | -4.98653                | -0.40248 | -2.36613 |
| H              | -4.81076                | 2.053392 | -2.18497 |
| H              | -3.10849                | 3.10072  | -0.72619 |
| H              | -3.45432                | -1.87579 | -1.07112 |
| H              | -1.2698                 | 3.613319 | 0.712133 |
| H              | 0.772966                | 3.714228 | 2.36273  |
| H              | 2.7148                  | 2.660267 | 1.40982  |
| H              | 0.749789                | 0.6766   | 2.941085 |
| H              | -0.93144                | 0.552561 | 3.488754 |
| H              | -0.0083                 | -0.91515 | 3.105956 |
| Cl             | 2.126684                | -2.25072 | -1.10508 |

**Table S15.** Calculated orientation for intermediate **f** ( $E = -1808.916374$  Hartree).

| Atomic<br>Name | Coordinates (Angstroms) |          |          |
|----------------|-------------------------|----------|----------|
|                | X                       | Y        | Z        |
| C              | -6.94666                | -1.10971 | 0.545692 |
| C              | -6.16728                | -2.24994 | 0.731744 |
| C              | -4.77988                | -2.2044  | 0.563969 |
| C              | -4.19343                | -0.99913 | 0.21065  |
| C              | -4.98613                | 0.14505  | 0.024573 |
| C              | -6.36089                | 0.107828 | 0.187332 |
| C              | -2.78283                | -0.62669 | -0.04636 |
| C              | -4.06856                | 1.228723 | -0.33537 |
| C              | -2.77953                | 0.817187 | -0.38401 |
| C              | -1.75821                | -1.50659 | 0.045549 |
| C              | -0.36495                | -1.24119 | -0.22203 |
| C              | 0.6165                  | -2.1314  | 0.025815 |
| Te             | 2.634064                | -1.70103 | -0.2504  |
| C              | -1.59086                | 1.673023 | -0.68572 |
| Pt             | 2.618191                | 0.770778 | -0.12306 |
| Cl             | -4.63602                | 2.834414 | -0.63972 |
| H              | -8.02255                | -1.16642 | 0.680813 |
| H              | -6.64194                | -3.18583 | 1.010464 |
| H              | -4.18513                | -3.1015  | 0.71185  |
| H              | -6.96767                | 0.99642  | 0.041897 |
| H              | -1.99474                | -2.52321 | 0.356018 |
| H              | -0.09014                | -0.27389 | -0.62712 |
| H              | 0.400448                | -3.11363 | 0.441153 |
| H              | -0.85836                | 1.643798 | 0.12969  |
| H              | -1.08569                | 1.356207 | -1.60581 |
| H              | -1.89345                | 2.71445  | -0.81997 |
| Cl             | 2.702203                | 2.081473 | 1.717923 |

**Table S16.** Calculated orientation for intermediate **g** ( $E = -1808.941225$  Hartree).

| Atomic<br>Name | Coordinates (Angstroms) |          |          |
|----------------|-------------------------|----------|----------|
|                | X                       | Y        | Z        |
| C              | 6.367248                | -1.81418 | -0.79325 |
| C              | 5.302882                | -2.69375 | -0.98045 |
| C              | 3.981001                | -2.25663 | -0.85027 |
| C              | 3.751704                | -0.92824 | -0.52909 |
| C              | 4.829449                | -0.04818 | -0.34249 |
| C              | 6.140941                | -0.47295 | -0.47041 |
| C              | 2.49812                 | -0.1653  | -0.31884 |
| C              | 4.247403                | 1.257354 | -0.01634 |
| C              | 2.894983                | 1.225869 | 0.004284 |
| C              | 1.273949                | -0.72592 | -0.4071  |
| C              | -0.01416                | -0.06994 | -0.24054 |
| C              | -1.23754                | -0.77935 | -0.51416 |
| Te             | -1.24715                | -0.57203 | 1.70067  |
| C              | 1.980649                | 2.366642 | 0.312487 |
| Pt             | -2.95541                | 0.079844 | -0.3106  |
| Cl             | 5.236389                | 2.63872  | 0.302799 |
| H              | 7.386103                | -2.17408 | -0.89932 |
| H              | 5.500507                | -3.73145 | -1.23091 |
| H              | 3.161926                | -2.95429 | -1.00112 |
| H              | 6.970136                | 0.212491 | -0.32463 |
| H              | 1.221277                | -1.79339 | -0.61682 |
| H              | -0.05948                | 1.012191 | -0.26158 |
| H              | -1.18778                | -1.78105 | -0.94412 |
| H              | 1.373467                | 2.641117 | -0.55848 |
| H              | 1.301976                | 2.125312 | 1.13864  |
| H              | 2.553174                | 3.250998 | 0.602584 |
| Cl             | -4.35097                | 0.734069 | -2.02251 |

**Table S17.** Calculated orientation for transition state **tsgh** ( $E = -1808.898441$  Hartree).

| Atomic<br>Name | Coordinates (Angstroms) |          |          |
|----------------|-------------------------|----------|----------|
|                | X                       | Y        | Z        |
| C              | 6.525697                | -1.63011 | -1.17342 |
| C              | 5.454803                | -2.26104 | -1.805   |
| C              | 4.141326                | -1.83988 | -1.57957 |
| C              | 3.922376                | -0.77881 | -0.71344 |
| C              | 5.007527                | -0.14774 | -0.0819  |
| C              | 6.312139                | -0.5605  | -0.30014 |
| C              | 2.68036                 | -0.10623 | -0.27051 |
| C              | 4.440052                | 0.916009 | 0.747694 |
| C              | 3.089547                | 0.969379 | 0.659503 |
| C              | 1.449602                | -0.48292 | -0.69209 |
| C              | 0.169585                | 0.081876 | -0.33665 |
| C              | -0.97324                | -0.42105 | -0.86211 |
| Te             | -2.54807                | -1.34589 | 1.366369 |
| C              | 2.19124                 | 1.933557 | 1.364138 |
| Pt             | -2.74991                | 0.322202 | -0.50451 |
| Cl             | 5.439359                | 1.95478  | 1.706585 |
| H              | 7.538628                | -1.97268 | -1.36245 |
| H              | 5.642088                | -3.08937 | -2.48162 |
| H              | 3.317834                | -2.34068 | -2.08117 |
| H              | 7.145784                | -0.06801 | 0.191314 |
| H              | 1.403282                | -1.32043 | -1.38667 |
| H              | 0.122313                | 0.926226 | 0.340193 |
| H              | -0.95855                | -1.26078 | -1.55612 |
| H              | 1.606499                | 2.528037 | 0.653002 |
| H              | 1.490336                | 1.415113 | 2.028757 |
| H              | 2.774056                | 2.626998 | 1.975471 |
| Cl             | -2.47206                | 2.361379 | -1.57475 |

**Table S18.** Calculated orientation for intermediate **h** ( $E = -1808.903489$  Hartree).

| Atomic<br>Name | Coordinates (Angstroms) |          |          |
|----------------|-------------------------|----------|----------|
|                | X                       | Y        | Z        |
| C              | 6.663164                | -1.98614 | -0.72625 |
| C              | 5.579953                | -2.70154 | -1.23641 |
| C              | 4.27593                 | -2.21811 | -1.1035  |
| C              | 4.076224                | -1.0084  | -0.45366 |
| C              | 5.173465                | -0.29411 | 0.057404 |
| C              | 6.470007                | -0.76861 | -0.07045 |
| C              | 2.847819                | -0.23841 | -0.15342 |
| C              | 4.628776                | 0.916678 | 0.670234 |
| C              | 3.280348                | 0.982122 | 0.565387 |
| C              | 1.611396                | -0.65218 | -0.51277 |
| C              | 0.342341                | 0.003686 | -0.27282 |
| C              | -0.79779                | -0.51719 | -0.75202 |
| Te             | -3.37155                | -1.16537 | 1.222003 |
| C              | 2.404536                | 2.082719 | 1.070442 |
| Pt             | -2.54676                | 0.335596 | -0.56715 |
| Cl             | 5.650773                | 2.095879 | 1.424495 |
| H              | 7.668853                | -2.37965 | -0.84032 |
| H              | 5.750997                | -3.64628 | -1.74385 |
| H              | 3.443293                | -2.78792 | -1.50702 |
| H              | 7.312289                | -0.21011 | 0.326859 |
| H              | 1.546027                | -1.59457 | -1.05514 |
| H              | 0.317525                | 0.930374 | 0.286079 |
| H              | -0.83125                | -1.45758 | -1.30247 |
| H              | 1.827783                | 2.540302 | 0.258561 |
| H              | 1.696694                | 1.71727  | 1.823511 |
| H              | 3.004395                | 2.869115 | 1.535438 |
| Cl             | -1.95109                | 2.424057 | -1.39985 |

**Table S19.** Calculated orientation for intermediate **i** ( $E = -1540.882591$  Hartree).

| Atomic | Coordinates (Angstroms) |          |          |
|--------|-------------------------|----------|----------|
| Name   | X                       | Y        | Z        |
| C      | 5.960354                | -1.96207 | -0.04017 |
| C      | 4.901205                | -2.86707 | 0.019125 |
| C      | 3.579216                | -2.41882 | 0.084226 |
| C      | 3.339696                | -1.05273 | 0.088895 |
| C      | 4.412536                | -0.14766 | 0.02996  |
| C      | 5.726038                | -0.58497 | -0.03508 |
| C      | 2.082383                | -0.27156 | 0.142691 |
| C      | 3.823842                | 1.192137 | 0.051574 |
| C      | 2.472042                | 1.157344 | 0.117533 |
| C      | 0.860549                | -0.84977 | 0.192378 |
| C      | -0.43442                | -0.20278 | 0.234392 |
| C      | -1.58107                | -0.91823 | 0.185114 |
| C      | 1.556282                | 2.337613 | 0.158879 |
| Pt     | -3.14789                | -0.01    | -0.38041 |
| Cl     | 4.803571                | 2.61885  | -0.00349 |
| H      | 6.980241                | -2.33129 | -0.09098 |
| H      | 5.104729                | -3.93362 | 0.014598 |
| H      | 2.764195                | -3.13599 | 0.130491 |
| H      | 6.55044                 | 0.120234 | -0.08142 |
| H      | 0.828682                | -1.93831 | 0.188161 |
| H      | -0.48582                | 0.880002 | 0.286924 |
| H      | -1.6316                 | -2.00201 | 0.305134 |
| H      | 0.869879                | 2.342663 | -0.69599 |
| H      | 0.956162                | 2.346008 | 1.075905 |
| H      | 2.1269                  | 3.269158 | 0.129715 |
| Cl     | -4.72828                | 0.010223 | 1.240701 |

**Table S20.** Calculated orientation for intermediate **j** ( $E = -769.1789245$  Hartree).

| Atomic<br>Name | Coordinates (Angstroms) |          |          |
|----------------|-------------------------|----------|----------|
|                | X                       | Y        | Z        |
| C              | -0.07112                | -0.96986 | 0.313432 |
| C              | 1.216747                | 1.740499 | 0.319056 |
| C              | 0.61465                 | 2.776723 | 0.482997 |
| C              | -0.16518                | 3.992552 | 0.681225 |
| Te             | -1.63099                | 0.157164 | -0.50113 |
| C              | -2.7667                 | -1.32908 | 0.35852  |
| C              | -2.0012                 | -2.23473 | 1.015463 |
| C              | -0.57796                | -2.04672 | 0.981082 |
| H              | -1.2325                 | 3.787176 | 0.538118 |
| H              | -0.03001                | 4.384229 | 1.695374 |
| H              | 0.131707                | 4.773299 | -0.02731 |
| H              | -3.84932                | -1.33963 | 0.311804 |
| H              | -2.43996                | -3.07186 | 1.551686 |
| H              | 0.084042                | -2.74554 | 1.486376 |
| C              | 4.154944                | -0.45921 | -0.27165 |
| C              | 3.359733                | 0.659346 | -0.07052 |
| C              | 1.974027                | 0.541014 | 0.115948 |
| C              | 1.369145                | -0.73762 | 0.10189  |
| C              | 2.194859                | -1.84973 | -0.12389 |
| C              | 3.566168                | -1.72079 | -0.29973 |
| H              | 5.225097                | -0.34583 | -0.41515 |
| H              | 3.802314                | 1.650299 | -0.05109 |
| H              | 1.739588                | -2.83335 | -0.18162 |
| H              | 4.171516                | -2.60571 | -0.47233 |

**Table S21.** Calculated orientation for intermediate **k** ( $E = -2310.115869$  Hartree).

| Atomic | Coordinates (Angstroms) |          |          |
|--------|-------------------------|----------|----------|
| Name   | X                       | Y        | Z        |
| C      | 4.70878                 | 3.079869 | -0.01756 |
| C      | 3.723814                | 4.058732 | -0.12812 |
| C      | 2.40104                 | 3.754577 | 0.16758  |
| C      | 2.018766                | 2.474276 | 0.587334 |
| C      | 3.025269                | 1.488169 | 0.692325 |
| C      | 4.356113                | 1.800393 | 0.384949 |
| C      | 0.605496                | 2.179917 | 0.875702 |
| C      | 2.70204                 | 0.127143 | 1.058975 |
| C      | 2.301999                | -0.87623 | 1.703116 |
| C      | 0.104395                | 1.609331 | 2.004714 |
| C      | -1.31607                | 1.399427 | 2.08939  |
| C      | -2.07132                | 1.778808 | 1.0292   |
| Te     | -0.92929                | 2.595756 | -0.47324 |
| C      | 1.776112                | -1.61863 | 2.859678 |
| Pt     | 2.745879                | -1.54366 | -0.22282 |
| Cl     | 3.423757                | -2.93608 | -1.99269 |
| H      | 5.743538                | 3.309448 | -0.25035 |
| H      | 3.985615                | 5.063706 | -0.44471 |
| H      | 1.639535                | 4.525481 | 0.087759 |
| H      | 5.108899                | 1.021501 | 0.460769 |
| H      | 0.758169                | 1.345563 | 2.832009 |
| H      | -1.76663                | 0.959321 | 2.975011 |
| H      | -3.14628                | 1.670396 | 0.95116  |
| H      | 2.391148                | -2.49578 | 3.078488 |
| H      | 1.757594                | -0.9676  | 3.739533 |
| H      | 0.756564                | -1.96351 | 2.658018 |
| C      | 0.980786                | -1.25488 | -1.00289 |
| C      | -0.18176                | -1.47889 | -0.37667 |
| H      | 1.028824                | -0.86719 | -2.02073 |



---

|    |          |          |          |
|----|----------|----------|----------|
| C  | -1.43819 | -1.15989 | -1.02318 |
| H  | -0.19448 | -1.86153 | 0.635039 |
| C  | -2.683   | -1.1869  | -0.4976  |
| H  | -1.34488 | -0.79631 | -2.04571 |
| C  | -3.86988 | -0.67119 | -1.20968 |
| C  | -3.1426  | -1.5847  | 0.849929 |
| C  | -4.03103 | -0.14991 | -2.48744 |
| C  | -4.96664 | -0.72776 | -0.33002 |
| C  | -4.46549 | -1.30005 | 0.915792 |
| C  | -2.31147 | -2.18401 | 1.936737 |
| C  | -5.29331 | 0.302982 | -2.87449 |
| H  | -3.19735 | -0.09417 | -3.18229 |
| C  | -6.22343 | -0.27509 | -0.70937 |
| Cl | -5.49703 | -1.55528 | 2.289225 |
| H  | -2.93374 | -2.46711 | 2.789828 |
| H  | -1.78906 | -3.08241 | 1.589503 |
| H  | -1.5602  | -1.46899 | 2.293139 |
| C  | -6.37698 | 0.241161 | -1.99607 |
| H  | -5.43345 | 0.708319 | -3.87227 |
| H  | -7.06422 | -0.32021 | -0.02332 |
| H  | -7.35026 | 0.600154 | -2.31748 |

---

**Table S22.** Calculated orientation for transition state **tskl** ( $E = -2310.060142$  Hartree).

| Atomic | Coordinates (Angstroms) |          |          |
|--------|-------------------------|----------|----------|
| Name   | X                       | Y        | Z        |
| C      | 6.157425                | 0.575192 | 2.106572 |
| C      | 5.990924                | 1.943393 | 1.872288 |
| C      | 4.817541                | 2.443384 | 1.318181 |
| C      | 3.757902                | 1.596331 | 0.978061 |
| C      | 3.921332                | 0.205099 | 1.246174 |
| C      | 5.126683                | -0.28782 | 1.795207 |
| C      | 2.538075                | 2.181654 | 0.402862 |
| C      | 2.850193                | -0.67449 | 1.061294 |
| C      | 1.663382                | -1.18726 | 1.134567 |
| C      | 1.885217                | 3.244102 | 0.958473 |
| C      | 0.766304                | 3.801818 | 0.254905 |
| C      | 0.452016                | 3.24934  | -0.94433 |
| Te     | 1.678657                | 1.672992 | -1.42835 |
| C      | 0.794491                | -0.91938 | 2.341615 |
| Pt     | 1.172142                | -2.24798 | -0.43968 |
| Cl     | 3.562317                | -2.04488 | -1.03538 |
| H      | 7.083183                | 0.198074 | 2.527203 |
| H      | 6.7959                  | 2.631325 | 2.113643 |
| H      | 4.723592                | 3.505554 | 1.118295 |
| H      | 5.216971                | -1.35566 | 1.963897 |
| H      | 2.20244                 | 3.648937 | 1.916508 |
| H      | 0.202704                | 4.633902 | 0.666837 |
| H      | 0.357876                | 3.572872 | -1.58762 |

---

|    |          |          |          |
|----|----------|----------|----------|
| H  | 0.433141 | -1.86506 | 2.753323 |
| H  | 1.340452 | -0.37174 | 3.115771 |
| H  | 0.074324 | -0.33321 | 2.032375 |
| C  | 0.753661 | -2.33635 | -0.04083 |
| C  | 1.614827 | -1.29657 | -0.11901 |
| H  | 1.174129 | -3.3158  | 0.22324  |
| C  | 3.034316 | -1.4448  | 0.114841 |
| H  | 1.227471 | -0.30825 | -0.34581 |
| C  | 4.002649 | -0.49709 | 0.138821 |
| H  | 3.355253 | -2.46961 | 0.307016 |
| C  | 5.425155 | -0.79548 | 0.402828 |
| C  | 3.912568 | 0.966154 | -0.05739 |
| C  | 6.09219  | -1.988   | 0.656333 |
| C  | 6.141741 | 0.415273 | 0.368503 |
| C  | 5.166579 | 1.461326 | 0.083088 |
| C  | 2.678442 | 1.757064 | -0.35046 |
| C  | 7.470105 | -1.95624 | 0.874337 |
| H  | 5.559371 | -2.93482 | 0.686123 |
| C  | 7.513214 | 0.451934 | 0.584844 |
| Cl | 5.624773 | 3.132722 | -0.04722 |
| H  | 2.913928 | 2.821038 | -0.43929 |
| H  | 1.929463 | 1.647506 | 0.441675 |
| H  | 2.213869 | 1.435153 | -1.28948 |
| C  | 8.17314  | -0.74991 | 0.83942  |
| H  | 8.00205  | -2.88206 | 1.073547 |
| H  | 8.05802  | 1.391143 | 0.556647 |
| H  | 9.245478 | -0.74749 | 1.011873 |

---

**Table S23.** Calculated orientation for intermediate **I** ( $E = -2310.078973$  Hartree).

| Atomic | Coordinates (Angstroms) |          |          |
|--------|-------------------------|----------|----------|
| Name   | X                       | Y        | Z        |
| C      | 5.985003                | 0.630583 | 2.395213 |
| C      | 5.709412                | 1.994853 | 2.340471 |
| C      | 4.567488                | 2.44692  | 1.692622 |
| C      | 3.66457                 | 1.557737 | 1.090315 |
| C      | 3.941203                | 0.175145 | 1.16736  |
| C      | 5.102948                | -0.26716 | 1.811069 |
| C      | 2.481096                | 2.128777 | 0.415218 |
| C      | 3.013131                | -0.81665 | 0.601679 |
| C      | 1.718302                | -1.0569  | 0.818037 |
| C      | 1.655997                | 3.055378 | 0.978327 |
| C      | 0.593642                | 3.608028 | 0.18167  |
| C      | 0.489858                | 3.182108 | -1.10135 |
| Te     | 1.92714                 | 1.782297 | -1.56664 |
| C      | 0.892021                | -0.35484 | 1.846857 |
| Pt     | 1.06528                 | -2.42114 | -0.42884 |
| Cl     | 3.705946                | -1.91337 | -0.67166 |
| H      | 6.878582                | 0.268239 | 2.893838 |
| H      | 6.391116                | 2.709941 | 2.79111  |
| H      | 4.370829                | 3.512262 | 1.622375 |
| H      | 5.300975                | -1.33405 | 1.862076 |
| H      | 1.793463                | 3.359077 | 2.013416 |
| H      | 0.096678                | 4.336929 | 0.597261 |
| H      | 0.256737                | 3.511803 | -1.81397 |
| H      | 1.524065                | 0.214706 | 2.535187 |

---

|    |          |          |          |
|----|----------|----------|----------|
| H  | 0.195707 | 0.341397 | 1.367349 |
| H  | 0.300551 | -1.07547 | 2.418127 |
| C  | 0.839679 | -2.41846 | -0.03054 |
| C  | 1.66447  | -1.35416 | -0.11469 |
| H  | 1.266408 | -3.39227 | 0.240024 |
| C  | 3.08507  | -1.46512 | 0.138859 |
| H  | 1.252218 | -0.38199 | -0.36011 |
| C  | 4.023909 | -0.48996 | 0.162331 |
| H  | 3.431445 | -2.47863 | 0.343904 |
| C  | 5.453706 | -0.74668 | 0.436423 |
| C  | 3.893182 | 0.969241 | -0.04662 |
| C  | 6.151073 | -1.91748 | 0.705546 |
| C  | 6.135983 | 0.482769 | 0.392225 |
| C  | 5.132258 | 1.499318 | 0.093304 |
| C  | 2.636491 | 1.72278  | -0.34083 |
| C  | 7.526949 | -1.84515 | 0.929381 |
| H  | 5.644334 | -2.87816 | 0.744362 |
| C  | 7.504313 | 0.56027  | 0.613674 |
| Cl | 5.5445   | 3.18061  | -0.04777 |
| H  | 1.891461 | 1.586987 | 0.450884 |
| H  | 2.181026 | 1.393231 | -1.28157 |
| H  | 2.838463 | 2.793907 | -0.42442 |
| C  | 8.196083 | -0.6206  | 0.884098 |
| H  | 8.083176 | -2.75352 | 1.141841 |
| H  | 8.023    | 1.513826 | 0.578002 |
| H  | 9.267049 | -0.58652 | 1.061418 |

---

**Table S24.** Calculated orientation for transition state **tslm** ( $E = -2310.044324$  Hartree).

| Atomic | Coordinates (Angstroms) |          |          |
|--------|-------------------------|----------|----------|
| Name   | X                       | Y        | Z        |
| C      | -6.88673                | -0.03713 | 0.580893 |
| C      | -6.60243                | -1.39376 | 0.712288 |
| C      | -5.28518                | -1.82861 | 0.660025 |
| C      | -4.22281                | -0.93023 | 0.486976 |
| C      | -4.51494                | 0.448534 | 0.3657   |
| C      | -5.85012                | 0.867923 | 0.405876 |
| C      | -2.8587                 | -1.51    | 0.451353 |
| C      | -3.42724                | 1.449394 | 0.210696 |
| C      | -2.41135                | 1.561089 | 1.144692 |
| C      | -2.24827                | -2.11351 | 1.501518 |
| C      | -0.94552                | -2.70566 | 1.310592 |
| C      | -0.40272                | -2.64906 | 0.074307 |
| Te     | -1.64072                | -1.67255 | -1.26143 |
| C      | -2.44903                | 1.28108  | 2.603879 |
| Pt     | -1.06148                | 1.138304 | -0.08771 |
| Cl     | -3.70733                | 2.661517 | -1.04802 |
| H      | -7.91266                | 0.31583  | 0.617113 |
| H      | -7.40408                | -2.11317 | 0.847881 |
| H      | -5.05781                | -2.88692 | 0.742388 |
| H      | -6.06749                | 1.926601 | 0.30494  |
| H      | -2.73257                | -2.1335  | 2.474683 |
| H      | -0.42359                | -3.1799  | 2.136647 |
| H      | 0.561494                | -3.05097 | -0.21073 |

---

|    |          |          |          |
|----|----------|----------|----------|
| H  | -3.43815 | 0.920488 | 2.908015 |
| H  | -1.67589 | 0.564979 | 2.895132 |
| H  | -2.25007 | 2.219797 | 3.136166 |
| C  | 0.8159   | 1.75326  | -0.08003 |
| C  | 1.835141 | 0.870567 | 0.01242  |
| H  | 1.051579 | 2.816767 | -0.16155 |
| C  | 3.225418 | 1.27477  | -0.0151  |
| H  | 1.610609 | -0.18625 | 0.119461 |
| C  | 4.337262 | 0.506226 | 0.056204 |
| H  | 3.38085  | 2.350656 | -0.10056 |
| C  | 5.709189 | 1.054849 | 0.03797  |
| C  | 4.478247 | -0.96162 | 0.166822 |
| C  | 6.187158 | 2.355487 | -0.05138 |
| C  | 6.612172 | -0.01837 | 0.137213 |
| C  | 5.804904 | -1.23163 | 0.212284 |
| C  | 3.374193 | -1.96937 | 0.204241 |
| C  | 7.566389 | 2.567745 | -0.04194 |
| H  | 5.508693 | 3.200908 | -0.1285  |
| C  | 7.984501 | 0.186428 | 0.14797  |
| Cl | 6.523412 | -2.80485 | 0.338146 |
| H  | 2.714585 | -1.81267 | 1.065549 |
| H  | 2.758859 | -1.9089  | -0.7014  |
| H  | 3.782214 | -2.98132 | 0.26972  |
| C  | 8.455333 | 1.495924 | 0.056753 |
| H  | 7.952392 | 3.58036  | -0.11244 |
| H  | 8.671062 | -0.65134 | 0.225043 |
| H  | 9.524852 | 1.683876 | 0.062498 |

---

**Table S25.** Calculated orientation for intermediate **m** ( $E = -2310.055764$  Hartree).

| Atomic | Coordinates (Angstroms) |          |          |
|--------|-------------------------|----------|----------|
| Name   | X                       | Y        | Z        |
| C      | 6.677554                | 0.596751 | 0.953087 |
| C      | 6.339379                | 1.89469  | 0.581527 |
| C      | 5.030331                | 2.185454 | 0.224932 |
| C      | 4.027973                | 1.202745 | 0.236414 |
| C      | 4.373521                | -0.11635 | 0.617467 |
| C      | 5.702291                | -0.3901  | 0.965129 |
| C      | 2.671746                | 1.650682 | -0.15093 |
| C      | 3.35701                 | -1.21231 | 0.701086 |
| C      | 2.313415                | -1.20194 | 1.639072 |
| C      | 1.969321                | 2.636967 | 0.451637 |
| C      | 0.658914                | 2.985354 | -0.06568 |
| C      | 0.185092                | 2.296258 | -1.12208 |
| Te     | 1.55223                 | 0.883202 | -1.78486 |
| C      | 2.2442                  | -0.56031 | 2.970434 |
| Pt     | 1.224461                | -1.05021 | 0.103414 |
| Cl     | 3.91619                 | -2.76358 | -0.00195 |
| H      | 7.696774                | 0.352348 | 1.236075 |
| H      | 7.091601                | 2.677368 | 0.563028 |
| H      | 4.764499                | 3.191694 | -0.08416 |
| H      | 5.96774                 | -1.39998 | 1.261264 |
| H      | 2.363914                | 3.134284 | 1.334015 |
| H      | 0.074317                | 3.772342 | 0.403142 |
| H      | 0.770738                | 2.44714  | -1.60851 |
| H      | 3.036572                | 0.189481 | 3.092131 |



---

|    |          |          |          |
|----|----------|----------|----------|
| H  | 1.265    | -0.11184 | 3.155574 |
| H  | 2.40743  | -1.3373  | 3.730295 |
| C  | 0.706292 | -1.5326  | -0.2121  |
| C  | 1.749411 | -0.72072 | 0.075268 |
| H  | 0.945688 | -2.52863 | -0.60047 |
| C  | 3.124202 | -1.1235  | -0.11266 |
| H  | 1.554533 | 0.276143 | 0.457717 |
| C  | 4.264165 | -0.42488 | 0.117381 |
| H  | 3.247312 | -2.13403 | -0.50542 |
| C  | 5.61411  | -0.9585  | -0.15033 |
| C  | 4.453914 | 0.943311 | 0.643044 |
| C  | 6.049033 | -2.18221 | -0.64713 |
| C  | 6.554602 | 0.032628 | 0.190194 |
| C  | 5.789838 | 1.175836 | 0.670752 |
| C  | 3.384724 | 1.894907 | 1.074723 |
| C  | 7.418528 | -2.40107 | -0.79709 |
| H  | 5.342571 | -2.96285 | -0.91682 |
| C  | 7.919521 | -0.18115 | 0.04182  |
| Cl | 6.561994 | 2.638936 | 1.206687 |
| H  | 2.777655 | 1.471318 | 1.882786 |
| H  | 2.708025 | 2.139833 | 0.247854 |
| H  | 3.822254 | 2.828892 | 1.437542 |
| C  | 8.344425 | -1.4117  | -0.45647 |
| H  | 7.769047 | -3.35389 | -1.18327 |
| H  | 8.636837 | 0.590068 | 0.3074   |
| H  | 9.406305 | -1.60318 | -0.58114 |

---

**Table S26.** Calculated orientation for transition state **tsmn** ( $E = -2310.033874$  Hartree).

| Atomic | Coordinates (Angstroms) |          |          |
|--------|-------------------------|----------|----------|
| Name   | X                       | Y        | Z        |
| C      | -6.62677                | 0.498986 | -0.23168 |
| C      | -6.23835                | 1.827291 | -0.35253 |
| C      | -4.90207                | 2.154598 | -0.1676  |
| C      | -3.94144                | 1.186725 | 0.14667  |
| C      | -4.33796                | -0.16614 | 0.284042 |
| C      | -5.68974                | -0.47702 | 0.082763 |
| C      | -2.54112                | 1.646154 | 0.271885 |
| C      | -3.36317                | -1.24626 | 0.625379 |
| C      | -2.20683                | -1.10212 | 1.417515 |
| C      | -1.87108                | 1.97264  | 1.410463 |
| C      | -0.51232                | 2.432279 | 1.292907 |
| C      | 0.007459                | 2.538984 | 0.043785 |
| Te     | -1.34829                | 2.003084 | -1.40508 |
| C      | -1.81913                | -0.94929 | 2.821239 |
| Pt     | -1.32639                | -1.41268 | -0.16368 |
| Cl     | -4.07004                | -2.88525 | 0.878258 |
| H      | -7.6633                 | 0.211751 | -0.38034 |
| H      | -6.96194                | 2.599778 | -0.59318 |
| H      | -4.57529                | 3.185618 | -0.26832 |
| H      | -6.02207                | -1.50349 | 0.171499 |
| H      | -2.35453                | 1.895078 | 2.380542 |
| H      | 0.067871                | 2.692964 | 2.174147 |
| H      | 1.008444                | 2.879409 | -0.19306 |

---

|    |          |          |          |
|----|----------|----------|----------|
| H  | -2.53663 | -0.32546 | 3.362928 |
| H  | -1.8564  | -1.95913 | 3.257325 |
| H  | -0.79845 | -0.57471 | 2.92333  |
| C  | 0.635661 | -1.65222 | -0.66064 |
| C  | 1.665862 | -0.95255 | -0.13023 |
| H  | 0.917125 | -2.39054 | -1.42355 |
| C  | 3.039678 | -1.14487 | -0.54585 |
| H  | 1.462719 | -0.20304 | 0.627505 |
| C  | 4.165604 | -0.53529 | -0.10236 |
| H  | 3.16984  | -1.88516 | -1.33657 |
| C  | 5.509154 | -0.81188 | -0.65189 |
| C  | 4.348717 | 0.484823 | 0.953075 |
| C  | 5.943768 | -1.67255 | -1.65249 |
| C  | 6.437019 | -0.00048 | 0.026843 |
| C  | 5.672504 | 0.771944 | 0.999975 |
| C  | 3.284576 | 1.077116 | 1.819325 |
| C  | 7.304031 | -1.71309 | -1.96194 |
| H  | 5.246012 | -2.30841 | -2.19086 |
| C  | 7.791229 | -0.03604 | -0.27834 |
| Cl | 6.434133 | 1.90819  | 2.071325 |
| H  | 2.53631  | 1.612002 | 1.224025 |
| H  | 2.759304 | 0.301265 | 2.388025 |
| H  | 3.715374 | 1.784322 | 2.533163 |
| C  | 8.217762 | -0.90406 | -1.28318 |
| H  | 7.655696 | -2.38298 | -2.74125 |
| H  | 8.499731 | 0.594582 | 0.250837 |
| H  | 9.271945 | -0.95092 | -1.54034 |

---

**Table S27.** Calculated orientation for intermediate **n** ( $E = -2310.073502$  Hartree).

| Atomic | Coordinates (Angstroms) |          |          |
|--------|-------------------------|----------|----------|
| Name   | X                       | Y        | Z        |
| C      | -6.96625                | 0.582147 | -0.87325 |
| C      | -6.45345                | 1.819051 | -1.25178 |
| C      | -5.14698                | 2.137996 | -0.91257 |
| C      | -4.33875                | 1.249077 | -0.18991 |
| C      | -4.85526                | -0.0035  | 0.206475 |
| C      | -6.17817                | -0.30421 | -0.15362 |
| C      | -4.08094                | -1.01063 | 0.978776 |
| C      | -2.95775                | 1.68811  | 0.081001 |
| C      | -2.49936                | 2.502641 | 1.046427 |
| C      | -1.07414                | 2.823353 | 1.071612 |
| C      | -0.27292                | 2.272935 | 0.14531  |
| Te     | -1.37375                | 1.114619 | -1.19906 |
| Cl     | -5.07155                | -1.82339 | 2.248768 |
| C      | -2.82281                | -1.41651 | 0.832032 |
| Pt     | -1.0555                 | -1.13514 | -0.12394 |
| C      | -2.18673                | -2.54602 | 1.590983 |
| H      | -7.98273                | 0.304529 | -1.13534 |
| H      | -7.06223                | 2.52742  | -1.80504 |
| H      | -4.72929                | 3.09804  | -1.20265 |
| H      | -6.59605                | -1.2607  | 0.140644 |
| H      | -3.16653                | 2.892332 | 1.810397 |
| H      | -0.67765                | 3.484745 | 1.837375 |
| H      | 0.7935                  | 2.42474  | 0.038322 |
| H      | -2.05304                | -2.33265 | 2.656288 |

---

|    |          |          |          |
|----|----------|----------|----------|
| H  | -2.7079  | -3.49876 | 1.451376 |
| H  | -1.12774 | -2.76639 | 1.219404 |
| C  | 0.9041   | -1.25594 | -0.73166 |
| C  | 1.963991 | -0.64921 | -0.14527 |
| H  | 1.15746  | -1.90426 | -1.58262 |
| C  | 3.327136 | -0.8551  | -0.58718 |
| H  | 1.793524 | 0.019108 | 0.694495 |
| C  | 4.485279 | -0.33653 | -0.10944 |
| H  | 3.419824 | -1.53075 | -1.43925 |
| C  | 5.809713 | -0.63545 | -0.69031 |
| C  | 4.724498 | 0.59124  | 1.016079 |
| C  | 6.197987 | -1.43973 | -1.75591 |
| C  | 6.781    | 0.075238 | 0.040225 |
| C  | 6.061621 | 0.80935  | 1.073332 |
| C  | 3.695888 | 1.174865 | 1.930136 |
| C  | 7.552577 | -1.5243  | -2.07855 |
| H  | 5.467246 | -1.99909 | -2.33416 |
| C  | 8.131085 | -0.00568 | -0.27805 |
| Cl | 6.883266 | 1.8271   | 2.2186   |
| H  | 2.975455 | 1.792075 | 1.380652 |
| H  | 3.132379 | 0.390699 | 2.44782  |
| H  | 4.165776 | 1.807086 | 2.688284 |
| C  | 8.509297 | -0.81503 | -1.34821 |
| H  | 7.866821 | -2.15068 | -2.9085  |
| H  | 8.872639 | 0.54661  | 0.291952 |
| H  | 9.558749 | -0.89538 | -1.6164  |

---

**Table S28.** Calculated orientation for transition state **tsno** ( $E = -2310.036109$  Hartree).

| Atomic | Coordinates (Angstroms) |          |          |
|--------|-------------------------|----------|----------|
| Name   | X                       | Y        | Z        |
| C      | -4.99548                | 0.622975 | 3.369085 |
| C      | -5.56307                | -0.52655 | 2.819486 |
| C      | -5.22647                | -0.92096 | 1.528551 |
| C      | -4.33843                | -0.15253 | 0.777483 |
| C      | -3.76524                | 1.004477 | 1.335707 |
| C      | -4.09953                | 1.390088 | 2.633594 |
| C      | -2.88244                | 1.755791 | 0.424597 |
| C      | -3.88089                | -0.55274 | -0.56385 |
| C      | -4.55238                | -0.52139 | -1.76694 |
| C      | -3.93428                | -1.15647 | -2.87503 |
| C      | -2.7806                 | -1.86783 | -2.67422 |
| Te     | -2.19182                | -1.92816 | -0.72062 |
| Cl     | -2.7829                 | 3.50846  | 0.700279 |
| C      | -2.57664                | 1.242069 | -0.81602 |
| Pt     | -1.01078                | 0.300688 | 0.005221 |
| C      | -2.60119                | 1.846751 | -2.17229 |
| H      | -5.25241                | 0.923605 | 4.38007  |
| H      | -6.26804                | -1.1155  | 3.397813 |
| H      | -5.65531                | -1.82016 | 1.095661 |
| H      | -3.6615                 | 2.28433  | 3.064029 |
| H      | -5.48159                | 0.031302 | -1.86675 |
| H      | -4.37445                | -1.09225 | -3.86675 |
| H      | -2.22916                | -2.38005 | -3.45345 |

---

|    |          |          |          |
|----|----------|----------|----------|
| H  | -2.42729 | 1.083696 | -2.93722 |
| H  | -3.55136 | 2.354031 | -2.36937 |
| H  | -1.7948  | 2.584077 | -2.25401 |
| C  | 0.828851 | -0.26928 | 0.672583 |
| C  | 2.025551 | 0.119434 | 0.163414 |
| H  | 0.905676 | -0.97572 | 1.511595 |
| C  | 3.279529 | -0.35613 | 0.698512 |
| H  | 2.054666 | 0.814101 | -0.67127 |
| C  | 4.556787 | -0.08346 | 0.325323 |
| H  | 3.168239 | -1.04453 | 1.538614 |
| C  | 5.737181 | -0.66532 | 0.990948 |
| C  | 5.072059 | 0.785915 | -0.74993 |
| C  | 5.863997 | -1.54623 | 2.06015  |
| C  | 6.891562 | -0.17372 | 0.349723 |
| C  | 6.426464 | 0.710465 | -0.70878 |
| C  | 4.260366 | 1.599483 | -1.70533 |
| C  | 7.13994  | -1.9256  | 2.47578  |
| H  | 4.988307 | -1.93757 | 2.571676 |
| C  | 8.165047 | -0.54991 | 0.761479 |
| Cl | 7.530679 | 1.54549  | -1.76341 |
| H  | 3.596146 | 0.965129 | -2.30348 |
| H  | 3.63566  | 2.327587 | -1.17547 |
| H  | 4.907507 | 2.150284 | -2.39331 |
| C  | 8.279401 | -1.43286 | 1.833502 |
| H  | 7.249071 | -2.61245 | 3.310386 |
| H  | 9.048703 | -0.1646  | 0.260679 |
| H  | 9.264027 | -1.74085 | 2.173623 |

---

**Table S29.** Calculated orientation for intermediate **o** ( $E = -2310.120708$  Hartree).

| Atomic | Coordinates (Angstroms) |          |          |
|--------|-------------------------|----------|----------|
| Name   | X                       | Y        | Z        |
| C      | 3.695173                | 4.230728 | -0.5283  |
| C      | 4.494957                | 3.649614 | -1.51655 |
| C      | 4.73675                 | 2.276815 | -1.53403 |
| C      | 4.191912                | 1.490152 | -0.52606 |
| C      | 3.382778                | 2.084732 | 0.464808 |
| C      | 3.119808                | 3.449591 | 0.470925 |
| C      | 2.922928                | 1.003496 | 1.353971 |
| C      | 4.197241                | 0.029049 | -0.30774 |
| C      | 4.674121                | -0.88517 | -1.18484 |
| C      | 4.362778                | -2.29555 | -1.26429 |
| C      | 3.18426                 | -2.9187  | -1.04411 |
| Te     | 1.212255                | -2.37664 | -0.60792 |
| Cl     | 2.3669                  | 1.344592 | 2.97439  |
| C      | 3.452453                | -0.22248 | 0.945704 |
| Pt     | 1.287671                | 0.117891 | 0.086057 |
| C      | 3.672916                | -1.37919 | 1.877178 |
| H      | 3.517528                | 5.301556 | -0.54186 |
| H      | 4.933936                | 4.278046 | -2.28563 |
| H      | 5.348242                | 1.838424 | -2.31725 |
| H      | 2.489039                | 3.892228 | 1.235846 |
| H      | 5.327097                | -0.51637 | -1.97604 |
| H      | 5.160018                | -2.92217 | -1.6654  |
| H      | 3.172318                | -3.99336 | -1.23414 |
| H      | 3.941348                | -2.29027 | 1.345119 |



---

|    |          |          |          |
|----|----------|----------|----------|
| H  | 4.496668 | -1.12338 | 2.556115 |
| H  | 2.785915 | -1.57785 | 2.483101 |
| C  | 0.464805 | 0.190289 | -0.82127 |
| C  | 1.643626 | 0.006114 | -0.18319 |
| H  | 0.479393 | 0.504191 | -1.87009 |
| C  | 2.909439 | 0.321459 | -0.81123 |
| H  | 1.643533 | -0.37569 | 0.832507 |
| C  | 4.160369 | 0.242144 | -0.29947 |
| H  | 2.825854 | 0.67362  | -1.83962 |
| C  | 5.373216 | 0.597669 | -1.06787 |
| C  | 4.622749 | -0.18035 | 1.041402 |
| C  | 5.547267 | 1.053107 | -2.36811 |
| C  | 6.490763 | 0.400886 | -0.23704 |
| C  | 5.973419 | -0.07562 | 1.042786 |
| C  | 3.769193 | -0.6354  | 2.180516 |
| C  | 6.842253 | 1.308085 | -2.82378 |
| H  | 4.699415 | 1.211603 | -3.02907 |
| C  | 7.779994 | 0.652617 | -0.68445 |
| Cl | 7.024613 | -0.44733 | 2.372752 |
| H  | 4.384028 | -0.87123 | 3.053007 |
| H  | 3.201785 | -1.53606 | 1.919234 |
| H  | 3.052074 | 0.138712 | 2.476332 |
| C  | 7.94558  | 1.110502 | -1.9922  |
| H  | 6.991574 | 1.664538 | -3.83877 |
| H  | 8.636957 | 0.49744  | -0.0356  |
| H  | 8.944398 | 1.314616 | -2.36664 |

---

**Table S30.** Calculated orientation for intermediate **p** ( $E = -2310.102399$  Hartree).

| Atomic | Coordinates (Angstroms) |          |          |
|--------|-------------------------|----------|----------|
| Name   | X                       | Y        | Z        |
| C      | 4.954734                | -4.67395 | -0.91332 |
| C      | 4.151511                | -4.5322  | -2.04593 |
| C      | 2.880368                | -3.96194 | -1.95549 |
| C      | 2.425832                | -3.53701 | -0.71411 |
| C      | 3.241269                | -3.68412 | 0.421608 |
| C      | 4.505804                | -4.2491  | 0.337598 |
| C      | 1.161892                | -2.89573 | -0.29237 |
| C      | 2.483158                | -3.14363 | 1.546983 |
| C      | 1.267082                | -2.68121 | 1.169852 |
| C      | 0.177308                | -2.55223 | -1.15378 |
| C      | -1.0699                 | -1.88339 | -0.85039 |
| C      | -1.91754                | -1.46352 | -1.80484 |
| Te     | -3.70542                | -0.41015 | -1.50506 |
| C      | 0.245991                | -2.05512 | 2.065463 |
| Pt     | -3.37078                | 0.239946 | 0.938083 |
| Cl     | 3.128299                | -3.12204 | 3.156659 |
| H      | 5.940984                | -5.11888 | -1.00642 |
| H      | 4.519453                | -4.86886 | -3.01059 |
| H      | 2.2674                  | -3.85842 | -2.84686 |
| H      | 5.129988                | -4.35632 | 1.219742 |
| H      | 0.339499                | -2.77719 | -2.20761 |
| H      | -1.32126                | -1.69524 | 0.187306 |
| H      | -1.69261                | -1.63754 | -2.85731 |
| H      | 0.022988                | -1.02372 | 1.765942 |

---

|    |          |          |          |
|----|----------|----------|----------|
| H  | -0.69584 | -2.6158  | 2.055529 |
| H  | 0.605483 | -2.02738 | 3.097259 |
| C  | -2.1689  | 1.724726 | 0.729451 |
| C  | -0.8855  | 1.653546 | 0.323739 |
| H  | -2.61453 | 2.684566 | 1.015061 |
| C  | -0.02301 | 2.817436 | 0.364658 |
| H  | -0.49321 | 0.712833 | -0.04819 |
| C  | 1.283927 | 2.918343 | 0.030689 |
| H  | -0.50903 | 3.729732 | 0.710262 |
| C  | 2.04085  | 4.187969 | 0.104176 |
| C  | 2.231932 | 1.891651 | -0.45678 |
| C  | 1.668325 | 5.467874 | 0.490515 |
| C  | 3.357871 | 3.93526  | -0.31813 |
| C  | 3.419595 | 2.512802 | -0.64888 |
| C  | 1.9386   | 0.444396 | -0.67543 |
| C  | 2.623362 | 6.486367 | 0.451158 |
| H  | 0.655506 | 5.685514 | 0.818906 |
| C  | 4.310602 | 4.942492 | -0.35994 |
| Cl | 4.879579 | 1.766534 | -1.21234 |
| H  | 1.600861 | -0.03257 | 0.25092  |
| H  | 1.155476 | 0.30104  | -1.42842 |
| H  | 2.829903 | -0.09012 | -1.01311 |
| C  | 3.928309 | 6.226942 | 0.031046 |
| H  | 2.345615 | 7.492498 | 0.751129 |
| H  | 5.325875 | 4.738493 | -0.68701 |
| H  | 4.655613 | 7.033135 | 0.007613 |

---

**Table S31.** Calculated orientation for transition state **tspq** ( $E = -2310.059144$  Hartree).

| Atomic | Coordinates (Angstroms) |          |          |
|--------|-------------------------|----------|----------|
| Name   | X                       | Y        | Z        |
| C      | -2.75867                | 5.565728 | -1.52815 |
| C      | -2.59959                | 4.379477 | -2.24597 |
| C      | -1.55807                | 3.497846 | -1.94906 |
| C      | -0.68035                | 3.822444 | -0.92302 |
| C      | -0.84908                | 5.018815 | -0.2034  |
| C      | -1.88117                | 5.898866 | -0.49508 |
| C      | 0.482233                | 3.107632 | -0.35632 |
| C      | 0.213552                | 5.049992 | 0.798883 |
| C      | 1.004635                | 3.951359 | 0.738042 |
| C      | 0.887076                | 1.89198  | -0.79767 |
| C      | 1.926955                | 1.035023 | -0.28324 |
| C      | 2.043578                | -0.23702 | -0.74525 |
| Te     | 4.165557                | -1.59168 | -1.15914 |
| C      | 2.182999                | 3.652786 | 1.606894 |
| Pt     | 2.46252                 | -1.62833 | 0.726213 |
| Cl     | 0.385507                | 6.369545 | 1.910534 |
| H      | -3.57586                | 6.237014 | -1.77469 |
| H      | -3.2937                 | 4.137496 | -3.04521 |
| H      | -1.44848                | 2.577628 | -2.51674 |
| H      | -2.0059                 | 6.820239 | 0.066055 |
| H      | 0.324506                | 1.466384 | -1.62862 |
| H      | 2.599096                | 1.399418 | 0.485063 |
| H      | 1.376882                | -0.58521 | -1.52991 |
| H      | 2.027976                | 2.736687 | 2.188925 |

---

|    |          |          |          |
|----|----------|----------|----------|
| H  | 3.093787 | 3.522589 | 1.011335 |
| H  | 2.360421 | 4.468147 | 2.3128   |
| C  | 0.848239 | -2.66641 | 0.434685 |
| C  | -0.34573 | -2.05409 | 0.328073 |
| H  | 0.971872 | -3.75079 | 0.424289 |
| C  | -1.60289 | -2.77376 | 0.331377 |
| H  | -0.37336 | -0.97324 | 0.250952 |
| C  | -2.84539 | -2.25178 | 0.216975 |
| H  | -1.52297 | -3.8546  | 0.439089 |
| C  | -4.0735  | -3.07896 | 0.240409 |
| C  | -3.2877  | -0.84623 | 0.042546 |
| C  | -4.26448 | -4.4464  | 0.374808 |
| C  | -5.17863 | -2.22367 | 0.095747 |
| C  | -4.63979 | -0.86899 | -0.02344 |
| C  | -2.42249 | 0.369064 | -0.06346 |
| C  | -5.56935 | -4.94576 | 0.362365 |
| H  | -3.4244  | -5.12635 | 0.486702 |
| C  | -6.47598 | -2.71204 | 0.083518 |
| Cl | -5.67113 | 0.506838 | -0.2319  |
| H  | -1.83526 | 0.531841 | 0.847423 |
| H  | -1.72308 | 0.285845 | -0.90304 |
| H  | -3.02821 | 1.263692 | -0.22724 |
| C  | -6.66094 | -4.08959 | 0.219106 |
| H  | -5.73438 | -6.01404 | 0.465625 |
| H  | -7.32482 | -2.04407 | -0.02801 |
| H  | -7.66705 | -4.49803 | 0.212516 |

---

**Table S32.** Calculated orientation for transition state **q** ( $E = -2310.067075$  Hartree).

| Atomic | Coordinates (Angstroms) |          |          |
|--------|-------------------------|----------|----------|
| Name   | X                       | Y        | Z        |
| C      | 5.375555                | -4.76637 | 1.913422 |
| C      | 4.30895                 | -4.22501 | 2.630628 |
| C      | 3.63221                 | -3.09508 | 2.16436  |
| C      | 4.041573                | -2.51915 | 0.970451 |
| C      | 5.11703                 | -3.07118 | 0.254395 |
| C      | 5.793114                | -4.19189 | 0.711087 |
| C      | 3.545344                | -1.34312 | 0.21906  |
| C      | 5.288777                | -2.24184 | -0.93814 |
| C      | 4.3927                  | -1.22846 | -0.99101 |
| C      | 2.505339                | -0.5876  | 0.637847 |
| C      | 1.92098                 | 0.575021 | -0.00278 |
| C      | 0.81712                 | 1.157881 | 0.497546 |
| Te     | 0.23924                 | 4.664101 | 0.910622 |
| C      | 4.283473                | -0.19928 | -2.06916 |
| Pt     | -0.06572                | 2.594707 | -0.48964 |
| Cl     | 6.51867                 | -2.57619 | -2.11141 |
| H      | 5.887918                | -5.64493 | 2.293882 |
| H      | 3.999534                | -4.68633 | 3.563638 |
| H      | 2.80391                 | -2.68509 | 2.735536 |
| H      | 6.623334                | -4.61202 | 0.151271 |
| H      | 2.025256                | -0.881   | 1.570749 |
| H      | 2.376081                | 0.962118 | -0.90835 |
| H      | 0.351683                | 0.833068 | 1.425882 |

---

|    |          |          |          |
|----|----------|----------|----------|
| H  | 3.29868  | -0.22657 | -2.5501  |
| H  | 4.441186 | 0.81145  | -1.67529 |
| H  | 5.034301 | -0.37219 | -2.84416 |
| C  | -1.87281 | 1.858635 | -0.3077  |
| C  | -2.14427 | 0.546084 | -0.20878 |
| H  | -2.66204 | 2.609858 | -0.3613  |
| C  | -3.50396 | 0.043663 | -0.23846 |
| H  | -1.33441 | -0.16683 | -0.12115 |
| C  | -3.90906 | -1.24432 | -0.16948 |
| H  | -4.27733 | 0.805453 | -0.32761 |
| C  | -5.33283 | -1.64942 | -0.20812 |
| C  | -3.11966 | -2.49323 | -0.04255 |
| C  | -6.50307 | -0.91168 | -0.31823 |
| C  | -5.39032 | -3.05004 | -0.11022 |
| C  | -4.00758 | -3.51478 | -0.01073 |
| C  | -1.63153 | -2.6165  | 0.039251 |
| C  | -7.72477 | -1.58907 | -0.32819 |
| H  | -6.48402 | 0.171943 | -0.39552 |
| C  | -6.59957 | -3.7286  | -0.11965 |
| Cl | -3.62048 | -5.19817 | 0.130544 |
| H  | -1.14356 | -2.20942 | -0.85384 |
| H  | -1.23202 | -2.08796 | 0.912858 |
| H  | -1.33677 | -3.6653  | 0.126025 |
| C  | -7.77257 | -2.97973 | -0.23008 |
| H  | -8.64844 | -1.02452 | -0.41323 |
| H  | -6.63463 | -4.81125 | -0.04357 |
| H  | -8.73289 | -3.48653 | -0.23976 |

---

**Table S33.** Calculated orientation for intermediate **r** ( $E = -2310.042144$  Hartree).

| Atomic | Coordinates (Angstroms) |          |          |
|--------|-------------------------|----------|----------|
| Name   | X                       | Y        | Z        |
| C      | -1.8104                 | 7.016347 | -3.26147 |
| C      | -1.49097                | 5.884786 | -2.50847 |
| C      | -0.6452                 | 6.025213 | -1.41613 |
| C      | -0.12656                | 7.290298 | -1.08767 |
| C      | -0.44018                | 8.418409 | -1.83257 |
| C      | -1.29168                | 8.268369 | -2.92767 |
| C      | -0.1246                 | 5.046119 | -0.43644 |
| C      | 0.737483                | 5.806042 | 0.496848 |
| C      | 0.71342                 | 7.098182 | 0.091408 |
| C      | -0.43666                | 3.730195 | -0.4694  |
| C      | 0                       | 2.664602 | 0.411532 |
| C      | -0.43318                | 1.398524 | 0.24138  |
| Cl     | 1.556219                | 8.417958 | 0.838911 |
| C      | 1.490509                | 5.260058 | 1.666668 |
| C      | -1.49051                | -5.26006 | 1.666668 |
| Cl     | -1.55622                | -8.41796 | 0.838911 |
| C      | 0.433181                | -1.39852 | 0.24138  |
| C      | 0                       | -2.6646  | 0.411532 |
| C      | 0.436663                | -3.7302  | -0.4694  |
| C      | -0.71342                | -7.09818 | 0.091408 |
| C      | -0.73748                | -5.80604 | 0.496848 |
| C      | 0.124601                | -5.04612 | -0.43644 |
| C      | 1.291675                | -8.26837 | -2.92767 |



---

|    |          |          |          |
|----|----------|----------|----------|
| C  | 0.44018  | -8.41841 | -1.83257 |
| C  | 0.126562 | -7.2903  | -1.08767 |
| C  | 0.645197 | -6.02521 | -1.41613 |
| C  | 1.49097  | -5.88479 | -2.50847 |
| C  | 1.810404 | -7.01635 | -3.26147 |
| H  | -2.47129 | 6.919907 | -4.11784 |
| H  | -1.90297 | 4.917564 | -2.78323 |
| H  | -0.03472 | 9.391361 | -1.57102 |
| H  | -1.5531  | 9.135644 | -3.52676 |
| H  | -1.10925 | 3.408754 | -1.26467 |
| H  | 0.685676 | 2.900559 | 1.218409 |
| H  | -1.08789 | 1.143269 | -0.59357 |
| H  | 2.219129 | 4.502898 | 1.354958 |
| H  | 2.037295 | 6.055797 | 2.17905  |
| H  | 0.81425  | 4.798441 | 2.395506 |
| H  | -2.21913 | -4.5029  | 1.354958 |
| H  | -2.0373  | -6.0558  | 2.17905  |
| H  | -0.81425 | -4.79844 | 2.395506 |
| H  | 1.087886 | -1.14327 | -0.59357 |
| H  | -0.68568 | -2.90056 | 1.218409 |
| H  | 1.109246 | -3.40875 | -1.26467 |
| H  | 1.553096 | -9.13564 | -3.52676 |
| H  | 0.034721 | -9.39136 | -1.57102 |
| H  | 1.902973 | -4.91756 | -2.78323 |
| H  | 2.471293 | -6.91991 | -4.11784 |
| Pt | 0        | 0        | 1.503578 |

---

**Table S34.** Calculated orientation for transition state **tsrs** ( $E = -2310.00932$  Hartree).

| Atomic | Coordinates (Angstroms) |          |          |
|--------|-------------------------|----------|----------|
| Name   | X                       | Y        | Z        |
| C      | -1.54794                | 5.672798 | -3.10607 |
| C      | -1.24579                | 4.698595 | -2.1527  |
| C      | 0.041669                | 4.64644  | -1.63387 |
| C      | 1.013562                | 5.56464  | -2.0725  |
| C      | 0.718735                | 6.534205 | -3.02036 |
| C      | -0.57768                | 6.579903 | -3.53494 |
| C      | 0.669232                | 3.75479  | -0.63748 |
| C      | 2.072246                | 4.196141 | -0.50259 |
| C      | 2.238933                | 5.244128 | -1.34651 |
| C      | 0                       | 2.750547 | -0.01444 |
| C      | 0.478078                | 1.808222 | 0.957576 |
| C      | -0.34985                | 0.858767 | 1.489648 |
| Cl     | 3.705078                | 6.141328 | -1.58161 |
| C      | 3.111222                | 3.609088 | 0.396911 |
| C      | -3.11122                | -3.60909 | 0.396911 |
| Cl     | -3.70508                | -6.14133 | -1.58161 |
| C      | 0.349845                | -0.85877 | 1.489648 |
| C      | -0.47808                | -1.80822 | 0.957576 |
| C      | 0                       | -2.75055 | -0.01444 |
| C      | -2.23893                | -5.24413 | -1.34651 |
| C      | -2.07225                | -4.19614 | -0.50259 |
| C      | -0.66923                | -3.75479 | -0.63748 |
| C      | 0.577677                | -6.5799  | -3.53494 |

---

|    |          |          |          |
|----|----------|----------|----------|
| C  | -0.71874 | -6.53421 | -3.02036 |
| C  | -1.01356 | -5.56464 | -2.0725  |
| C  | -0.04167 | -4.64644 | -1.63387 |
| C  | 1.245789 | -4.6986  | -2.1527  |
| C  | 1.547939 | -5.6728  | -3.10607 |
| H  | -2.55115 | 5.72437  | -3.51877 |
| H  | -2.01328 | 3.999543 | -1.83119 |
| H  | 1.475135 | 7.238601 | -3.35376 |
| H  | -0.83363 | 7.329555 | -4.27781 |
| H  | -1.0507  | 2.632943 | -0.2799  |
| H  | 1.522571 | 1.818716 | 1.245684 |
| H  | -1.38873 | 0.840488 | 1.156689 |
| H  | 3.311246 | 2.560795 | 0.146254 |
| H  | 4.053188 | 4.156451 | 0.308443 |
| H  | 2.798271 | 3.649964 | 1.446484 |
| H  | -3.31125 | -2.5608  | 0.146254 |
| H  | -4.05319 | -4.15645 | 0.308443 |
| H  | -2.79827 | -3.64996 | 1.446484 |
| H  | 1.388732 | -0.84049 | 1.156689 |
| H  | -1.52257 | -1.81872 | 1.245684 |
| H  | 1.050698 | -2.63294 | -0.2799  |
| H  | 0.833632 | -7.32956 | -4.27781 |
| H  | -1.47514 | -7.2386  | -3.35376 |
| H  | 2.013279 | -3.99954 | -1.83119 |
| H  | 2.551154 | -5.72437 | -3.51877 |
| Pt | 0        | 0        | 3.254082 |

---

**Table S35.** Calculated orientation for intermediate **s** ( $E = -2310.044013$  Hartree).

| Atomic | Coordinates (Angstroms) |          |          |
|--------|-------------------------|----------|----------|
| Name   | X                       | Y        | Z        |
| C      | -2.1817                 | 7.194768 | -0.8237  |
| C      | -1.74762                | 5.870719 | -0.89941 |
| C      | -0.43752                | 5.57366  | -0.54376 |
| C      | 0.427031                | 6.601816 | -0.12233 |
| C      | 0                       | 7.921027 | -0.04845 |
| C      | -1.31785                | 8.208506 | -0.4034  |
| C      | 0.314959                | 4.305248 | -0.52017 |
| C      | 1.675375                | 4.630597 | -0.04977 |
| C      | 1.707508                | 5.968232 | 0.172032 |
| C      | -0.22632                | 3.107489 | -0.85589 |
| C      | 0.407464                | 1.815232 | -0.91174 |
| C      | -0.32205                | 0.658934 | -1.23702 |
| Cl     | 3.071161                | 6.873409 | 0.750498 |
| C      | 2.788685                | 3.661748 | 0.184293 |
| C      | -2.78869                | -3.66175 | 0.184293 |
| Cl     | -3.07116                | -6.87341 | 0.750498 |
| C      | 0.322052                | -0.65893 | -1.23702 |
| C      | -0.40746                | -1.81523 | -0.91174 |
| C      | 0.226317                | -3.10749 | -0.85589 |
| C      | -1.70751                | -5.96823 | 0.172032 |
| C      | -1.67538                | -4.6306  | -0.04977 |
| C      | -0.31496                | -4.30525 | -0.52017 |
| C      | 1.317847                | -8.20851 | -0.4034  |

---

|    |          |          |          |
|----|----------|----------|----------|
| C  | 0        | -7.92103 | -0.04845 |
| C  | -0.42703 | -6.60182 | -0.12233 |
| C  | 0.437521 | -5.57366 | -0.54376 |
| C  | 1.747622 | -5.87072 | -0.89941 |
| C  | 2.181699 | -7.19477 | -0.8237  |
| H  | -3.20413 | 7.439506 | -1.09627 |
| H  | -2.43071 | 5.093673 | -1.23272 |
| H  | 0.673382 | 8.708479 | 0.277264 |
| H  | -1.6757  | 9.232663 | -0.35307 |
| H  | -1.28629 | 3.106962 | -1.11132 |
| H  | 1.489831 | 1.752363 | -0.8926  |
| H  | -1.37857 | 0.740791 | -1.49419 |
| H  | 3.14012  | 3.216901 | -0.75462 |
| H  | 3.642423 | 4.157578 | 0.653574 |
| H  | 2.468609 | 2.844956 | 0.842221 |
| H  | -3.14012 | -3.2169  | -0.75462 |
| H  | -3.64242 | -4.15758 | 0.653574 |
| H  | -2.46861 | -2.84496 | 0.842221 |
| H  | 1.37857  | -0.74079 | -1.49419 |
| H  | -1.48983 | -1.75236 | -0.8926  |
| H  | 1.286291 | -3.10696 | -1.11132 |
| H  | 1.675696 | -9.23266 | -0.35307 |
| H  | -0.67338 | -8.70848 | 0.277264 |
| H  | 2.430709 | -5.09367 | -1.23272 |
| H  | 3.204129 | -7.43951 | -1.09627 |
| Pt | 0        | 0        | 0.737413 |

---

**Table S36.** Calculated orientation for intermediate **t** ( $E = -1922.829753$  Hartree).

| Atomic | Coordinates (Angstroms) |          |          |
|--------|-------------------------|----------|----------|
| Name   | X                       | Y        | Z        |
| C      | 4.342079                | 0.119685 | -5.2E-05 |
| C      | 3.057888                | 0.549326 | -0.00018 |
| C      | 1.838482                | -0.22094 | -0.00017 |
| C      | 0.620781                | 0.366865 | -0.00021 |
| C      | -0.62078                | -0.36686 | -0.0002  |
| C      | -1.83848                | 0.22094  | -0.00019 |
| C      | -3.05789                | -0.54932 | -0.00018 |
| C      | -4.34208                | -0.11968 | -0.00007 |
| C      | -4.89434                | 1.252861 | 0.00008  |
| C      | -6.24316                | 1.134049 | 0.000111 |
| C      | -6.67374                | -0.26194 | -4E-06   |
| C      | -5.50174                | -1.03826 | -0.00011 |
| C      | -7.93086                | -0.84739 | -1.2E-05 |
| C      | -8.00782                | -2.24076 | -0.00013 |
| C      | -6.8501                 | -3.01901 | -0.00024 |
| C      | -5.58716                | -2.42358 | -0.00023 |
| Cl     | -7.38288                | 2.442058 | 0.000274 |
| C      | 4.894335                | -1.25286 | 0.000139 |
| C      | 6.243161                | -1.13405 | 0.000184 |
| C      | 6.673737                | 0.261934 | 0.000038 |
| C      | 5.50174                 | 1.038264 | -0.00011 |
| C      | 7.930856                | 0.847385 | 0.00003  |
| C      | 8.007818                | 2.240754 | -0.00013 |

---

|    |          |          |          |
|----|----------|----------|----------|
| C  | 6.850103 | 3.019005 | -0.00027 |
| C  | 5.587163 | 2.423583 | -0.00026 |
| Cl | 7.382883 | -2.44206 | 0.000395 |
| C  | -4.11688 | 2.528706 | 0.000203 |
| C  | 4.116876 | -2.52871 | 0.000282 |
| H  | 2.908662 | 1.629095 | -0.00031 |
| H  | 1.891426 | -1.30473 | -0.00014 |
| H  | 0.555093 | 1.455141 | -0.00025 |
| H  | -0.55509 | -1.45514 | -0.00021 |
| H  | -1.89143 | 1.304727 | -0.00019 |
| H  | -2.90866 | -1.62909 | -0.00027 |
| H  | -8.83088 | -0.23975 | 0.00007  |
| H  | -8.98029 | -2.72396 | -0.00014 |
| H  | -6.93084 | -4.10192 | -0.00034 |
| H  | -4.69532 | -3.04449 | -0.00032 |
| H  | 8.830879 | 0.239743 | 0.00014  |
| H  | 8.98029  | 2.723956 | -0.00014 |
| H  | 6.930846 | 4.101917 | -0.00039 |
| H  | 4.69532  | 3.044489 | -0.00038 |
| H  | -4.78836 | 3.390883 | 0.000377 |
| H  | -3.47660 | 2.604645 | 0.886328 |
| H  | -3.47673 | 2.604905 | -0.886   |
| H  | 4.788356 | -3.39088 | 0.000466 |
| H  | 3.4766   | -2.60463 | 0.886409 |
| H  | 3.47673  | -2.60492 | -0.88592 |

---

**Table S37.** Calculated orientation for intermediate **u** ( $E = -4334.072777$  Hartree).

| Atomic<br>Name | Coordinates (Angstroms) |          |          |
|----------------|-------------------------|----------|----------|
|                | X                       | Y        | Z        |
| C              | 5.384791                | -0.7178  | -0.27325 |
| C              | 2.639536                | -0.56839 | -1.36587 |
| C              | 2.465566                | 0.550185 | -1.8588  |
| C              | 2.550152                | 1.842539 | -2.5373  |
| Te             | 5.025695                | 1.127841 | 0.640677 |
| C              | 6.993344                | 1.431307 | 0.11324  |
| C              | 7.521776                | 0.364752 | -0.53513 |
| C              | 6.669073                | -0.77562 | -0.72709 |
| H              | 3.544999                | 1.944369 | -2.98266 |
| H              | 1.794239                | 1.911421 | -3.32504 |
| H              | 2.396909                | 2.65771  | -1.82298 |
| H              | 7.517168                | 2.356987 | 0.322171 |
| H              | 8.545838                | 0.363875 | -0.89846 |
| H              | 7.033954                | -1.66764 | -1.23075 |
| C              | 2.833521                | -4.1717  | -0.42569 |
| C              | 2.3554                  | -2.96029 | -0.90228 |
| C              | 3.154743                | -1.81076 | -0.85201 |
| C              | 4.461852                | -1.86739 | -0.3198  |
| C              | 4.91485                 | -3.10379 | 0.158296 |
| C              | 4.118056                | -4.24118 | 0.106572 |
| H              | 2.204419                | -5.05504 | -0.4671  |
| H              | 1.358175                | -2.88934 | -1.32459 |
| H              | 5.908863                | -3.15797 | 0.590834 |
| H              | 4.500836                | -5.18205 | 0.490367 |
| Pt             | 0.516383                | 0.001476 | -0.85196 |
| Cl             | -0.21413                | -0.77437 | -2.9589  |
| Cl             | 1.28299                 | 0.894723 | 1.215975 |
| P              | -1.59937                | 0.112916 | 0.051368 |
| C              | -1.88812                | 1.881608 | 0.394484 |



---

|   |          |          |          |
|---|----------|----------|----------|
| C | -1.88363 | -0.83145 | 1.582852 |
| C | -2.97685 | -0.52131 | -0.9681  |
| C | -1.88875 | 2.739373 | -0.70643 |
| C | -1.8915  | 2.471537 | 1.656065 |
| C | -3.08362 | -0.67232 | 2.278604 |
| C | -1.00898 | -1.81898 | 2.035211 |
| C | -2.87569 | -1.86166 | -1.3469  |
| C | -4.09938 | 0.177246 | -1.40475 |
| C | -1.93146 | 4.11537  | -0.57668 |
| F | -1.84369 | 2.224549 | -1.93494 |
| C | -1.9361  | 3.851103 | 1.811146 |
| F | -1.83299 | 1.746742 | 2.768585 |
| C | -3.39126 | -1.41509 | 3.403255 |
| F | -3.97136 | 0.232059 | 1.86175  |
| C | -1.29894 | -2.57818 | 3.162978 |
| F | 0.114583 | -2.10548 | 1.395361 |
| C | -3.81623 | -2.4778  | -2.15373 |
| F | -1.85594 | -2.59591 | -0.90213 |
| C | -5.05439 | -0.41901 | -2.2178  |
| F | -4.31844 | 1.440373 | -1.04801 |
| C | -1.95632 | 4.673686 | 0.695362 |
| F | -1.94207 | 4.896338 | -1.65065 |
| F | -1.94845 | 4.382721 | 3.028203 |
| C | -2.48658 | -2.37296 | 3.847969 |
| F | -4.53517 | -1.22552 | 4.05075  |
| F | -0.44969 | -3.51212 | 3.573284 |
| C | -4.90954 | -1.74536 | -2.59749 |
| F | -3.6828  | -3.75352 | -2.49528 |
| F | -6.11379 | 0.274488 | -2.61986 |
| F | -1.99821 | 5.988922 | 0.84088  |
| F | -2.76756 | -3.09697 | 4.919107 |
| F | -5.82238 | -2.31788 | -3.36661 |

---

**Table S38.** Calculated orientation for transition state **tsuv** ( $E = -4334.044223$  Hartree).

| Atomic | Coordinates (Angstroms) |          |          |
|--------|-------------------------|----------|----------|
| Name   | X                       | Y        | Z        |
| C      | -4.6512                 | 1.439004 | -0.0204  |
| C      | -5.43694                | 2.548777 | 0.276539 |
| C      | -4.8235                 | 3.729038 | 0.691531 |
| C      | -3.43629                | 3.798581 | 0.81031  |
| C      | -2.64609                | 2.692201 | 0.514646 |
| C      | -3.25258                | 1.510172 | 0.095537 |
| C      | -2.56715                | 0.265396 | -0.23506 |
| C      | -3.21404                | -0.77888 | -0.6504  |
| C      | -5.18694                | 0.145083 | -0.4845  |
| Te     | -6.36361                | -1.12623 | 0.682024 |
| C      | -6.66733                | -2.00738 | -1.14693 |
| C      | -6.03029                | -1.36864 | -2.16812 |
| C      | -5.26848                | -0.2131  | -1.82506 |
| C      | -3.16052                | -2.17234 | -1.09484 |
| Cl     | -0.35521                | 0.400818 | -2.42879 |
| Cl     | -0.84962                | -0.39003 | 2.234624 |
| H      | -6.51766                | 2.49252  | 0.184828 |
| H      | -5.43276                | 4.596006 | 0.928168 |
| H      | -2.96715                | 4.719225 | 1.143441 |
| H      | -1.56728                | 2.733809 | 0.62272  |
| H      | -7.25989                | -2.9079  | -1.26435 |
| H      | -6.08949                | -1.72039 | -3.1929  |
| H      | -4.78245                | 0.398749 | -2.58049 |
| H      | -2.29718                | -2.62864 | -0.59773 |
| H      | -3.03098                | -2.25271 | -2.17866 |
| H      | -4.04825                | -2.73635 | -0.7921  |
| P      | 1.780032                | -0.04614 | -0.00788 |
| Pt     | -0.54267                | -0.02351 | -0.08372 |

---

|   |          |          |          |
|---|----------|----------|----------|
| C | 2.698165 | -1.26027 | -1.01898 |
| C | 4.086799 | -1.18274 | -1.13357 |
| C | 2.07172  | -2.35809 | -1.60644 |
| C | 4.827179 | -2.11958 | -1.83113 |
| C | 2.79575  | -3.31277 | -2.31193 |
| C | 4.171526 | -3.19134 | -2.42634 |
| C | 2.27635  | 1.622914 | -0.57478 |
| C | 2.833253 | 1.927515 | -1.81334 |
| C | 1.833397 | 2.699241 | 0.194947 |
| C | 2.975478 | 3.239953 | -2.24699 |
| C | 1.959415 | 4.013481 | -0.21568 |
| C | 2.537612 | 4.284631 | -1.44897 |
| C | 2.584149 | -0.34982 | 1.610872 |
| C | 3.436374 | 0.496239 | 2.314776 |
| C | 2.276482 | -1.57419 | 2.206611 |
| C | 3.922449 | 0.159981 | 3.571454 |
| C | 2.752958 | -1.93441 | 3.455701 |
| C | 3.575662 | -1.05419 | 4.145126 |
| F | 3.84139  | 1.659812 | 1.809152 |
| F | 4.733285 | 0.9923   | 4.218314 |
| F | 4.045608 | -1.38183 | 5.340459 |
| F | 2.437163 | -3.10999 | 3.988154 |
| F | 1.525185 | -2.45629 | 1.548423 |
| F | 4.740673 | -0.16637 | -0.56814 |
| F | 6.147466 | -2.00518 | -1.93362 |
| F | 4.865055 | -4.10091 | -3.09432 |
| F | 2.17358  | -4.34993 | -2.86308 |
| F | 0.766428 | -2.56183 | -1.49499 |
| F | 3.238125 | 0.977676 | -2.65301 |
| F | 3.520751 | 3.493338 | -3.43276 |
| F | 2.669214 | 5.537936 | -1.86025 |
| F | 1.527346 | 5.007308 | 0.554527 |
| F | 1.254351 | 2.469005 | 1.374893 |

---

**Table S39.** Calculated orientation for intermediate **v** ( $E = -4334.067896$  Hartree).

| Atomic<br>Name | Coordinates (Angstroms) |          |          |
|----------------|-------------------------|----------|----------|
|                | X                       | Y        | Z        |
| C              | 3.424113                | -4.34649 | -0.5657  |
| C              | 4.812612                | -4.15257 | -0.58576 |
| C              | 5.384293                | -2.88769 | -0.44461 |
| C              | 4.536376                | -1.81031 | -0.24657 |
| C              | 3.134083                | -1.99377 | -0.2282  |
| C              | 2.571345                | -3.26843 | -0.3956  |
| C              | 2.470835                | -0.73442 | -0.06923 |
| C              | 4.823258                | -0.3598  | -0.13411 |
| C              | 4.304272                | 0.422417 | -1.32402 |
| C              | 5.045643                | 1.664737 | -1.60794 |
| C              | 6.146913                | 1.930987 | -0.89447 |
| Te             | 6.622983                | 0.513435 | 0.580159 |
| C              | 3.475934                | 0.321892 | 0.026523 |
| C              | 3.175253                | 1.571134 | 0.815766 |
| H              | 3.021285                | -5.34715 | -0.68128 |
| H              | 5.462943                | -5.01326 | -0.71287 |
| H              | 6.461673                | -2.75727 | -0.4738  |
| H              | 1.493144                | -3.39237 | -0.37941 |
| H              | 3.885906                | -0.11922 | -2.16793 |
| H              | 4.710319                | 2.315573 | -2.41054 |
| H              | 6.761224                | 2.81452  | -1.0331  |
| H              | 2.308058                | 2.081482 | 0.386036 |
| H              | 2.942567                | 1.310254 | 1.852341 |
| H              | 4.019652                | 2.263311 | 0.811882 |
| Pt             | 0.54458                 | -0.44235 | -0.00299 |
| Cl             | 0.566385                | -1.19462 | 2.248537 |
| Cl             | 0.585516                | 0.383635 | -2.24793 |
| P              | 1.79865                 | 0.098406 | 0.001607 |
| C              | 2.895098                | -0.68632 | -1.22922 |

---

|   |          |          |          |
|---|----------|----------|----------|
| C | 2.49155  | -1.79986 | -1.96366 |
| C | 4.21485  | -0.26164 | -1.38666 |
| C | 3.356116 | -2.4376  | -2.84613 |
| C | 5.092036 | -0.8789  | -2.25967 |
| C | 4.653723 | -1.97388 | -2.99615 |
| C | 1.852209 | 1.904202 | -0.28889 |
| C | 2.227247 | 2.527297 | -1.47528 |
| C | 1.237634 | 2.704602 | 0.6747   |
| C | 2.033445 | 3.888293 | -1.67692 |
| C | 1.032157 | 4.060795 | 0.497875 |
| C | 1.435492 | 4.656359 | -0.69036 |
| C | 2.757981 | -0.25397 | 1.522119 |
| C | 3.456324 | 0.644463 | 2.323711 |
| C | 2.760043 | -1.59134 | 1.921287 |
| C | 4.088331 | 0.238295 | 3.491773 |
| C | 3.387439 | -2.02195 | 3.077995 |
| C | 4.049146 | -1.09517 | 3.872144 |
| F | 2.16893  | -2.50637 | 1.152935 |
| F | 3.366582 | -3.30461 | 3.422981 |
| F | 4.658765 | -1.48645 | 4.982012 |
| F | 4.744187 | 1.122082 | 4.237935 |
| F | 3.564931 | 1.931486 | 1.999671 |
| F | 2.771788 | 1.847667 | -2.48177 |
| F | 2.411912 | 4.452271 | -2.81977 |
| F | 1.248082 | 5.955049 | -0.87935 |
| F | 0.450615 | 4.787679 | 1.446605 |
| F | 0.823318 | 2.151935 | 1.81541  |
| F | 1.278737 | -2.31988 | -1.83058 |
| F | 2.946913 | -3.49842 | -3.53375 |
| F | 5.48227  | -2.57961 | -3.83323 |
| F | 6.338782 | -0.43943 | -2.39699 |
| F | 4.660452 | 0.783381 | -0.68756 |

---

**Table S40.** Calculated orientation for transition state **tsvw** ( $E = -4334.049644$  Hartree).

| Atomic<br>Name | Coordinates (Angstroms) |          |          |
|----------------|-------------------------|----------|----------|
|                | X                       | Y        | Z        |
| C              | 3.686453                | -4.21765 | -0.76522 |
| C              | 5.045423                | -3.99187 | -1.01369 |
| C              | 5.55833                 | -2.69679 | -1.04193 |
| C              | 4.674233                | -1.6417  | -0.85951 |
| C              | 3.306143                | -1.85705 | -0.61317 |
| C              | 2.808247                | -3.15908 | -0.5565  |
| C              | 2.610836                | -0.57768 | -0.49103 |
| C              | 4.938493                | -0.18662 | -0.77867 |
| C              | 5.986825                | 0.486807 | -1.52648 |
| C              | 6.651199                | 1.539426 | -0.95451 |
| C              | 6.428955                | 1.794331 | 0.417074 |
| Te             | 5.17947                 | 0.539331 | 1.321306 |
| C              | 3.51046                 | 0.442474 | -0.64778 |
| C              | 3.201523                | 1.8748   | -0.95585 |
| H              | 3.312524                | -5.23683 | -0.73954 |
| H              | 5.706648                | -4.83559 | -1.18688 |
| H              | 6.616793                | -2.52079 | -1.21437 |
| H              | 1.753549                | -3.33114 | -0.36516 |
| H              | 6.23408                 | 0.121418 | -2.5193  |
| H              | 7.356377                | 2.145164 | -1.51509 |
| H              | 6.852779                | 2.655584 | 0.92387  |
| H              | 2.296769                | 2.184563 | -0.42564 |
| H              | 4.011228                | 2.563827 | -0.69202 |
| H              | 3.017786                | 1.980224 | -2.03235 |
| Pt             | 0.647625                | -0.36211 | -0.22529 |
| Cl             | 1.119538                | -0.15713 | 2.102964 |
| Cl             | 0.314315                | -0.50897 | -2.58588 |
| P              | 1.680225                | 0.052408 | -0.01503 |

---

|   |          |          |          |
|---|----------|----------|----------|
| C | 2.894238 | -1.18294 | -0.60277 |
| C | 2.513704 | -2.48768 | -0.9109  |
| C | 4.256896 | -0.88791 | -0.655   |
| C | 3.448386 | -3.44513 | -1.29023 |
| C | 5.20427  | -1.82284 | -1.03049 |
| C | 4.791707 | -3.11072 | -1.35309 |
| C | 1.963632 | 1.581148 | -0.98636 |
| C | 2.582135 | 1.651335 | -2.23074 |
| C | 1.282694 | 2.722591 | -0.56186 |
| C | 2.557042 | 2.810899 | -2.99634 |
| C | 1.240292 | 3.887717 | -1.30538 |
| C | 1.885488 | 3.93109  | -2.5343  |
| C | 2.359182 | 0.337727 | 1.666251 |
| C | 2.993581 | 1.474814 | 2.157346 |
| C | 2.176535 | -0.71785 | 2.560962 |
| C | 3.384902 | 1.575636 | 3.48613  |
| C | 2.563085 | -0.64421 | 3.88875  |
| C | 3.16451  | 0.516793 | 4.354248 |
| F | 1.642653 | -1.86028 | 2.130401 |
| F | 2.371063 | -1.67221 | 4.709071 |
| F | 3.544706 | 0.606807 | 5.621805 |
| F | 3.985911 | 2.679031 | 3.9242   |
| F | 3.270962 | 2.515238 | 1.37257  |
| F | 3.213781 | 0.605526 | -2.75986 |
| F | 3.168511 | 2.842723 | -4.17702 |
| F | 1.857732 | 5.040257 | -3.26155 |
| F | 0.585127 | 4.954808 | -0.85558 |
| F | 0.636854 | 2.706608 | 0.605777 |
| F | 1.251639 | -2.8844  | -0.82725 |
| F | 3.059054 | -4.68298 | -1.57852 |
| F | 5.686906 | -4.02008 | -1.71083 |
| F | 6.494049 | -1.50308 | -1.08312 |
| F | 4.680711 | 0.339956 | -0.34874 |

---

**Table S41.** Calculated orientation for intermediate **w** ( $E = -4334.08287$  Hartree).

| Atomic<br>Name | Coordinates (Angstroms) |          |          |
|----------------|-------------------------|----------|----------|
|                | X                       | Y        | Z        |
| C              | -3.41162                | 4.667258 | 0.188264 |
| C              | -4.80551                | 4.586855 | -0.01879 |
| C              | -5.45063                | 3.381452 | -0.24523 |
| C              | -4.67948                | 2.216863 | -0.27771 |
| C              | -3.27655                | 2.290015 | -0.07031 |
| C              | -2.63911                | 3.52761  | 0.165016 |
| C              | -2.68976                | 1.004139 | -0.16686 |
| C              | -5.05479                | 0.828575 | -0.46128 |
| C              | -6.30265                | 0.321155 | -0.57331 |
| C              | -6.61216                | -1.0889  | -0.46651 |
| C              | -5.8351                 | -1.97836 | 0.187243 |
| Te             | -3.99268                | -1.51793 | 1.063315 |
| C              | -3.7681                 | 0.024471 | -0.47585 |
| C              | -3.50644                | -0.66204 | -1.83052 |
| H              | -2.9548                 | 5.635276 | 0.364644 |
| H              | -5.3898                 | 5.502432 | 0.000498 |
| H              | -6.52483                | 3.350461 | -0.39738 |
| H              | -1.56544                | 3.561838 | 0.319527 |
| H              | -7.14234                | 1.006443 | -0.66965 |
| H              | -7.57607                | -1.42031 | -0.8469  |
| H              | -6.17006                | -3.00616 | 0.303258 |
| H              | -2.56211                | -1.21083 | -1.80955 |
| H              | -4.3197                 | -1.35444 | -2.06385 |
| H              | -3.44978                | 0.094439 | -2.62034 |
| Pt             | -0.77503                | 0.602813 | -0.03397 |
| Cl             | -1.09812                | 0.048237 | 2.253482 |
| Cl             | -0.46903                | 1.191845 | -2.3273  |
| P              | 1.534083                | -0.04678 | -0.05305 |
| C              | 2.812929                | 1.16524  | -0.52815 |



---

|   |          |          |          |
|---|----------|----------|----------|
| C | 2.546497 | 2.532924 | -0.55385 |
| C | 4.128462 | 0.766065 | -0.76605 |
| C | 3.540792 | 3.459355 | -0.84642 |
| C | 5.13369  | 1.669235 | -1.06069 |
| C | 4.83213  | 3.025979 | -1.10372 |
| C | 1.577442 | -1.41035 | -1.27252 |
| C | 2.089365 | -1.32776 | -2.56393 |
| C | 0.814067 | -2.53867 | -0.96902 |
| C | 1.88063  | -2.3363  | -3.49659 |
| C | 0.591304 | -3.55546 | -1.87976 |
| C | 1.130861 | -3.45077 | -3.15547 |
| C | 2.271813 | -0.66333 | 1.505972 |
| C | 2.833173 | -1.91259 | 1.75376  |
| C | 2.2448   | 0.240541 | 2.569016 |
| C | 3.30304  | -2.2619  | 3.01315  |
| C | 2.712576 | -0.08155 | 3.831712 |
| C | 3.238104 | -1.34721 | 4.054118 |
| F | 1.783673 | 1.474858 | 2.368019 |
| F | 2.669915 | 0.807436 | 4.817665 |
| F | 3.694686 | -1.6749  | 5.254373 |
| F | 3.830331 | -3.46495 | 3.219088 |
| F | 2.960471 | -2.8243  | 0.791706 |
| F | 2.785778 | -0.27067 | -2.97452 |
| F | 2.391203 | -2.22836 | -4.71919 |
| F | 0.928892 | -4.41449 | -4.04289 |
| F | -0.13467 | -4.6174  | -1.54575 |
| F | 0.267663 | -2.65294 | 0.242128 |
| F | 1.343961 | 3.013549 | -0.26706 |
| F | 3.260428 | 4.758074 | -0.86422 |
| F | 5.784053 | 3.904317 | -1.37993 |
| F | 6.373814 | 1.254371 | -1.29767 |
| F | 4.443992 | -0.52919 | -0.72246 |

---

**Table S42.** Calculated orientation for transition state **tswx** ( $E = -4334.050852$  Hartree).

| Atomic<br>Name | Coordinates (Angstroms) |          |          |
|----------------|-------------------------|----------|----------|
|                | X                       | Y        | Z        |
| Cl             | 1.246508                | -0.51027 | 2.05761  |
| Cl             | 0.312074                | -0.68777 | -2.60879 |
| C              | 4.673607                | -2.32243 | -0.07112 |
| C              | 5.410869                | -3.4993  | 0.042695 |
| C              | 4.758957                | -4.71029 | -0.1679  |
| C              | 3.399018                | -4.75271 | -0.49623 |
| C              | 2.662196                | -3.57936 | -0.62409 |
| C              | 3.310731                | -2.36861 | -0.4073  |
| C              | 2.75587                 | -0.99299 | -0.47817 |
| C              | 3.84723                 | -0.13312 | -0.20368 |
| C              | 5.070599                | -0.91841 | 0.079118 |
| Te             | 3.715274                | 1.832806 | 0.486301 |
| C              | 5.777664                | 2.012212 | 0.503632 |
| C              | 6.647013                | 0.982292 | 0.437733 |
| C              | 6.301288                | -0.414   | 0.334479 |
| C              | 3.466395                | -0.22098 | -2.01888 |
| H              | 6.46605                 | -3.47986 | 0.300405 |
| H              | 5.313384                | -5.63909 | -0.07126 |
| H              | 2.915034                | -5.7121  | -0.65092 |
| H              | 1.606695                | -3.60082 | -0.87775 |
| H              | 6.145039                | 3.026906 | 0.631455 |
| H              | 7.707965                | 1.210992 | 0.508764 |
| H              | 7.112927                | -1.12287 | 0.482145 |
| H              | 4.526611                | -0.17706 | -2.27384 |
| H              | 2.942805                | 0.706308 | -2.23151 |
| H              | 3.018716                | -1.043   | -2.581   |
| Pt             | 0.782533                | -0.58494 | -0.26608 |
| P              | 1.478595                | 0.038413 | -0.01516 |

---

|   |          |          |          |
|---|----------|----------|----------|
| C | 1.590811 | 1.632549 | -0.90994 |
| C | 2.792994 | -1.05278 | -0.65907 |
| C | 2.120982 | 0.30454  | 1.679987 |
| C | 0.803908 | 2.677109 | -0.42287 |
| C | 2.185076 | 1.824401 | -2.15363 |
| C | 4.116052 | -0.6158  | -0.72876 |
| C | 2.542715 | -2.38352 | -0.98965 |
| C | 2.044494 | -0.80565 | 2.522394 |
| C | 2.651644 | 1.471742 | 2.221586 |
| C | 0.633254 | 3.865874 | -1.10817 |
| F | 0.17897  | 2.538341 | 0.748335 |
| C | 2.032206 | 3.011122 | -2.86042 |
| F | 2.911754 | 0.874772 | -2.73678 |
| C | 5.145658 | -1.43636 | -1.15206 |
| F | 4.416167 | 0.639282 | -0.38983 |
| C | 3.56205  | -3.22756 | -1.41544 |
| F | 1.332211 | -2.91336 | -0.87991 |
| C | 2.431788 | -0.75963 | 3.850995 |
| F | 1.614053 | -1.96902 | 2.036759 |
| C | 3.041229 | 1.544809 | 3.552573 |
| F | 2.824988 | 2.568328 | 1.485631 |
| C | 1.255495 | 4.033288 | -2.33864 |
| F | 0.122768 | 4.835922 | -0.60211 |
| F | 2.621777 | 3.162087 | -4.04219 |
| C | 4.861215 | -2.75174 | -1.501   |
| F | 6.392841 | -0.98233 | -1.22284 |
| F | 3.297102 | -4.49201 | -1.72595 |
| C | 2.925941 | 0.429625 | 4.369447 |
| F | 2.342211 | -1.83821 | 4.62088  |
| F | 3.54046  | 2.676512 | 4.04107  |
| F | 1.104891 | 5.166011 | -3.01071 |
| F | 5.836131 | -3.55248 | -1.90425 |
| F | 3.305612 | 0.494438 | 5.637639 |

---

**Table S43.** Calculated orientation for intermediate **x** ( $E = -4334.100238$  Hartree).

| Atomic<br>Name | Coordinates (Angstroms) |          |          |
|----------------|-------------------------|----------|----------|
|                | X                       | Y        | Z        |
| Cl             | 1.544982                | -0.03288 | 1.73191  |
| Cl             | -0.03322                | -0.22376 | -2.77592 |
| C              | 3.64472                 | -2.48339 | -0.2149  |
| C              | 3.733841                | -3.83765 | 0.10004  |
| C              | 3.108313                | -4.75564 | -0.7355  |
| C              | 2.406256                | -4.32332 | -1.86689 |
| C              | 2.300762                | -2.97112 | -2.17407 |
| C              | 2.915891                | -2.04514 | -1.33311 |
| C              | 2.910499                | -0.5505  | -1.38969 |
| C              | 3.797496                | -0.17257 | -0.31813 |
| C              | 4.226753                | -1.30685 | 0.438284 |
| Te             | 4.494588                | 1.70011  | 0.044189 |
| C              | 5.571052                | 1.122701 | 1.67049  |
| C              | 5.656073                | -0.15591 | 2.131132 |
| C              | 5.046939                | -1.29268 | 1.54346  |
| C              | 3.111357                | 0.149815 | -2.72819 |
| H              | 4.283468                | -4.17635 | 0.974122 |
| H              | 3.166557                | -5.81645 | -0.51094 |
| H              | 1.926816                | -5.05572 | -2.51003 |
| H              | 1.724254                | -2.63864 | -3.03136 |
| H              | 6.100599                | 1.923692 | 2.17804  |
| H              | 6.263789                | -0.32901 | 3.015663 |
| H              | 5.268176                | -2.25    | 2.008822 |
| H              | 4.155705                | 0.03776  | -3.05053 |
| H              | 2.875328                | 1.218374 | -2.67203 |
| H              | 2.467108                | -0.27458 | -3.49704 |
| Pt             | 0.865423                | -0.19775 | -0.54654 |
| P              | -1.33827                | 0.133812 | 0.032986 |
| C              | -1.83875                | 1.716651 | -0.73986 |

---

|   |          |          |          |
|---|----------|----------|----------|
| C | -2.55096 | -1.13923 | -0.47177 |
| C | -1.77413 | 0.22349  | 1.813458 |
| C | -1.15261 | 2.857302 | -0.32138 |
| C | -2.67274 | 1.858288 | -1.84574 |
| C | -3.91754 | -0.90921 | -0.30646 |
| C | -2.16873 | -2.40864 | -0.90495 |
| C | -1.46961 | -0.91551 | 2.561877 |
| C | -2.36283 | 1.284054 | 2.496129 |
| C | -1.30481 | 4.0872   | -0.93549 |
| F | -0.31498 | 2.777988 | 0.712639 |
| C | -2.84269 | 3.082985 | -2.47909 |
| F | -3.33423 | 0.827353 | -2.36347 |
| C | -4.87358 | -1.86315 | -0.60354 |
| F | -4.34004 | 0.274434 | 0.143796 |
| C | -3.11318 | -3.38319 | -1.20895 |
| F | -0.89722 | -2.76091 | -1.01202 |
| C | -1.69481 | -0.99213 | 3.925532 |
| F | -0.96569 | -1.98837 | 1.954824 |
| C | -2.59326 | 1.232941 | 3.864971 |
| F | -2.7538  | 2.392422 | 1.869481 |
| C | -2.15862 | 4.199221 | -2.02479 |
| F | -0.63974 | 5.150981 | -0.49424 |
| F | -3.65341 | 3.1825   | -3.52823 |
| C | -4.46369 | -3.10933 | -1.06236 |
| F | -6.16771 | -1.6003  | -0.44936 |
| F | -2.72186 | -4.58414 | -1.62227 |
| C | -2.25329 | 0.096094 | 4.58194  |
| F | -1.38606 | -2.09351 | 4.601826 |
| F | -3.15551 | 2.266373 | 4.485466 |
| F | -2.31763 | 5.369422 | -2.62712 |
| F | -5.36516 | -4.0376  | -1.34678 |
| F | -2.47853 | 0.041369 | 5.887227 |

---

**Table S44.** Calculated orientation for intermediate **y** ( $E = -769.2235746$  Hartree).

| Atomic<br>Name | Coordinates (Angstroms) |          |          |
|----------------|-------------------------|----------|----------|
|                | X                       | Y        | Z        |
| C              | 1.951373                | 0.729473 | -0.00003 |
| C              | 3.060581                | 1.566782 | -5.7E-05 |
| C              | 4.331732                | 0.993814 | -1.9E-05 |
| C              | 4.485718                | -0.39583 | 0.000033 |
| C              | 3.37655                 | -1.24018 | 0.00005  |
| C              | 2.104418                | -0.67199 | 0.000016 |
| C              | 0.778432                | -1.29825 | -6E-06   |
| C              | -0.1464                 | -0.30382 | -0.00001 |
| C              | 0.510205                | 1.014565 | -1.2E-05 |
| Te             | -2.22693                | -0.46066 | -4E-06   |
| C              | -2.48455                | 1.59777  | 0.00002  |
| C              | -1.49377                | 2.509106 | 0.000035 |
| C              | -0.07352                | 2.235429 | 0.000019 |
| C              | 0.568371                | -2.7768  | -1.4E-05 |
| H              | 2.947239                | 2.6479   | -9.5E-05 |
| H              | 5.210289                | 1.632331 | -3.1E-05 |
| H              | 5.484723                | -0.82297 | 0.000064 |
| H              | 3.506082                | -2.31927 | 0.00009  |
| H              | -3.52296                | 1.916879 | 0.000031 |
| H              | -1.77915                | 3.559121 | 0.000065 |
| H              | 0.580399                | 3.104698 | 0.000023 |
| H              | 1.026851                | -3.24076 | -0.88259 |
| H              | -0.49376                | -3.04366 | -0.00055 |
| H              | 1.025969                | -3.24067 | 0.883068 |

**Table S45.** Calculated orientation for catalyst **Pt[P(C<sub>6</sub>F<sub>5</sub>)<sub>3</sub>]Cl<sub>2</sub>** ( $E = -3564.863562$  Hartree).

| Atomic<br>Name | Coordinates (Angstroms) |          |          |
|----------------|-------------------------|----------|----------|
|                | X                       | Y        | Z        |
| Cl             | 1.426024                | 1.90765  | 2.343108 |
| Cl             | -0.43324                | -2.33424 | 2.684219 |
| P              | 0.040294                | 0.008675 | 0.154791 |
| C              | 1.682913                | 0.113171 | -0.61659 |
| C              | -0.963                  | 1.438476 | -0.35045 |
| C              | -0.90773                | -1.35015 | -0.60367 |
| C              | 2.511115                | -1.00792 | -0.51773 |
| C              | 2.250857                | 1.284031 | -1.11798 |
| C              | -1.07909                | 1.711278 | -1.71601 |
| C              | -1.72766                | 2.209971 | 0.525579 |
| C              | -2.18191                | -1.58225 | -0.07619 |
| C              | -0.51059                | -2.14303 | -1.68003 |
| C              | 3.827766                | -0.99199 | -0.94015 |
| F              | 2.030276                | -2.13626 | -0.00225 |
| C              | 3.570303                | 1.321065 | -1.54719 |
| F              | 1.560371                | 2.416027 | -1.19337 |
| C              | -1.86908                | 2.735441 | -2.20145 |
| F              | -0.39845                | 0.970579 | -2.5927  |
| C              | -2.52991                | 3.24412  | 0.056316 |
| F              | -1.75241                | 1.9797   | 1.827917 |
| C              | -3.00589                | -2.58781 | -0.54995 |
| F              | -2.6434                 | -0.80441 | 0.899294 |
| C              | -1.32168                | -3.15786 | -2.16897 |
| F              | 0.647674                | -1.94981 | -2.30235 |
| C              | 4.358821                | 0.183143 | -1.4582  |
| F              | 4.579657                | -2.0806  | -0.84792 |
| F              | 4.079607                | 2.445582 | -2.03356 |
| C              | -2.59641                | 3.50908  | -1.30296 |

---

|    |          |          |          |
|----|----------|----------|----------|
| F  | -1.9406  | 2.978007 | -3.50384 |
| F  | -3.24473 | 3.9673   | 0.907372 |
| C  | -2.56656 | -3.38453 | -1.59976 |
| F  | -4.20573 | -2.78256 | -0.02082 |
| F  | -0.91489 | -3.89849 | -3.1923  |
| F  | 5.615328 | 0.21581  | -1.86697 |
| F  | -3.36141 | 4.48988  | -1.74937 |
| F  | -3.34292 | -4.34529 | -2.07025 |
| Pt | 0.390887 | -0.19657 | 2.295843 |

---



## 6. $^1\text{H}$ and $^{13}\text{C}$ NMR spectra.

Figure S9.  $^1\text{H}$  NMR spectrum of **2a** in  $\text{CDCl}_3$ .

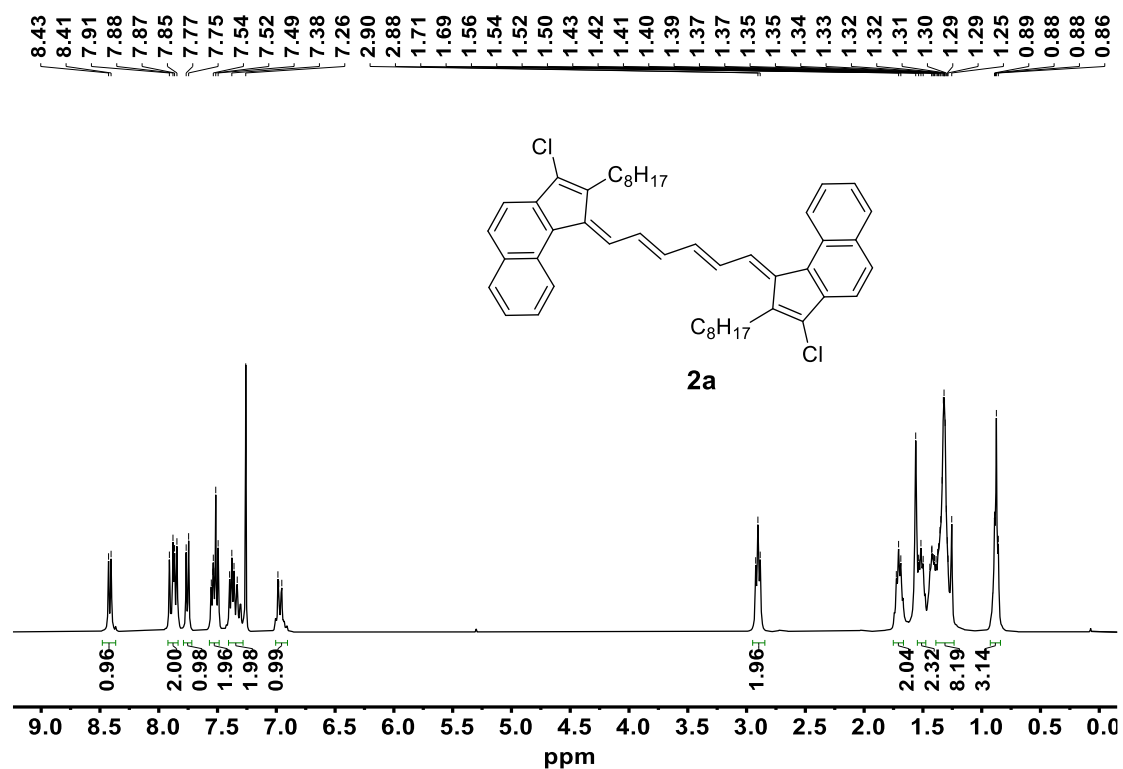

Figure S10.  $^{13}\text{C}$  NMR spectrum of **2a** in  $\text{CDCl}_3$ .

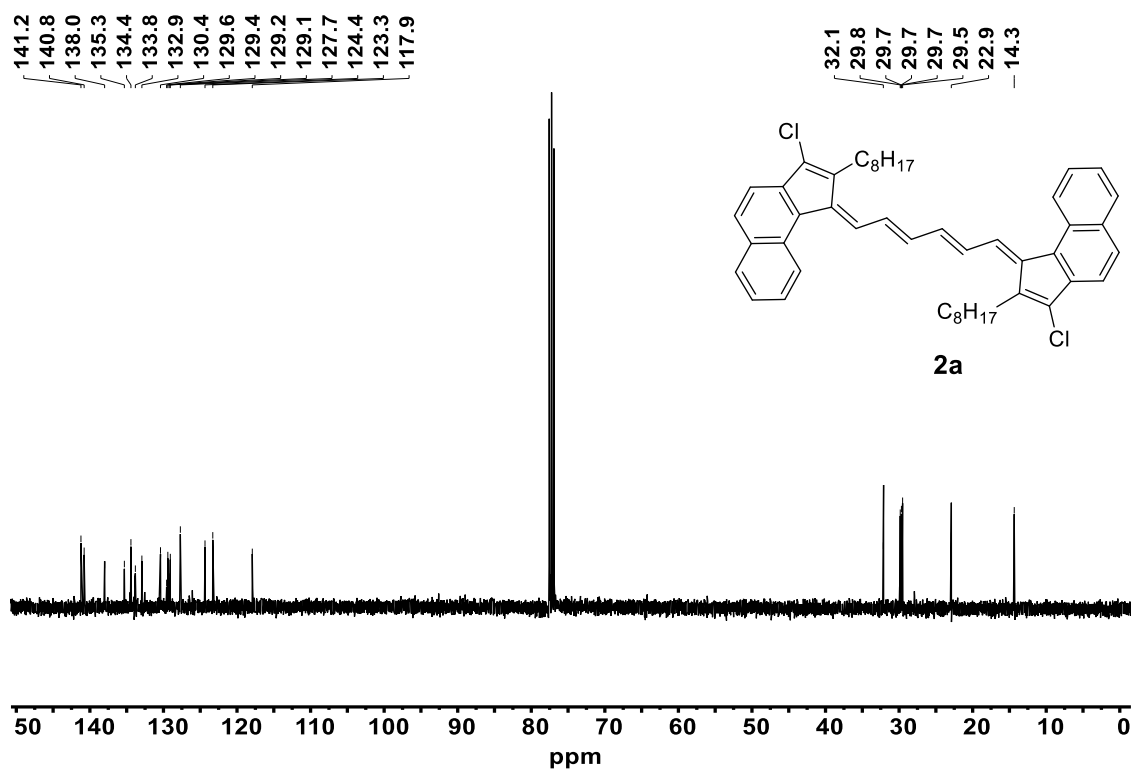

Figure S11.  $^1\text{H}$  NMR spectrum of **2b** in  $\text{CDCl}_3$ .

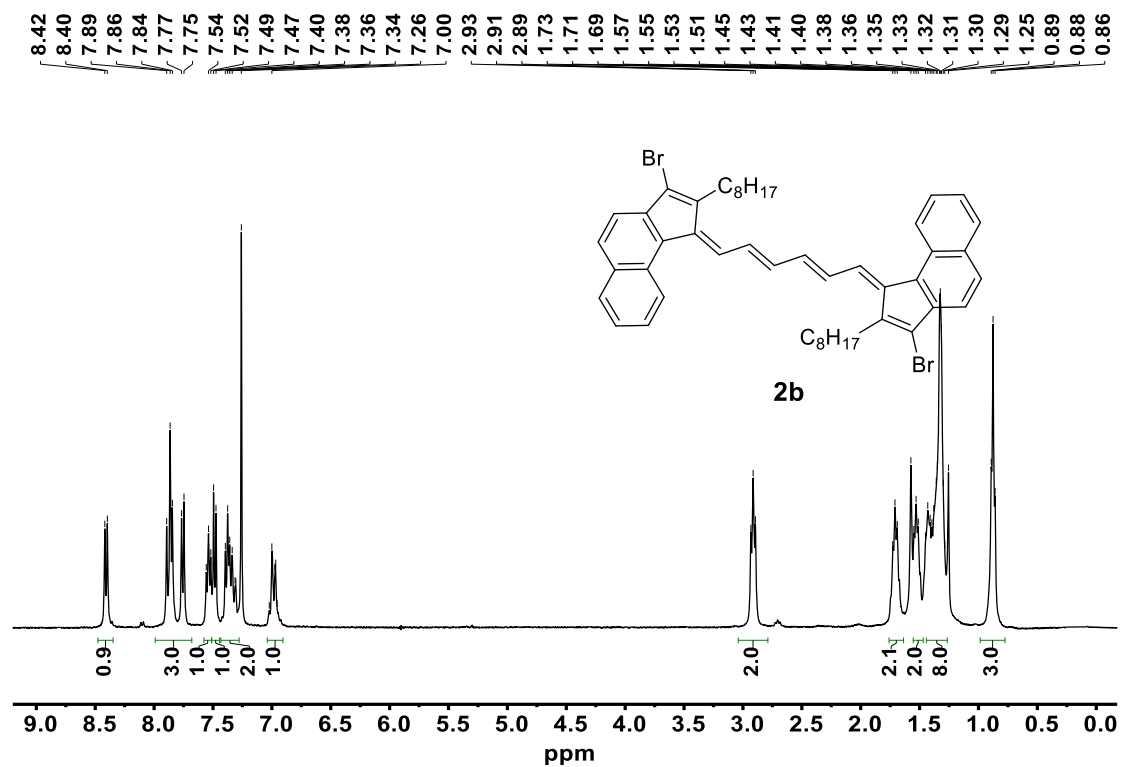

Figure S12.  $^{13}\text{C}$  NMR spectrum of **2b** in  $\text{CDCl}_3$ .

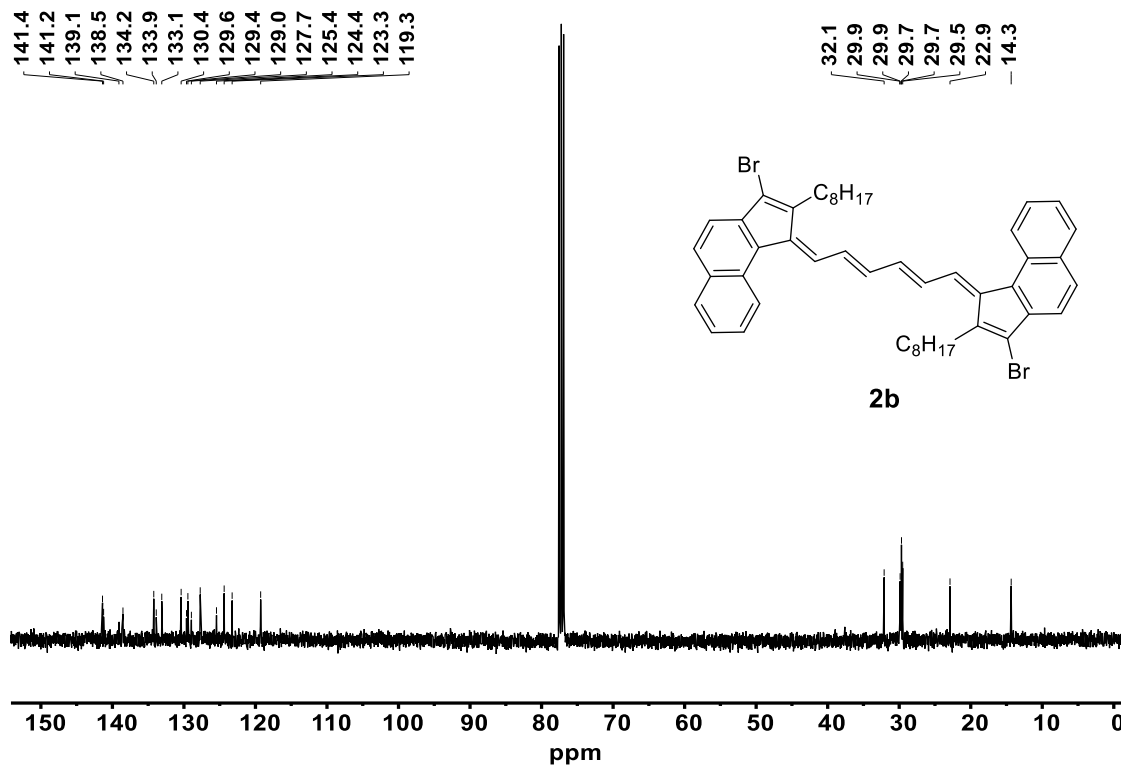

Figure S13.  $^1\text{H}$  NMR spectrum of **3a** in  $\text{CDCl}_3$ .

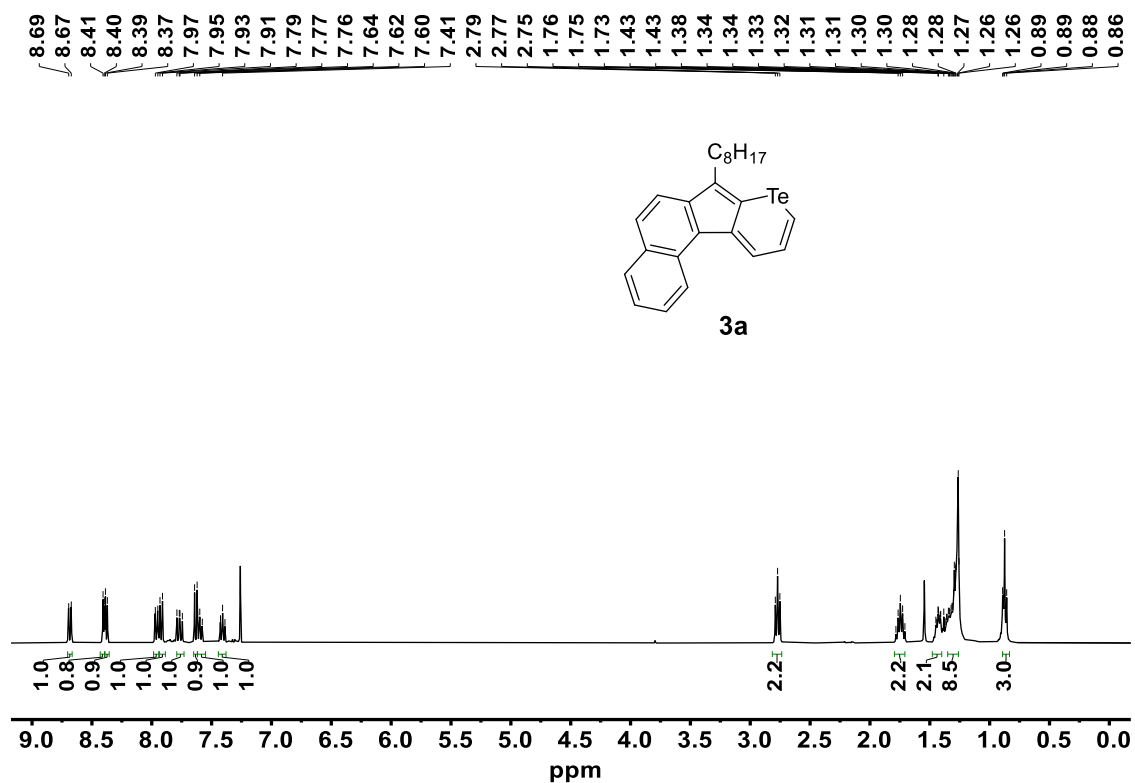

Figure S14.  $^{13}\text{C}$  NMR spectrum of **3a** in  $\text{CDCl}_3$ .

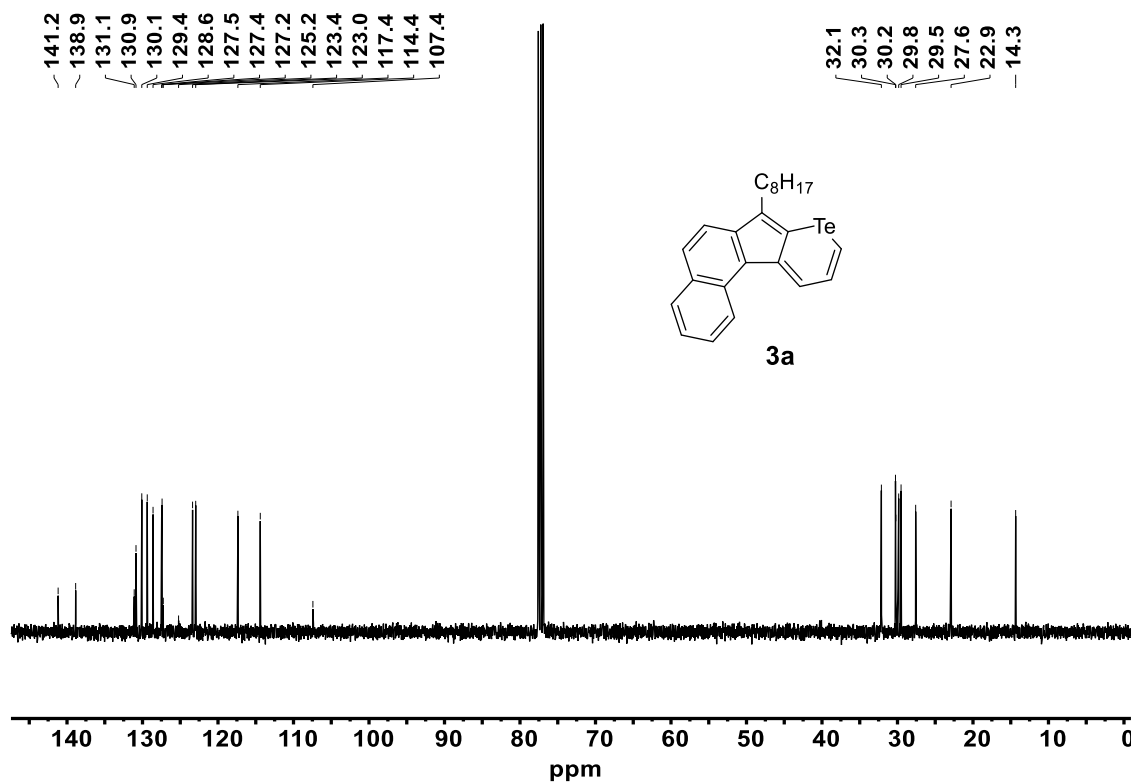

Figure S15.  $^1\text{H}$  NMR spectrum of **3b** in  $\text{CDCl}_3$ .

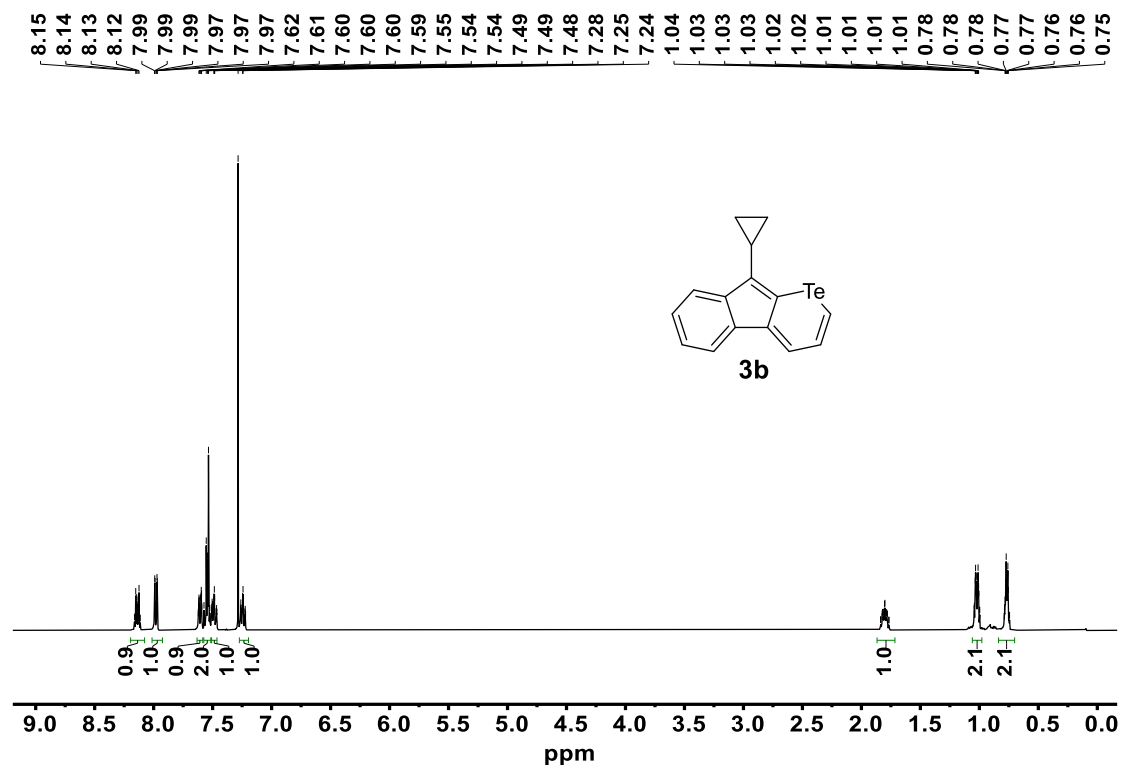

Figure S16.  $^{13}\text{C}$  NMR spectrum of **3b** in  $\text{CDCl}_3$ .

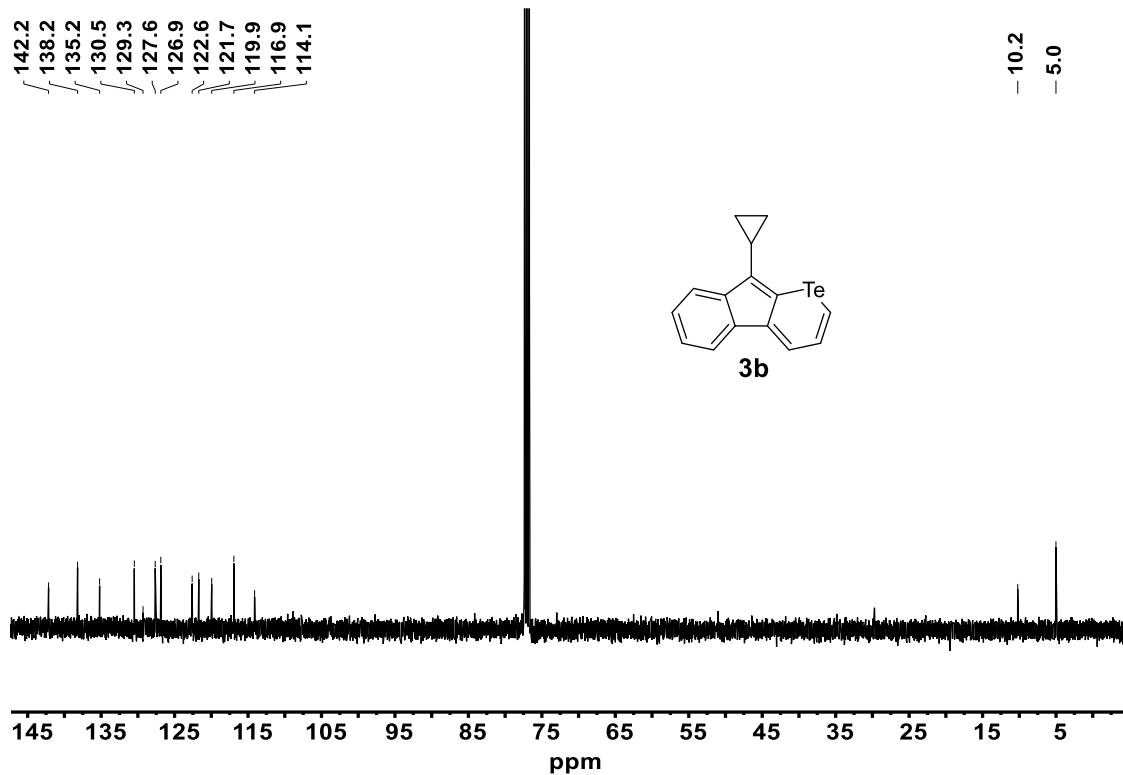

Figure S17.  $^1\text{H}$  NMR spectrum of **3c** in  $\text{CDCl}_3$ .

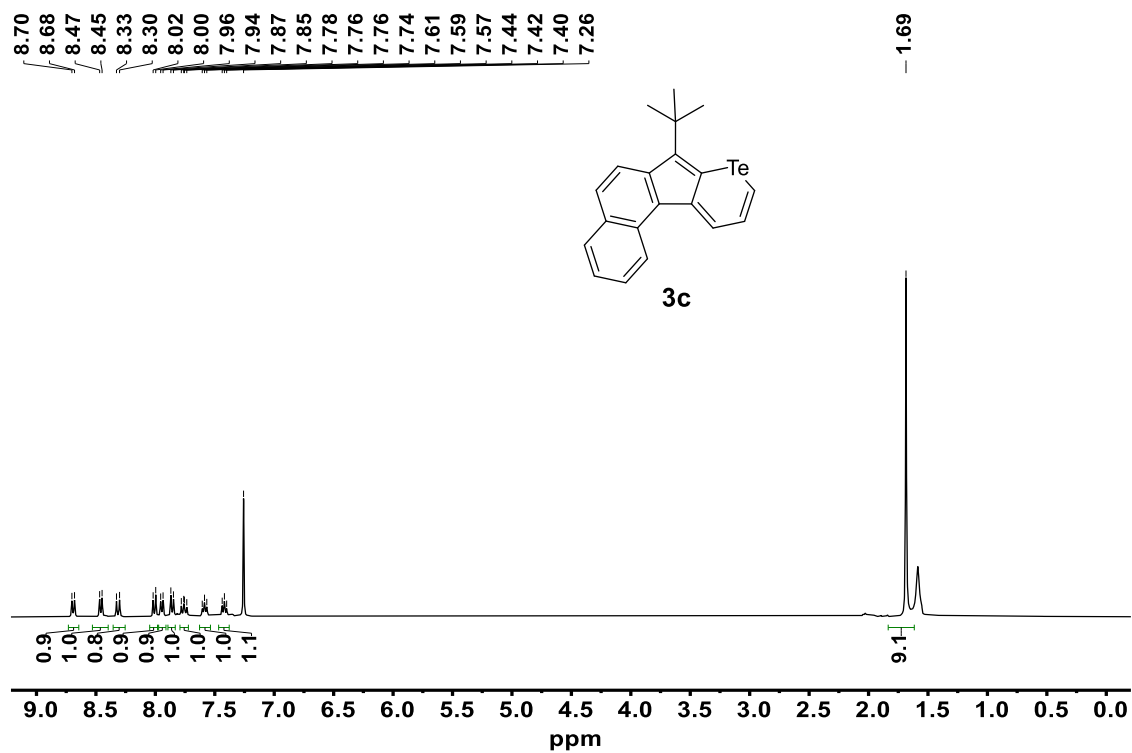

Figure S18.  $^{13}\text{C}$  NMR spectrum of **3c** in  $\text{CDCl}_3$ .

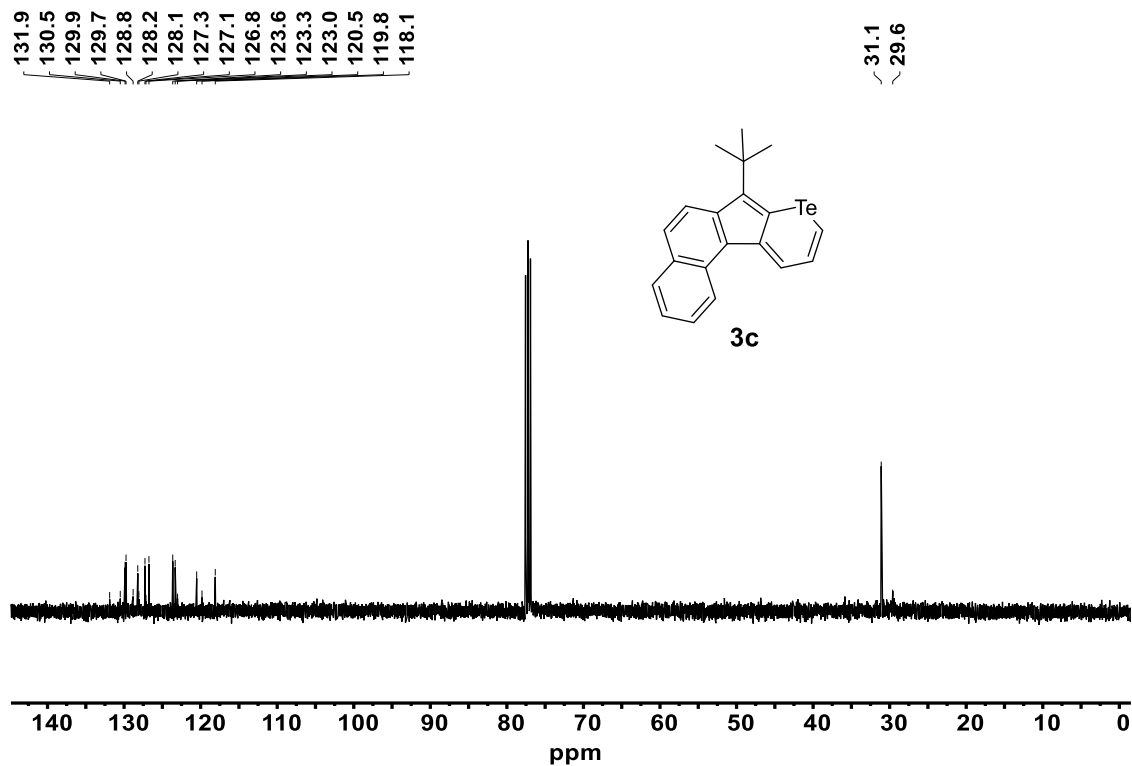

Figure S19.  $^1\text{H}$  NMR spectrum of **3d** in  $\text{CDCl}_3$ .

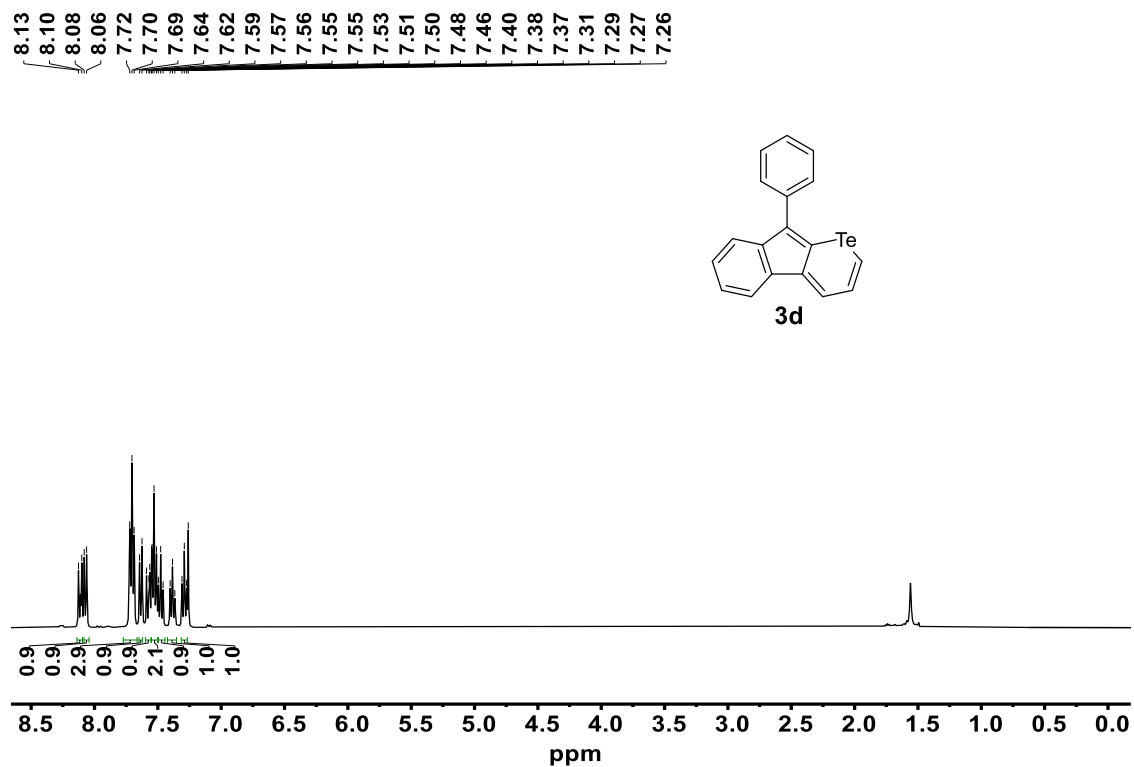

Figure S20.  $^{13}\text{C}$  NMR spectrum of **3d** in  $\text{CDCl}_3$ .

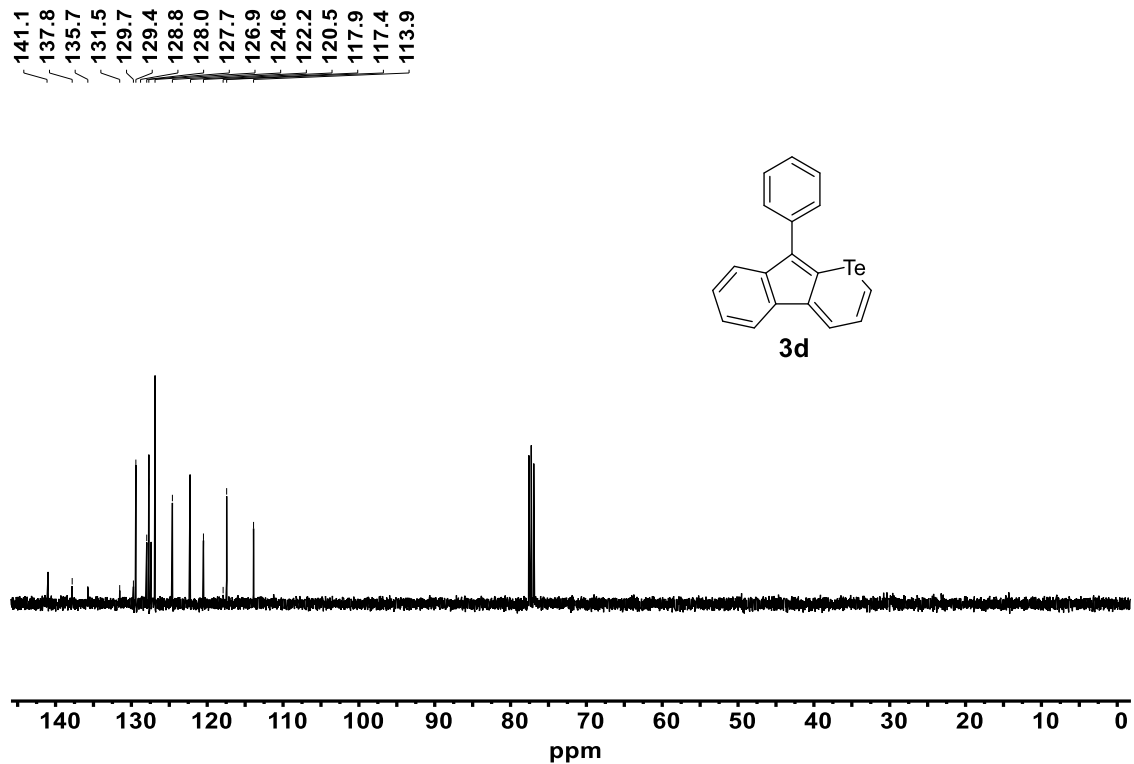

Figure S21.  $^1\text{H}$  NMR spectrum of **3e** in  $\text{CDCl}_3$ .

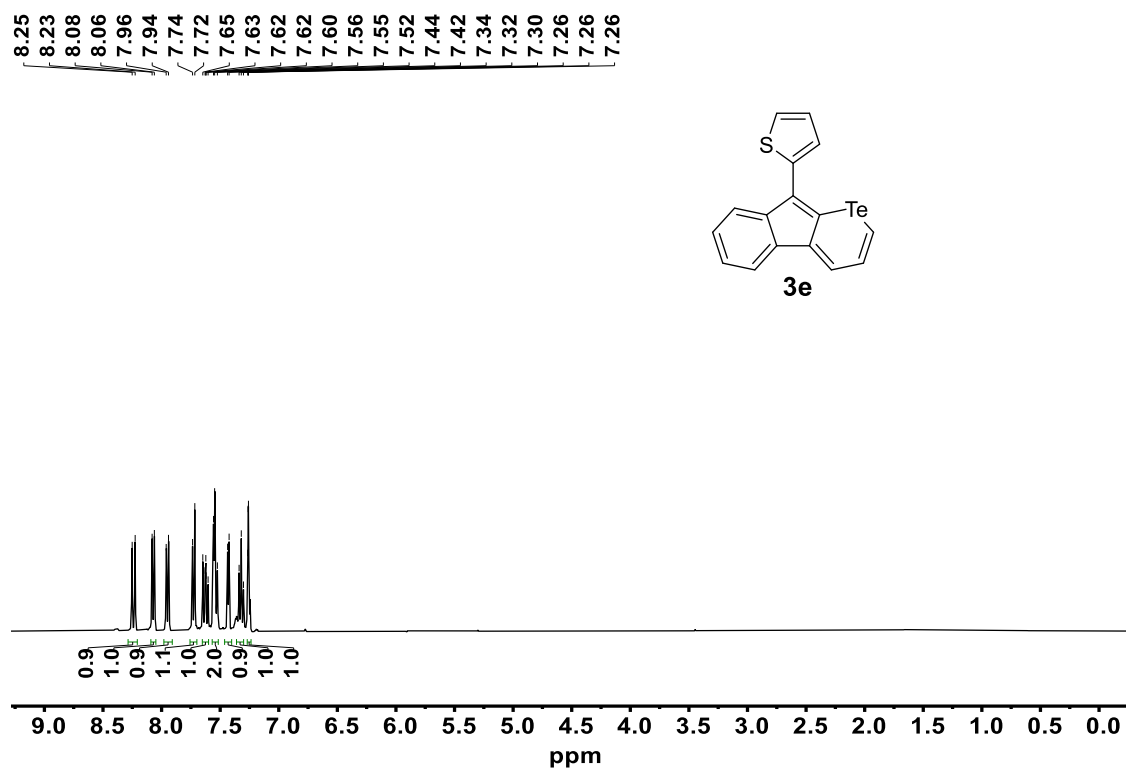

Figure S22.  $^{13}\text{C}$  NMR spectrum of **3e** in  $\text{CDCl}_3$ .

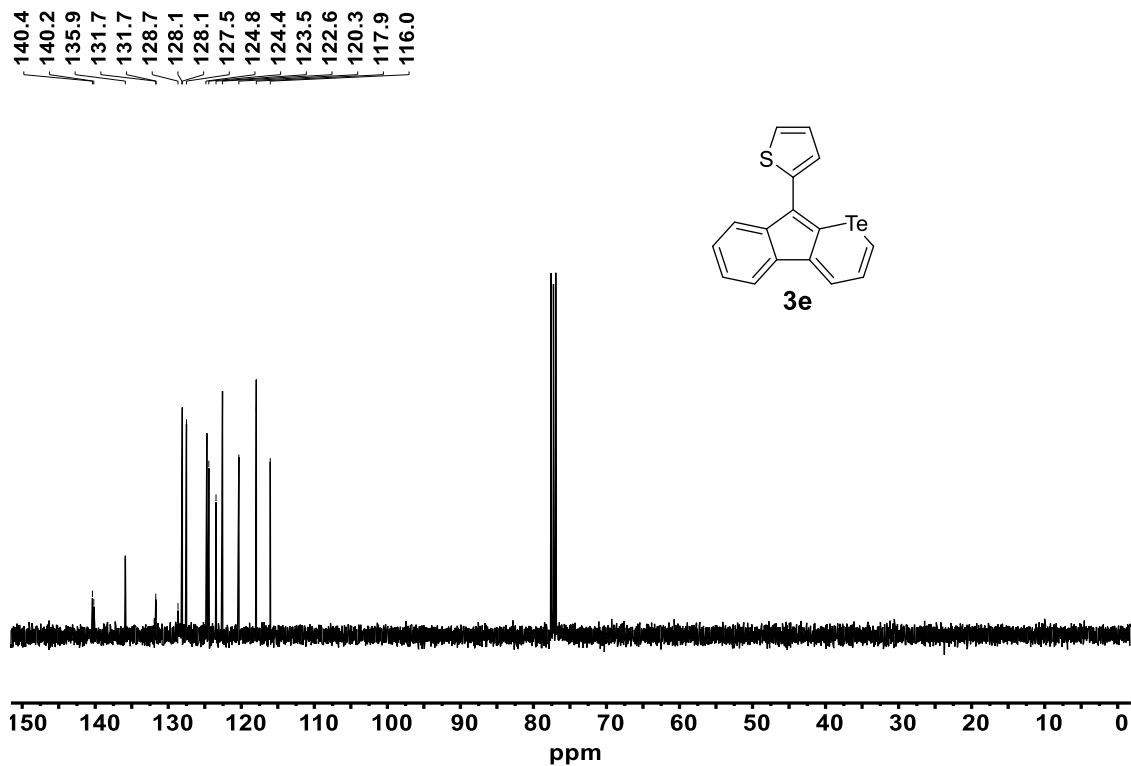

Figure S23.  $^1\text{H}$  NMR spectrum of **3f** in  $\text{CDCl}_3$ .

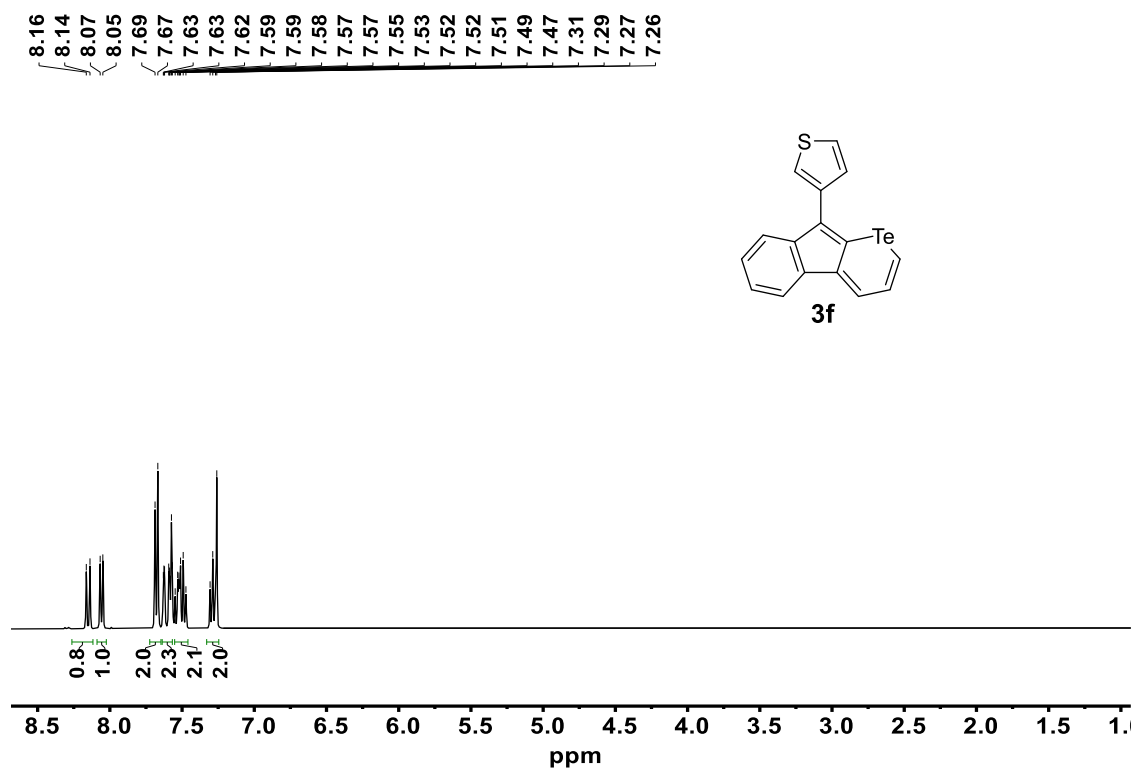

Figure S24.  $^{13}\text{C}$  NMR spectrum of **3f** in  $\text{CDCl}_3$ .

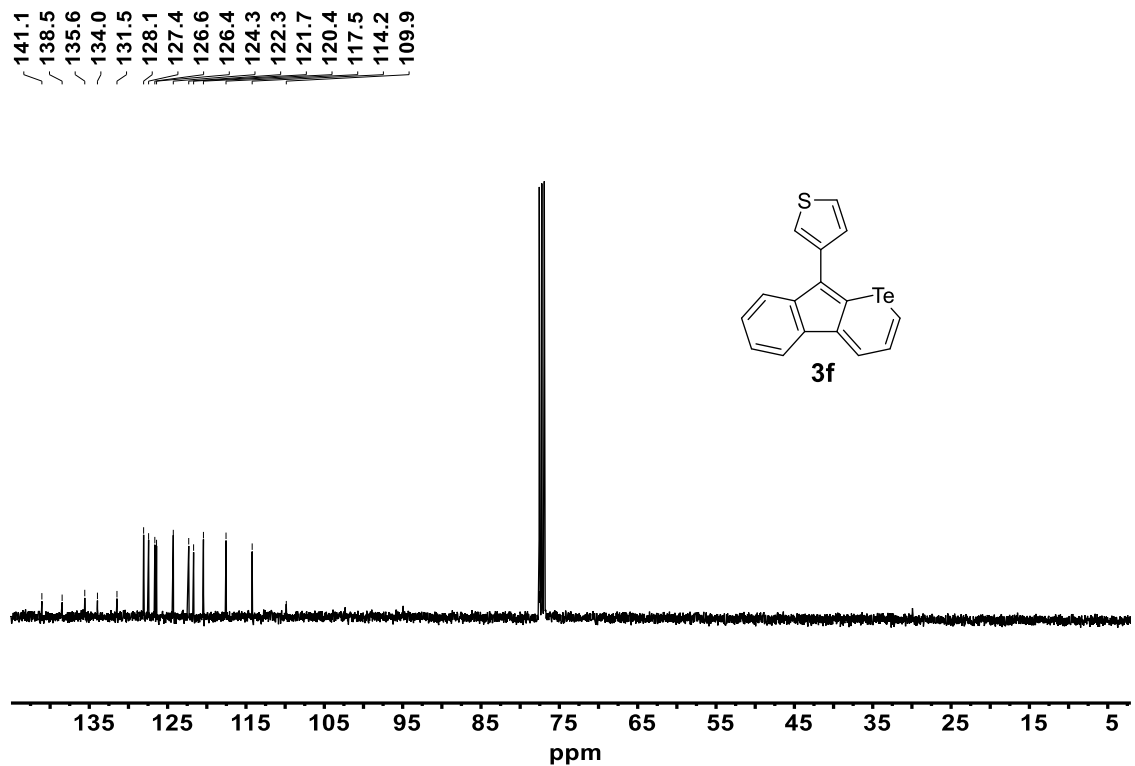



Figure S25  $^1\text{H}$  NMR spectrum of **3g** in  $\text{CDCl}_3$ .

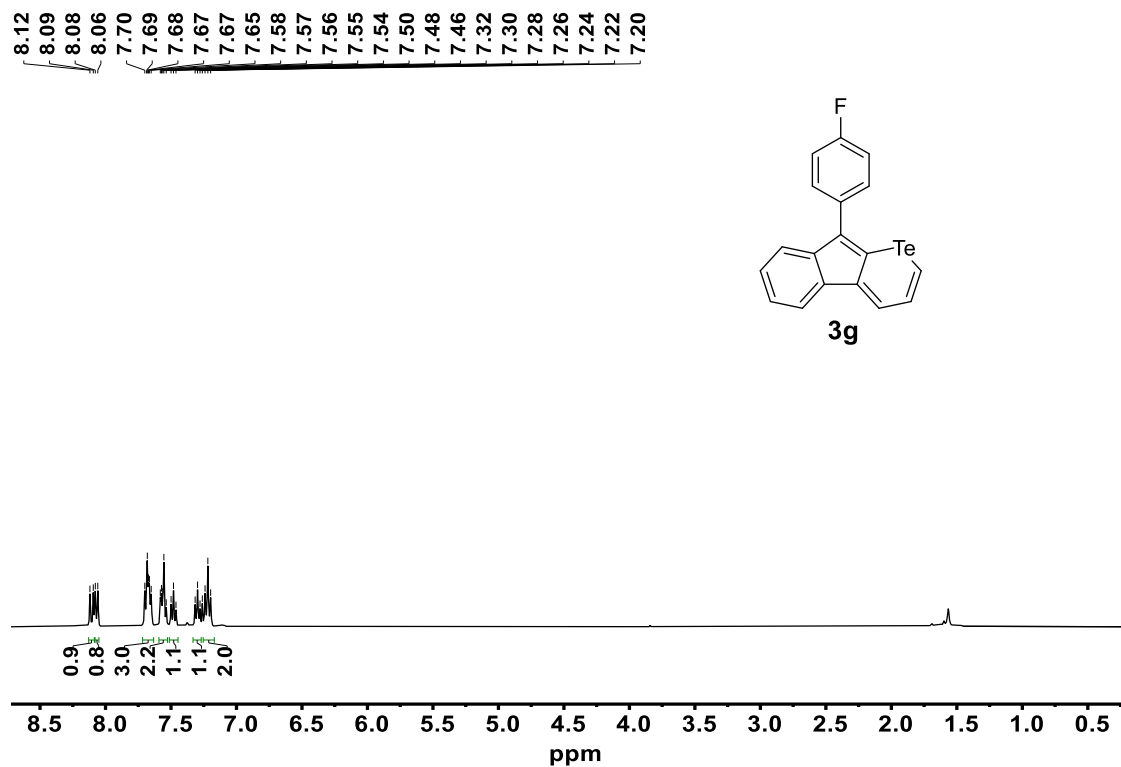

Figure S26.  $^{13}\text{C}$  NMR spectrum of **3g** in  $\text{CDCl}_3$ .

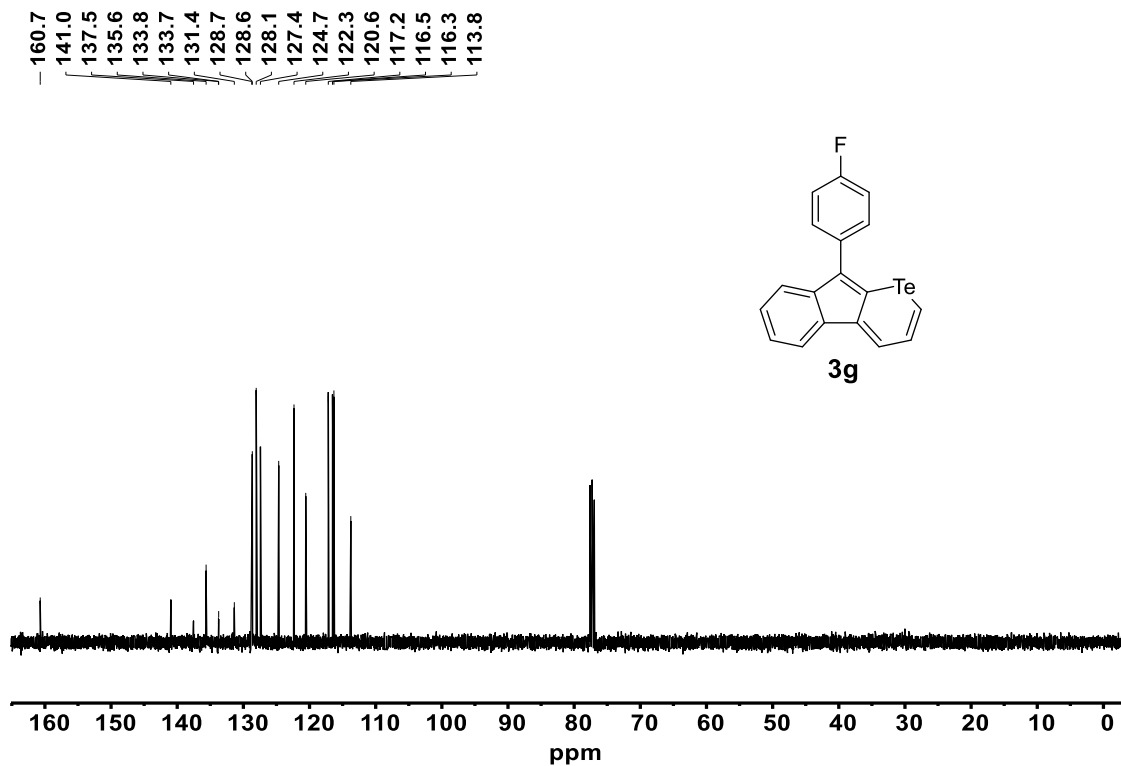

Figure S27.  $^1\text{H}$  NMR spectrum of **3h** in  $\text{CDCl}_3$ .

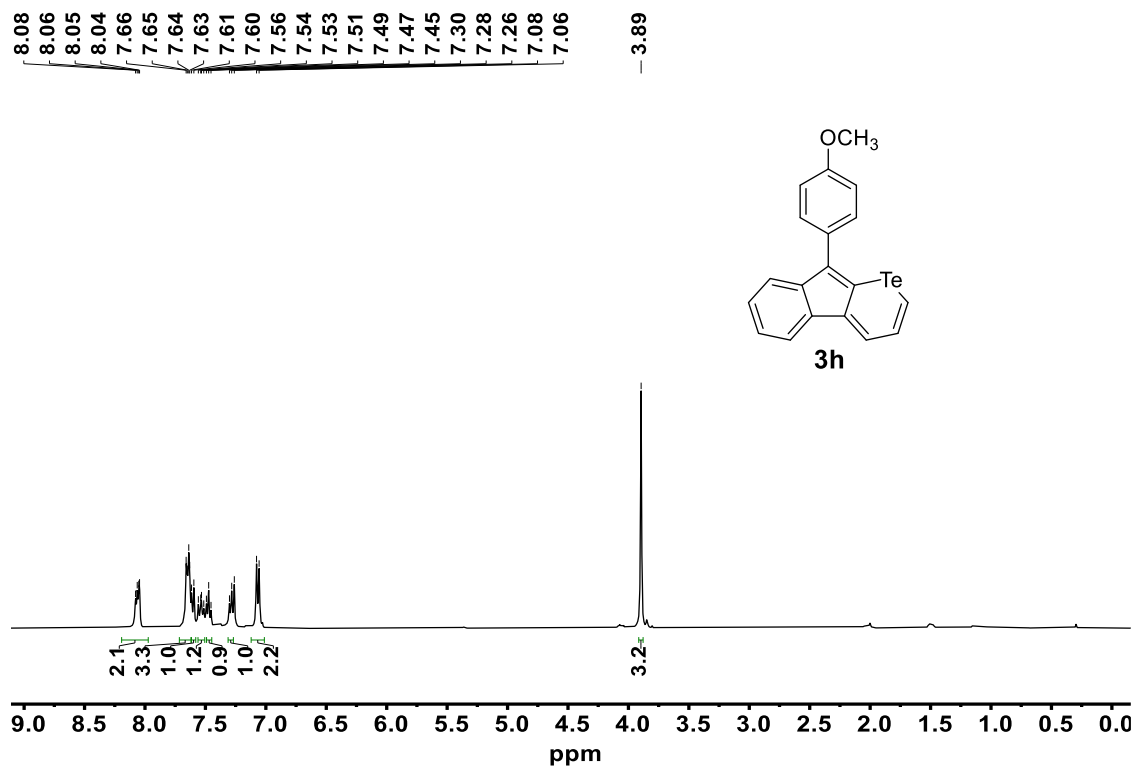

Figure S28.  $^{13}\text{C}$  NMR spectrum of **3h** in  $\text{CDCl}_3$ .

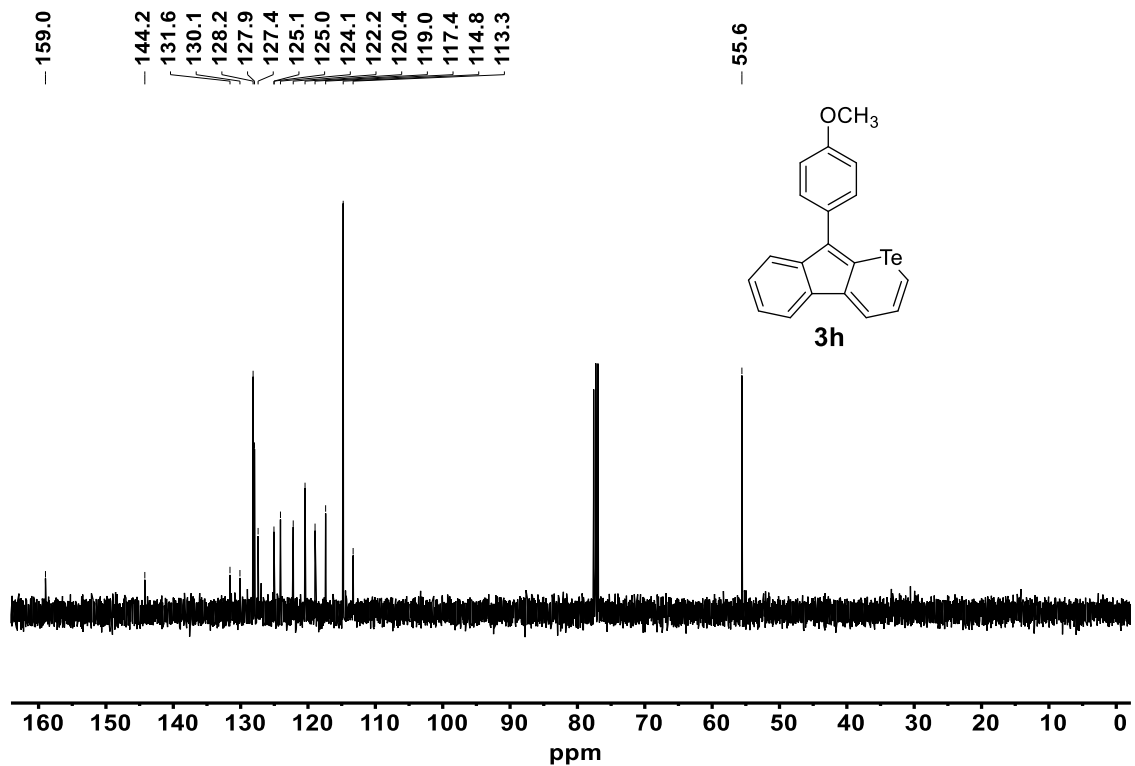

Figure S29.  $^1\text{H}$  NMR spectrum of **3i** in  $\text{CDCl}_3$

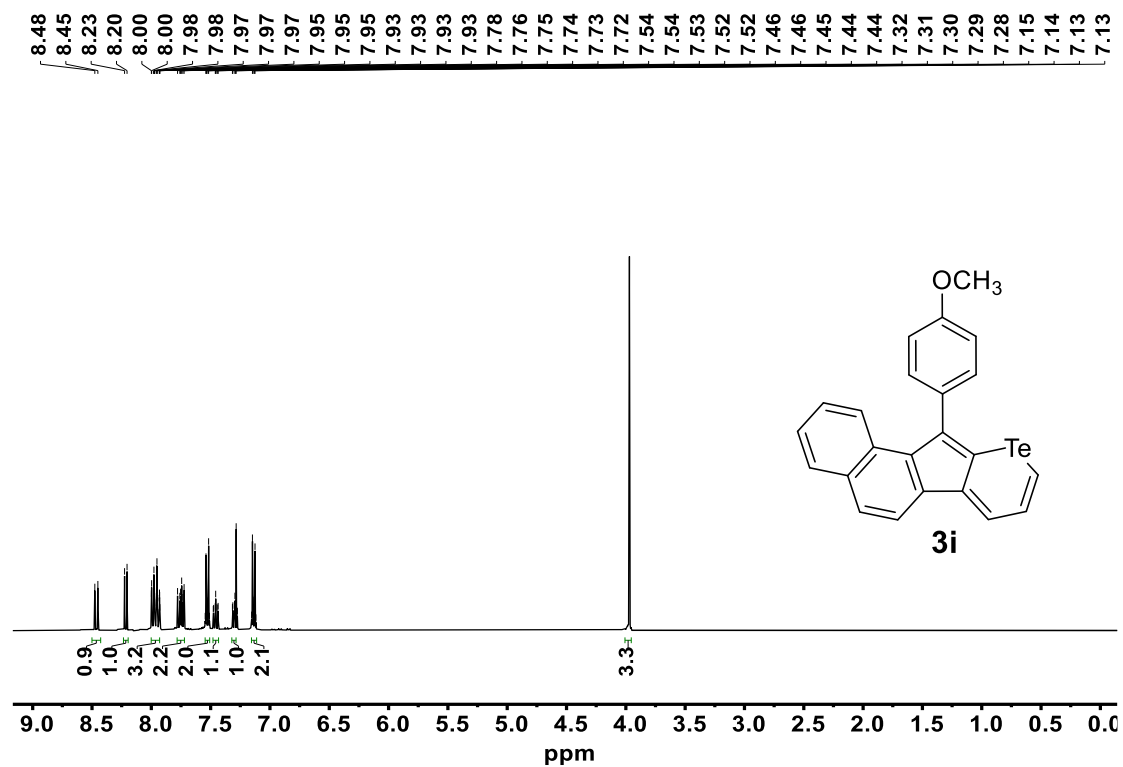

Figure S30.  $^{13}\text{C}$  NMR spectrum of **3i** in  $\text{CDCl}_3$ .

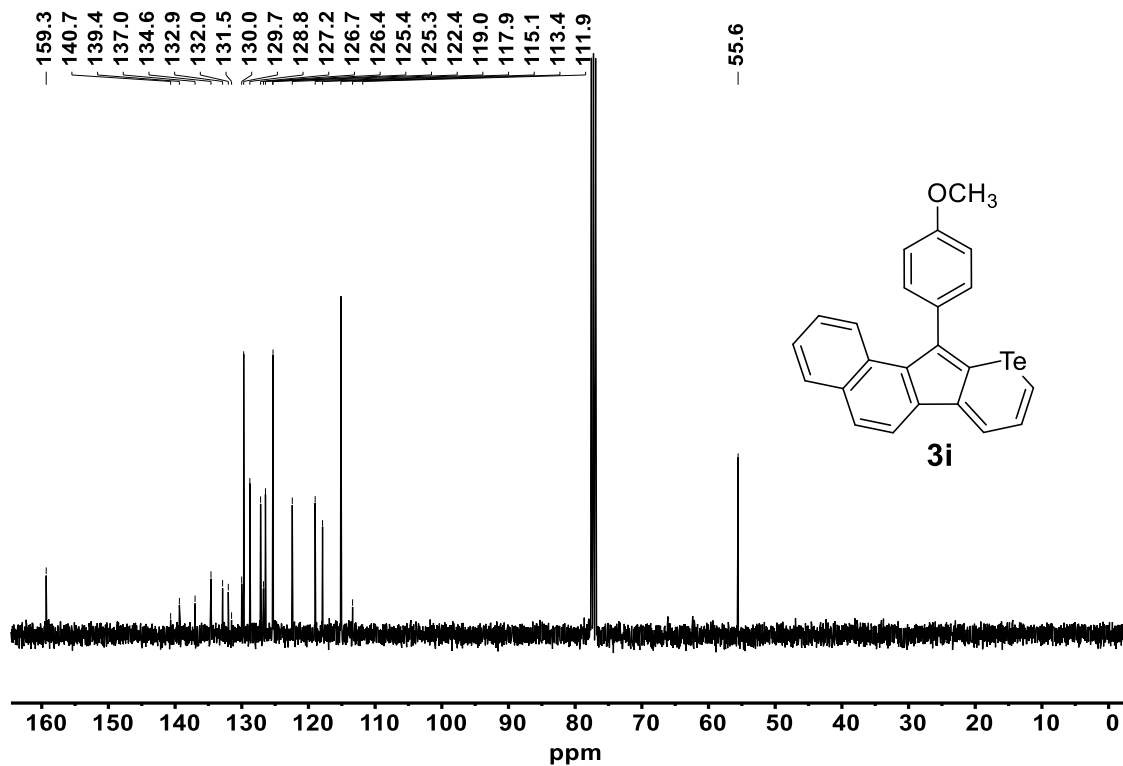

Figure S31.  $^1\text{H}$  NMR spectrum of **3j** in  $\text{CDCl}_3$ .

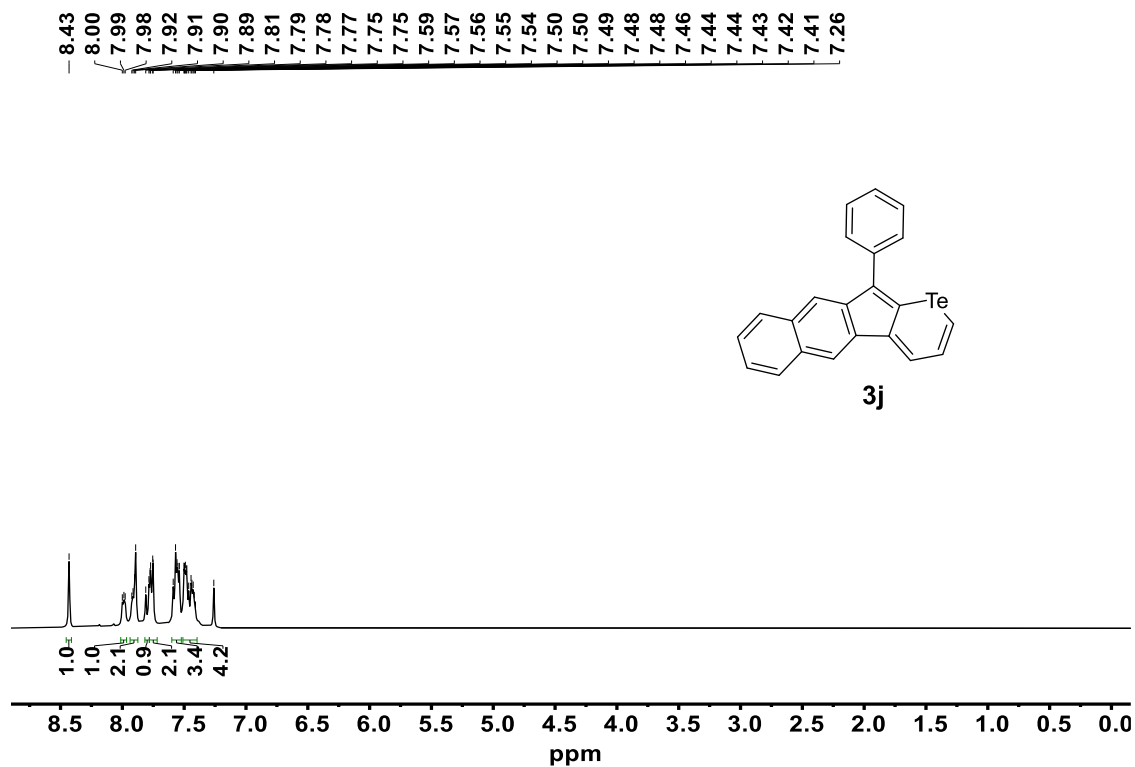

Figure S32.  $^{13}\text{C}$  NMR spectrum of **3j** in  $\text{CDCl}_3$ .

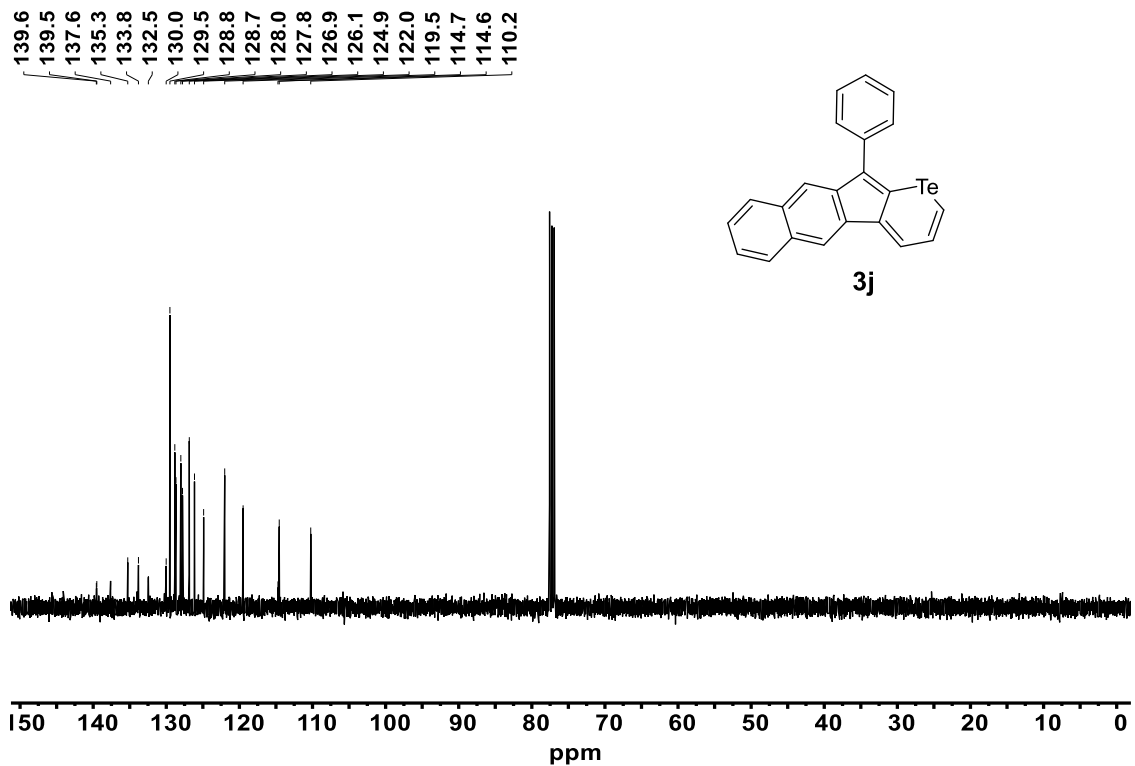

Figure S33.  $^1\text{H}$  NMR spectrum of **3k** in  $\text{CDCl}_3$ .

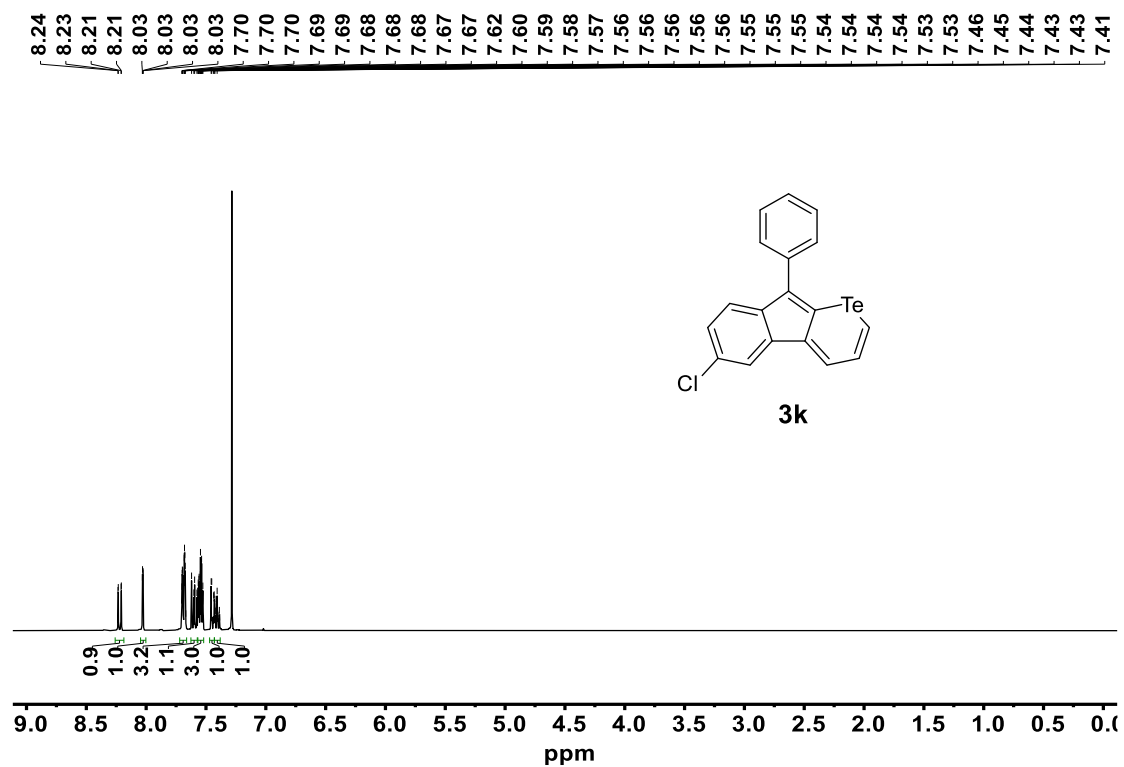

Figure S34.  $^{13}\text{C}$  NMR spectrum of **3k** in  $\text{CDCl}_3$ .

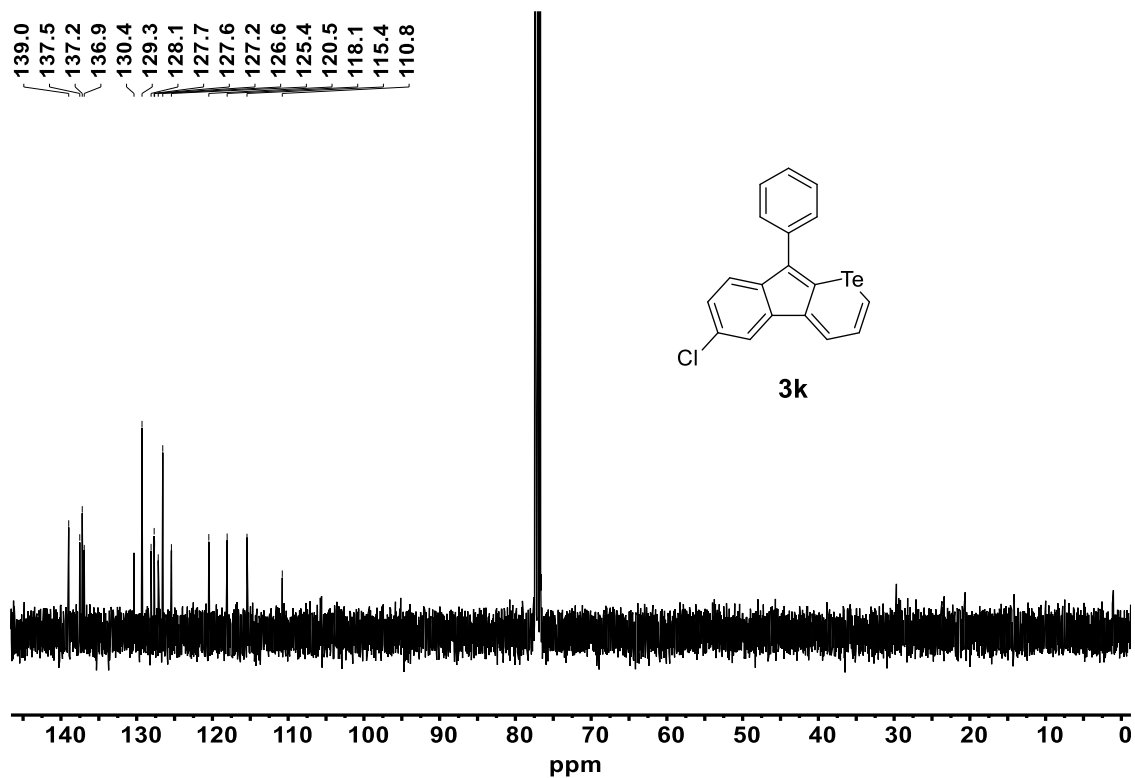

Figure S35.  $^1\text{H}$  NMR spectrum of **3I** in  $\text{CDCl}_3$ .

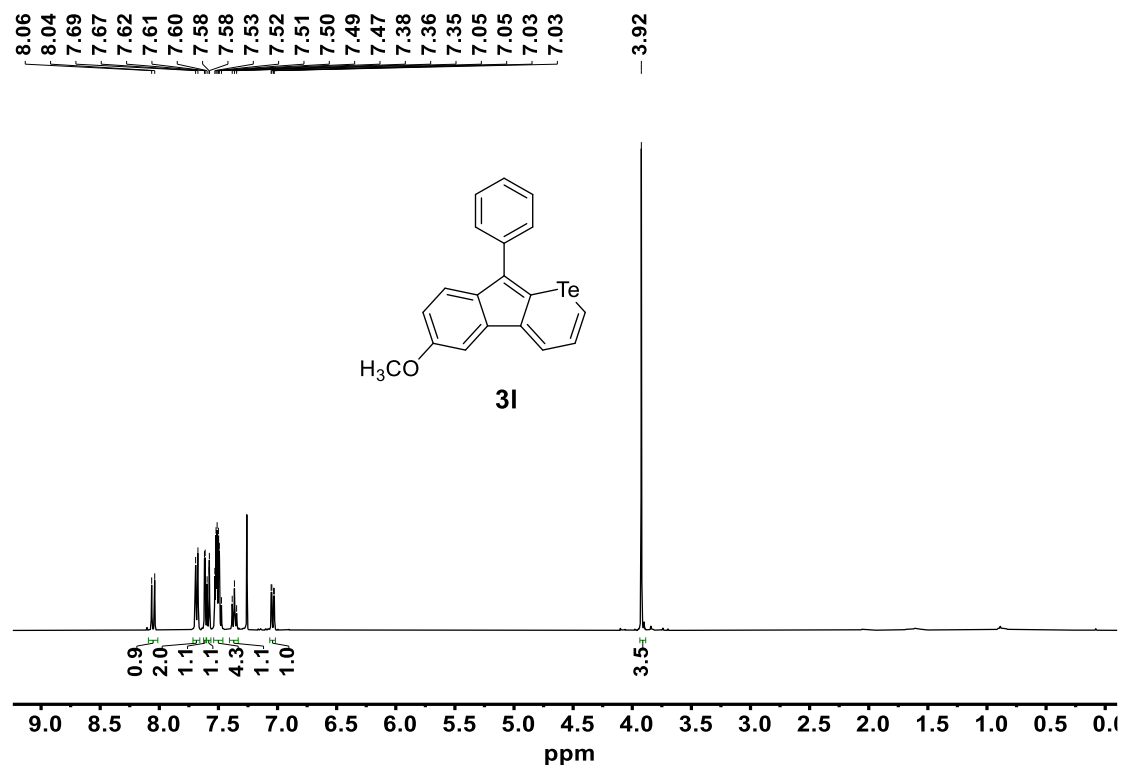

Figure S36.  $^{13}\text{C}$  NMR spectrum of **3I** in  $\text{CDCl}_3$ .

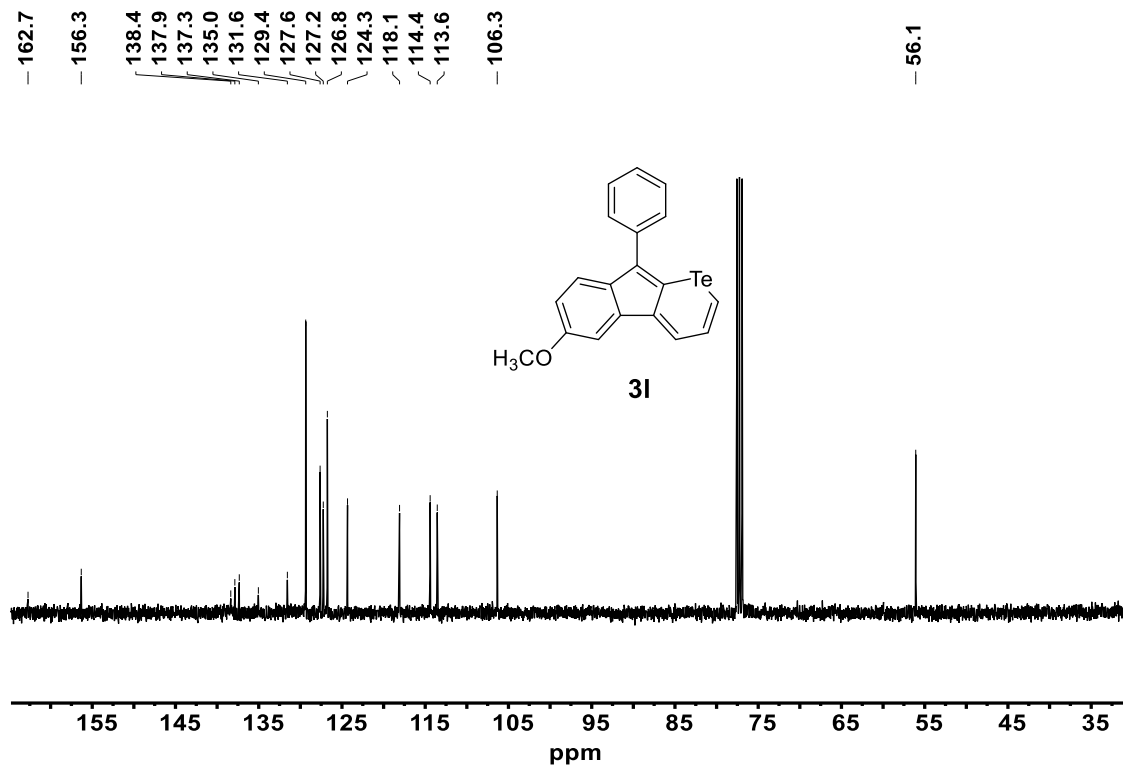

Figure S37.  $^1\text{H}$  NMR spectrum of **2m** in  $\text{CDCl}_3$ .

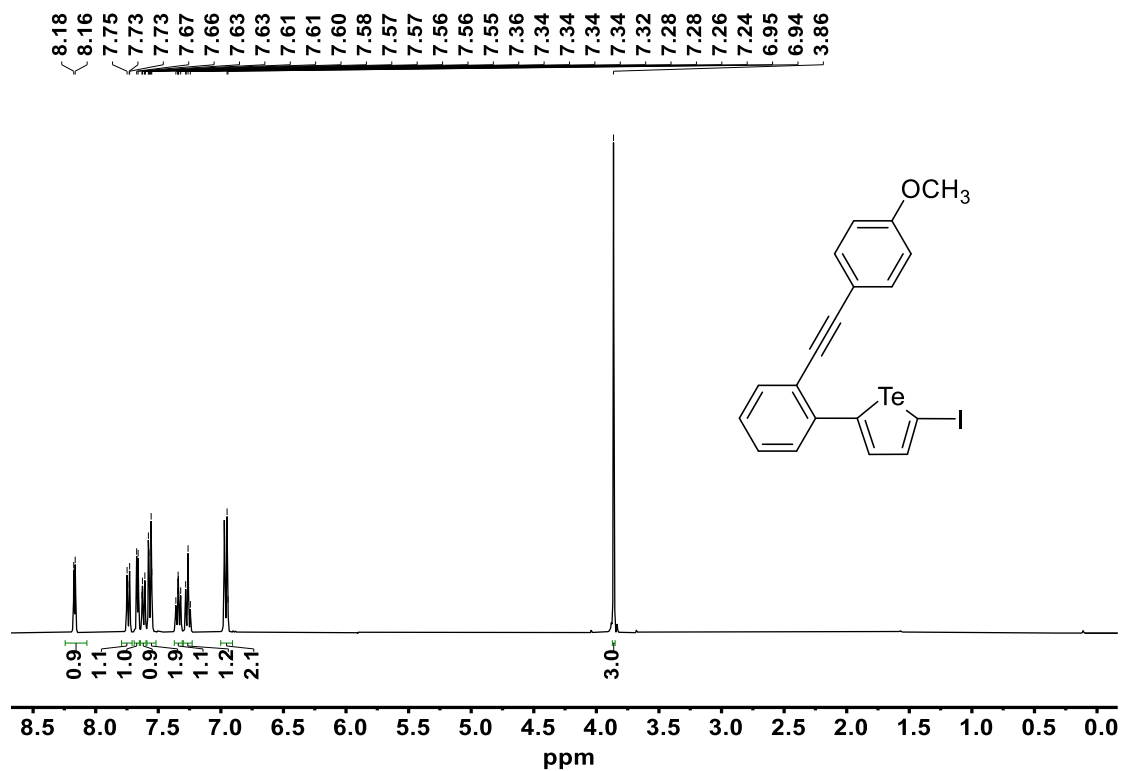

Figure S38.  $^{13}\text{C}$  NMR spectrum of **2m** in  $\text{CDCl}_3$ .

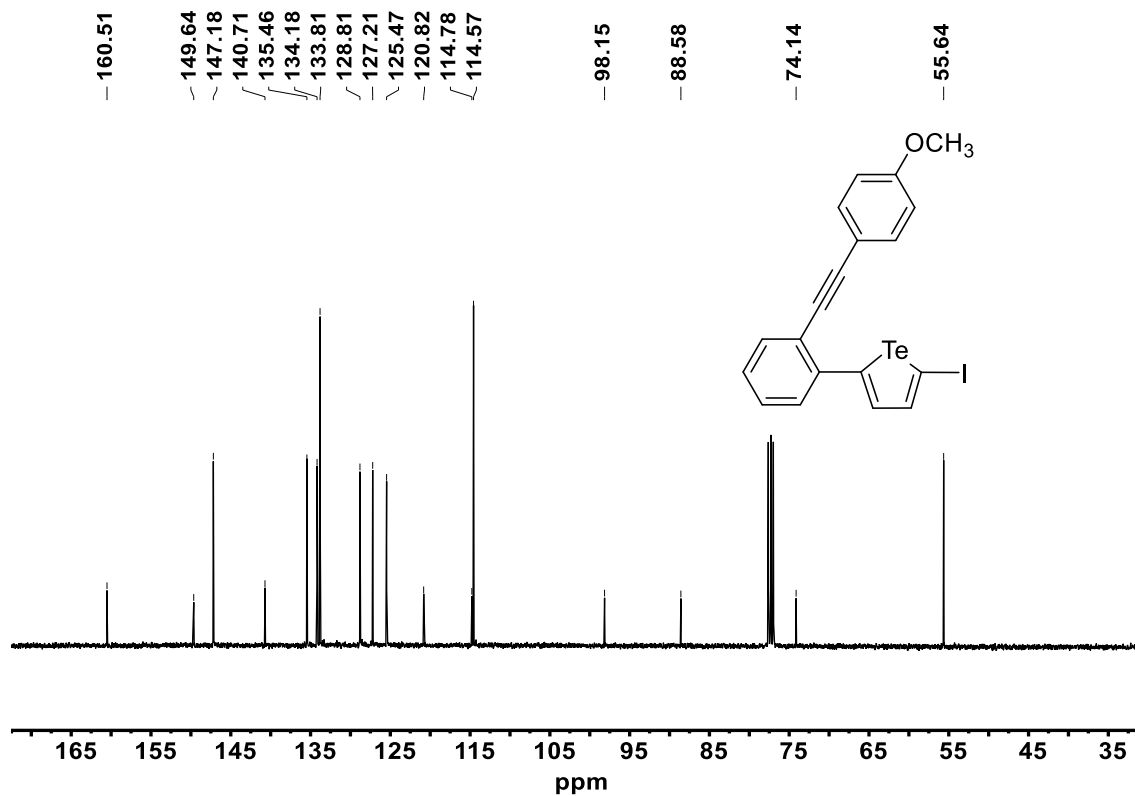

Figure S39.  $^1\text{H}$  NMR spectrum of **3m** in  $\text{CDCl}_3$ .

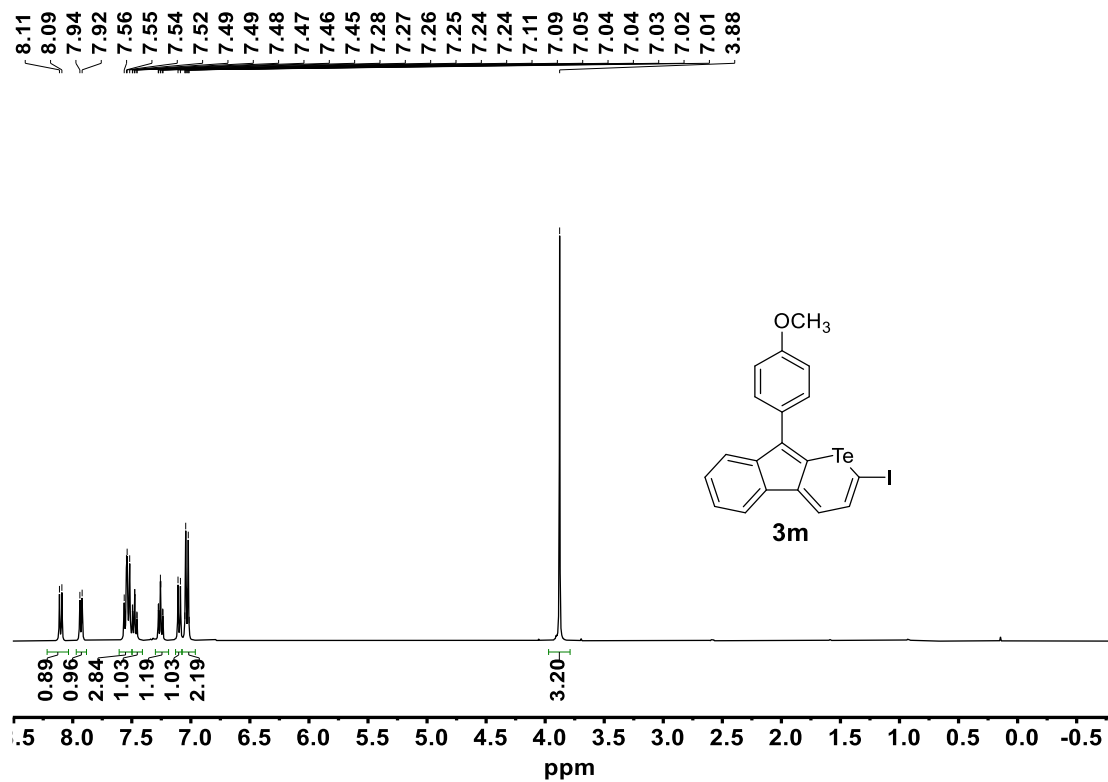

Figure S40.  $^{13}\text{C}$  NMR spectrum of **3m** in  $\text{CDCl}_3$ .

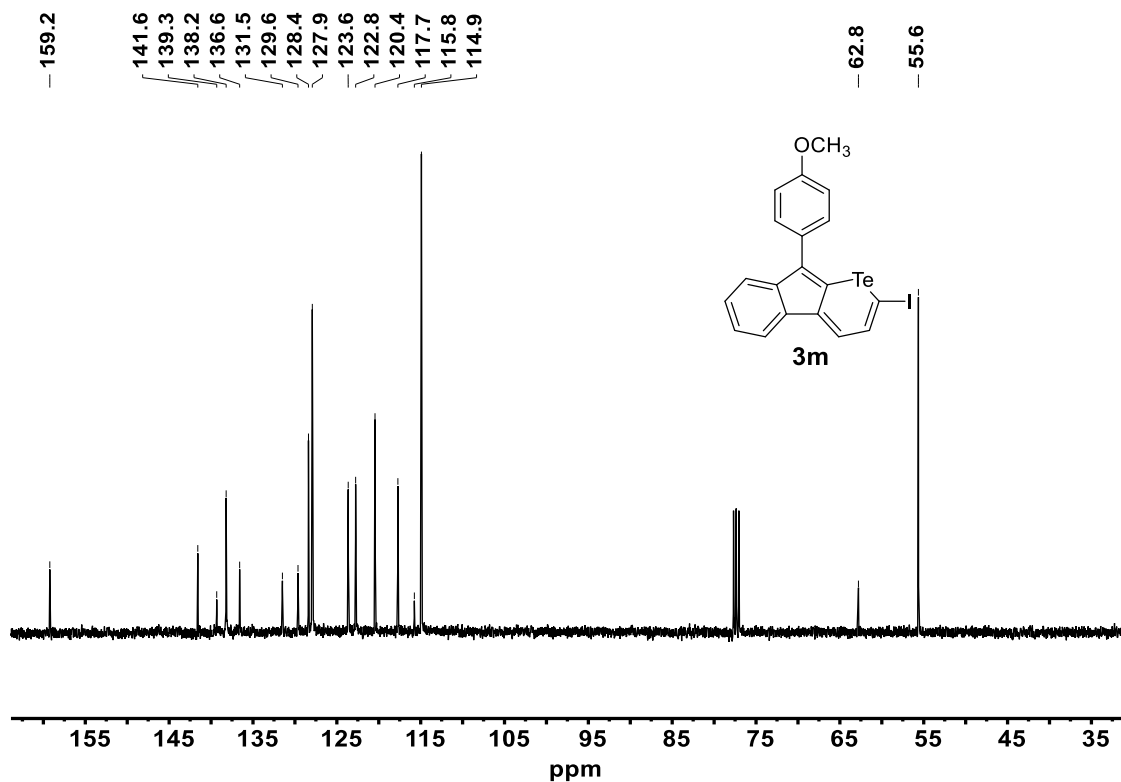



Figure S41.  $^1\text{H}$  NMR spectrum of **2n** in  $\text{CDCl}_3$

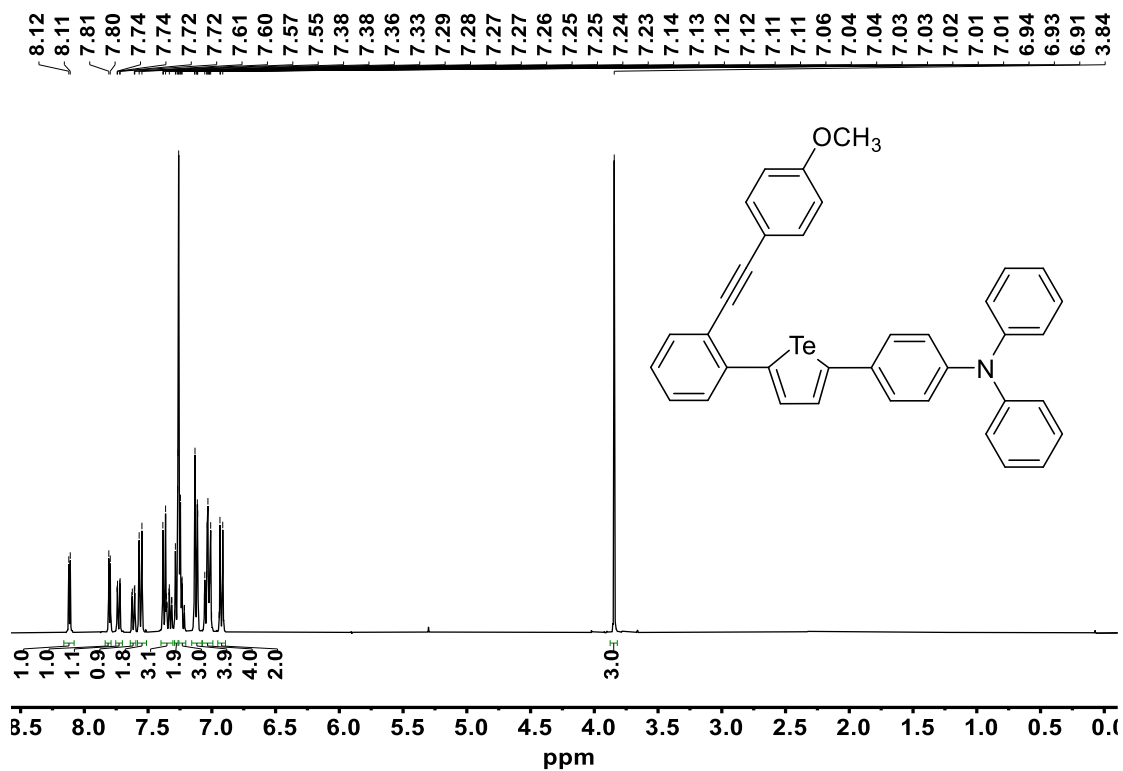

Figure S42.  $^{13}\text{C}$  NMR spectrum of **2n** in  $\text{CDCl}_3$ .

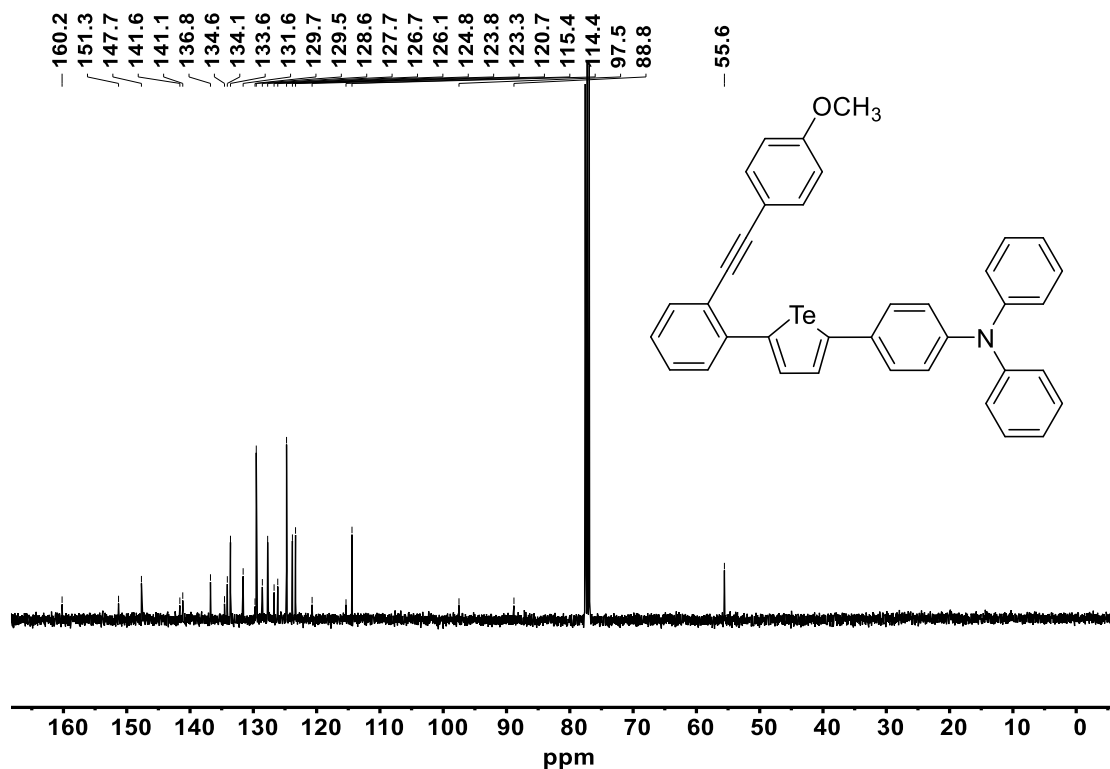

Figure S43.  $^1\text{H}$  NMR spectrum of **3n** in  $\text{CDCl}_3$ .

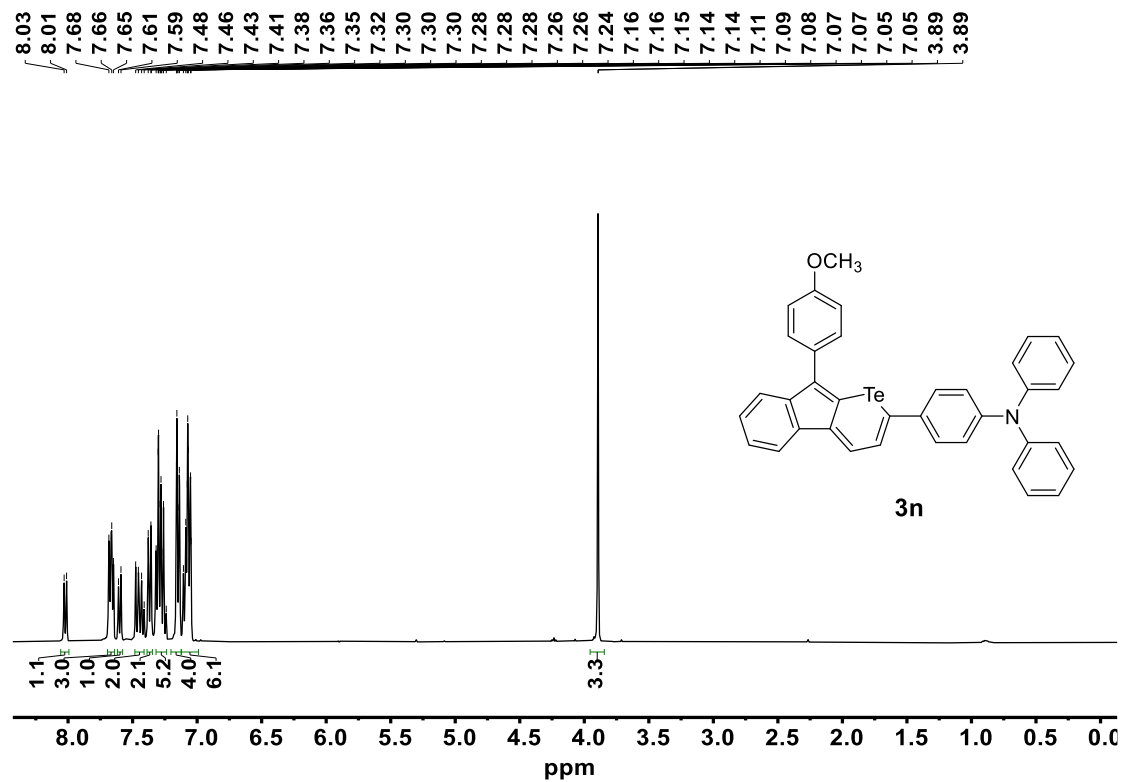

Figure S44.  $^{13}\text{C}$  NMR spectrum of **3n** in  $\text{CDCl}_3$ .

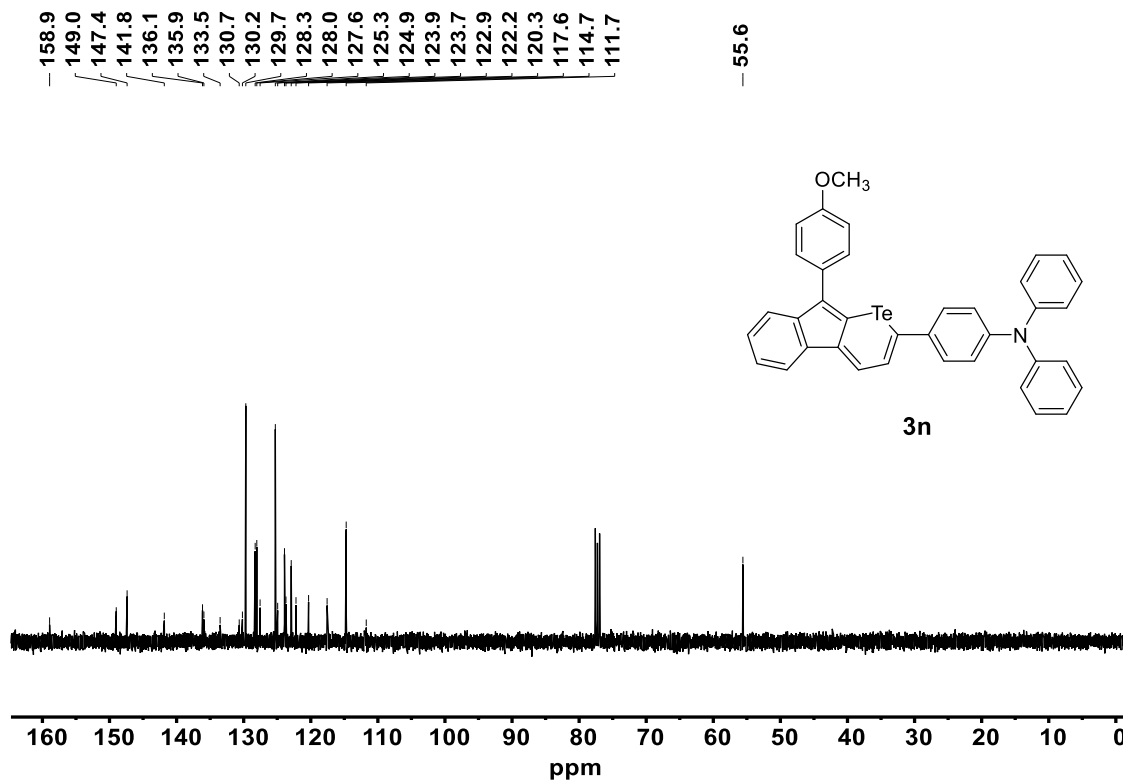

Figure S45.  $^1\text{H}$  NMR spectrum of  $3\text{d}\cdot\text{I}_2$  in  $\text{CDCl}_3$ .

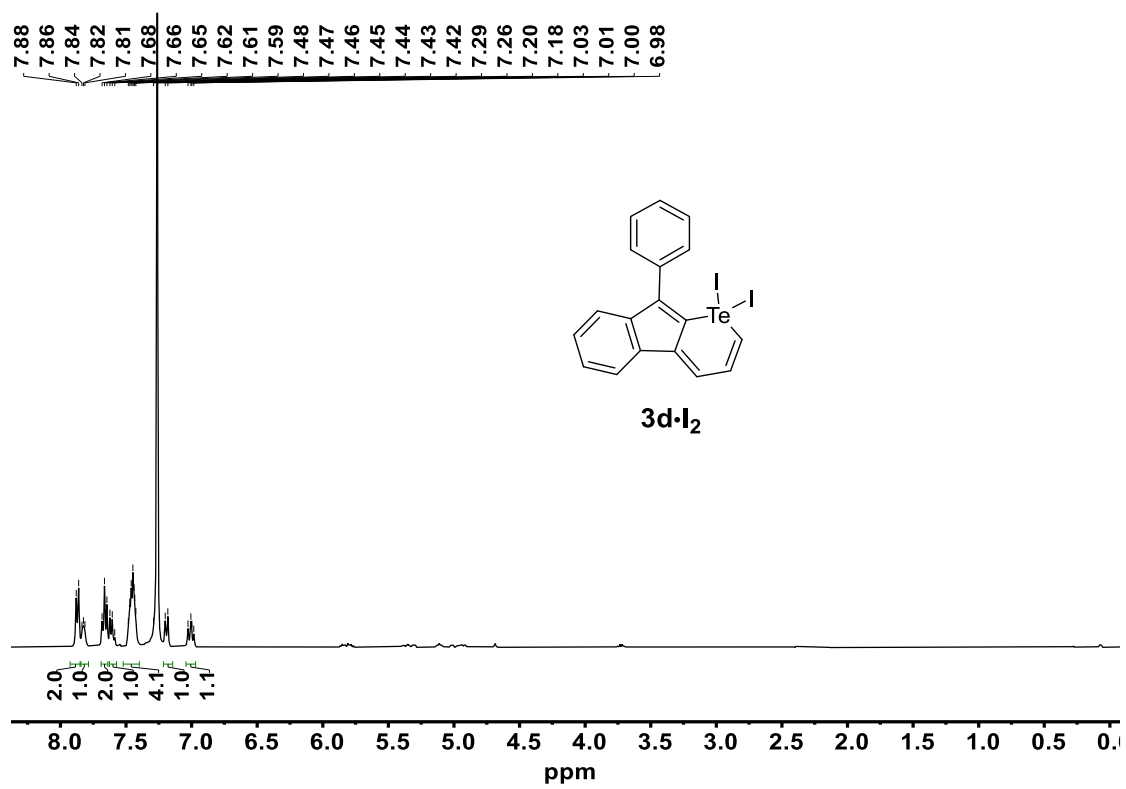

Figure S46.  $^1\text{H}$  NMR spectrum of **4a** in  $\text{DMSO-}d_6$ .

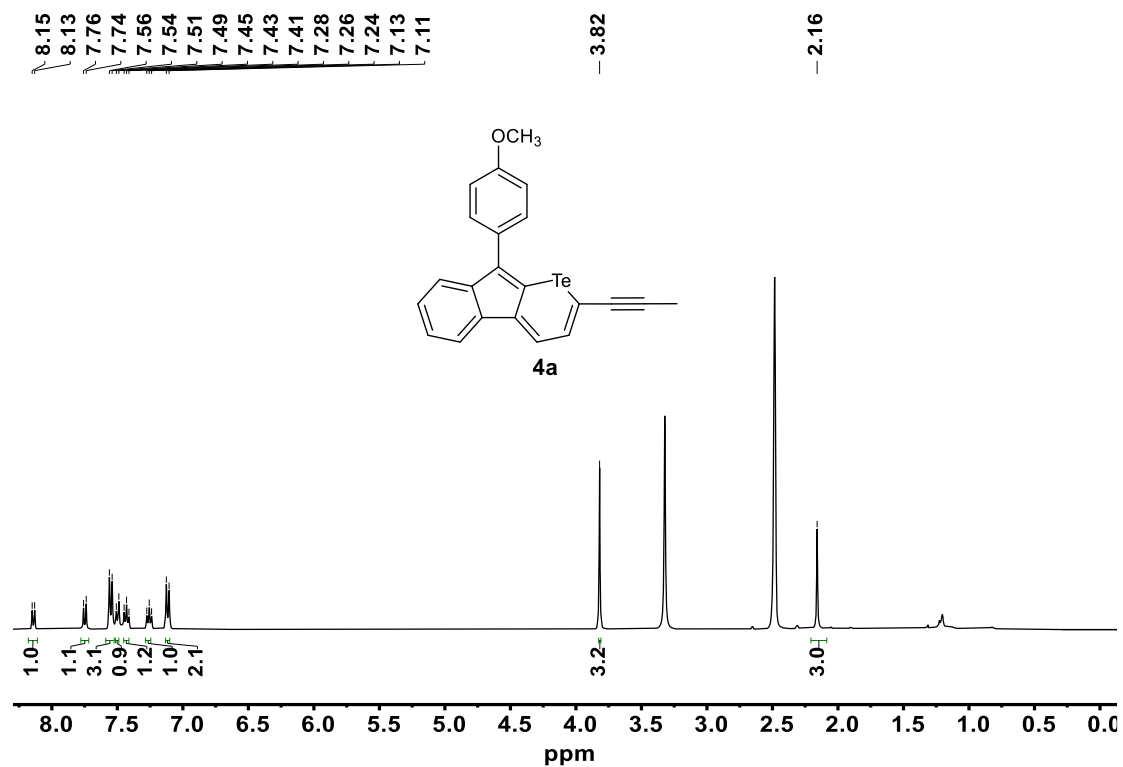

Figure S47.  $^{13}\text{C}$  NMR spectrum of **4a** in  $\text{DMSO-}d_6$ .

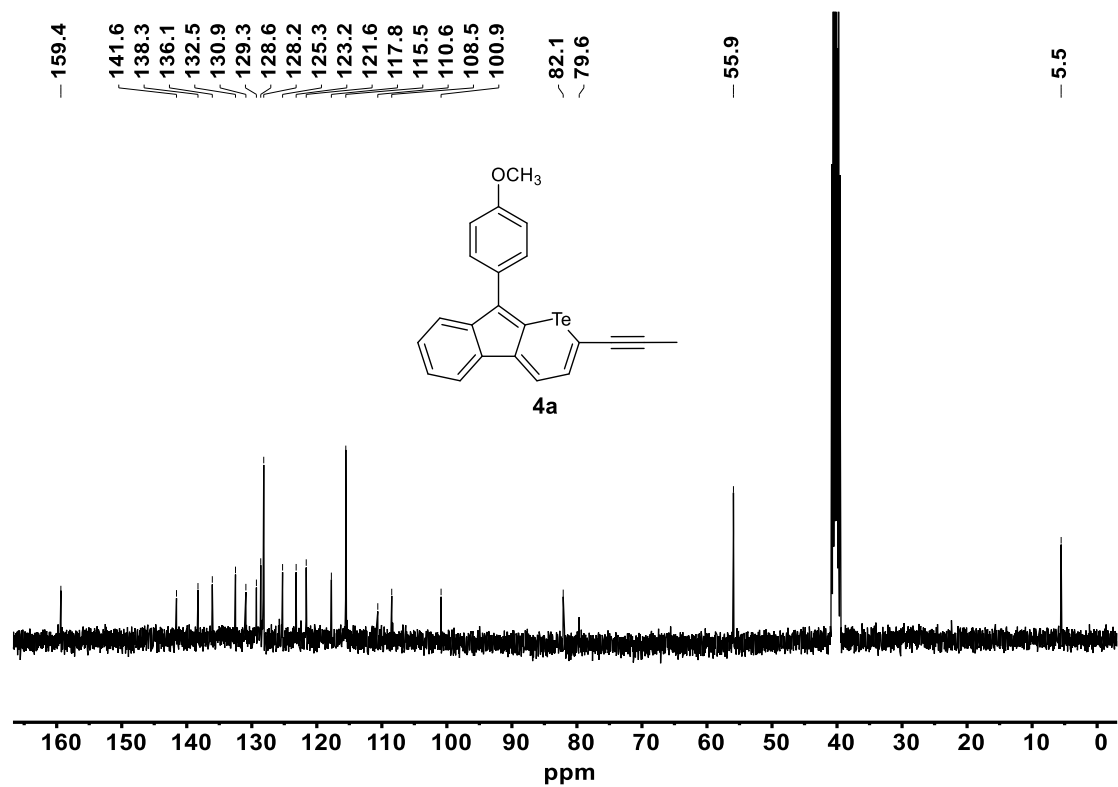

Figure S48.  $^1\text{H}$  NMR spectrum of **4b** in  $\text{CDCl}_3$ .

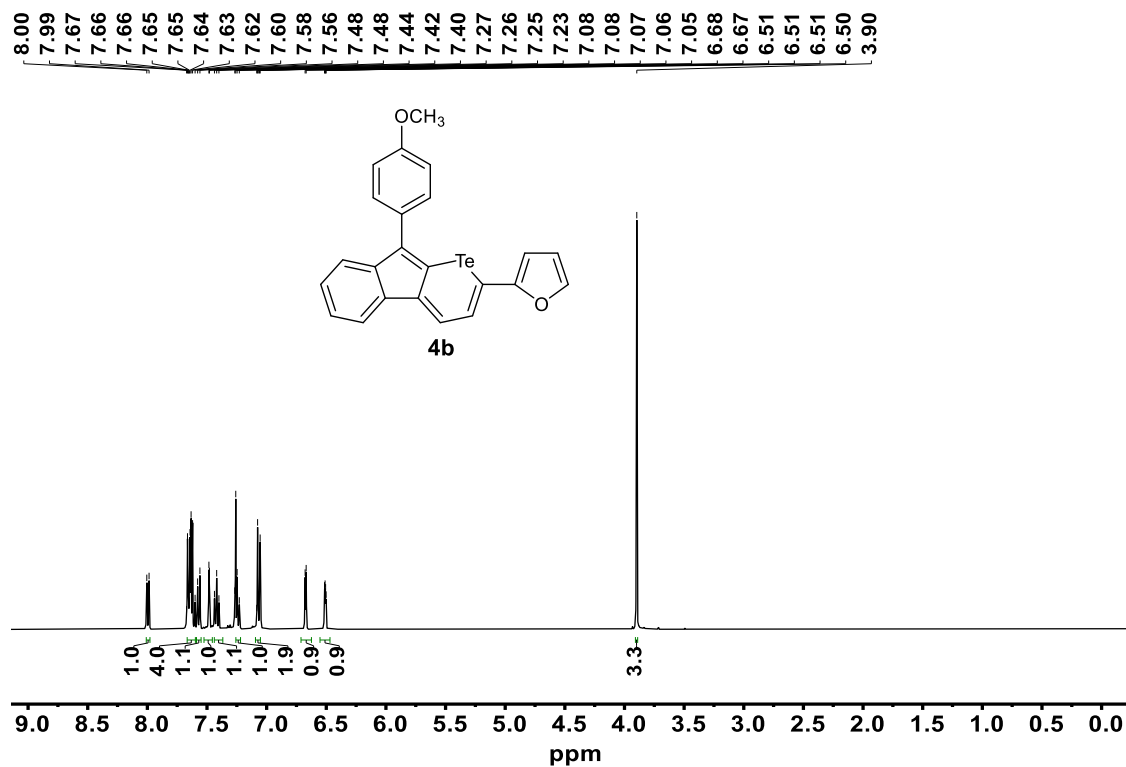

Figure S49.  $^{13}\text{C}$  NMR spectrum of **4b** in  $\text{CDCl}_3$ .

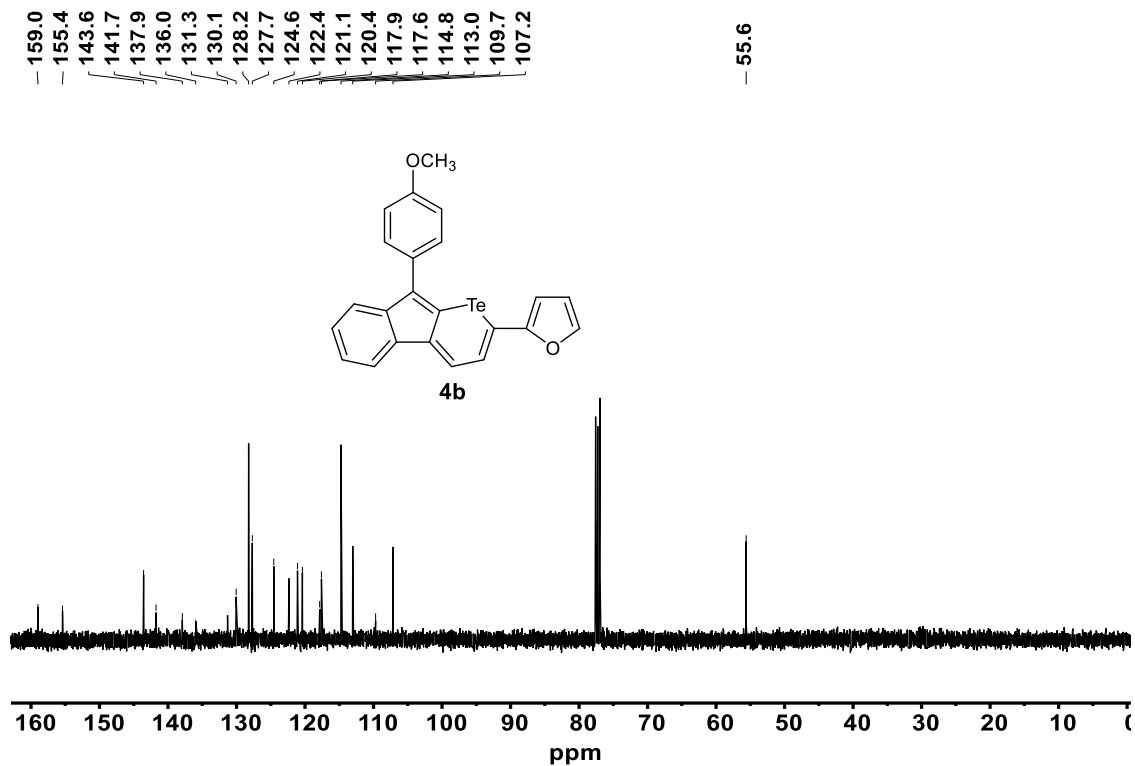

Figure S50.  $^1\text{H}$  NMR spectrum of **4c** in  $\text{DMSO-}d_6$ .

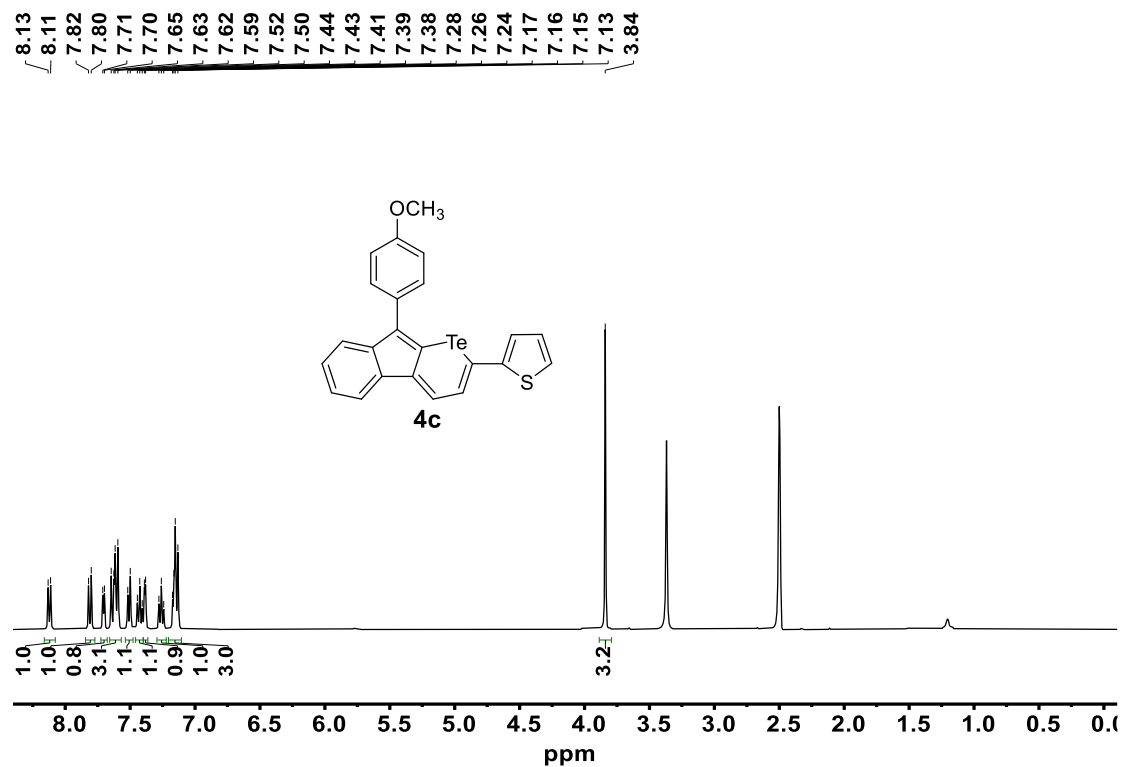

Figure S51.  $^{13}\text{C}$  NMR spectrum of **4c** in  $\text{DMSO-}d_6$ .

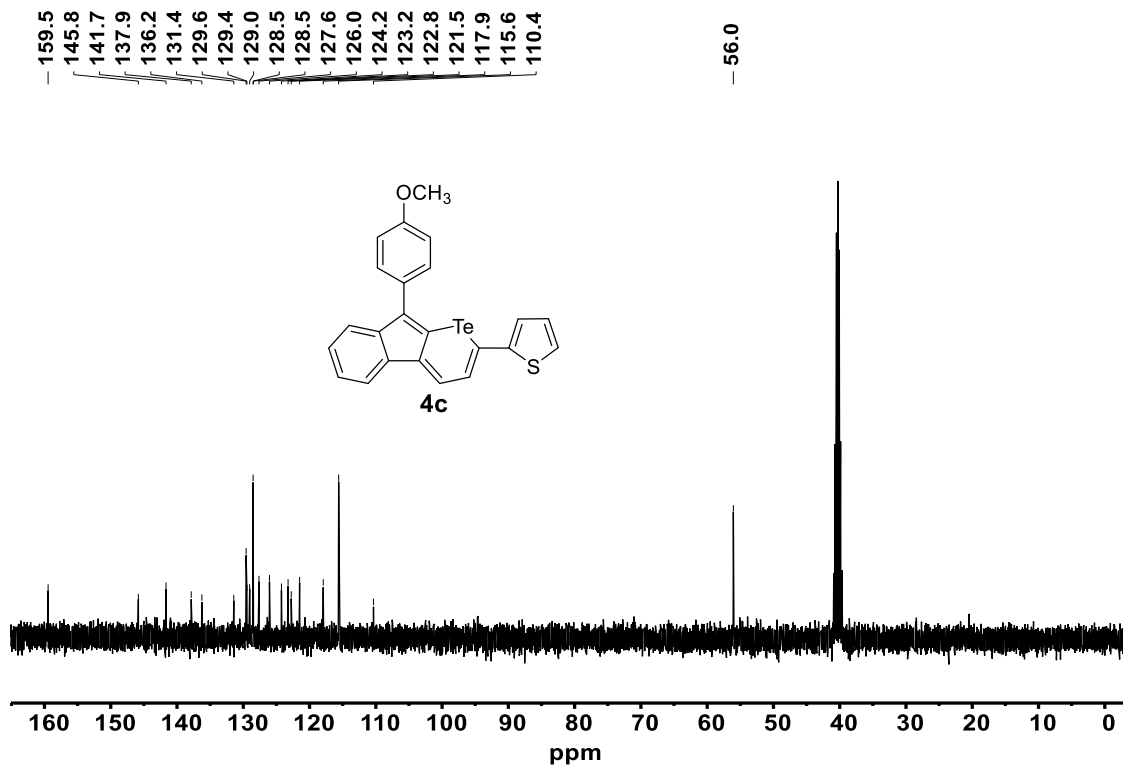

Figure S52.  $^1\text{H}$  NMR spectrum of **4d** in  $\text{DMSO-}d_6$ .

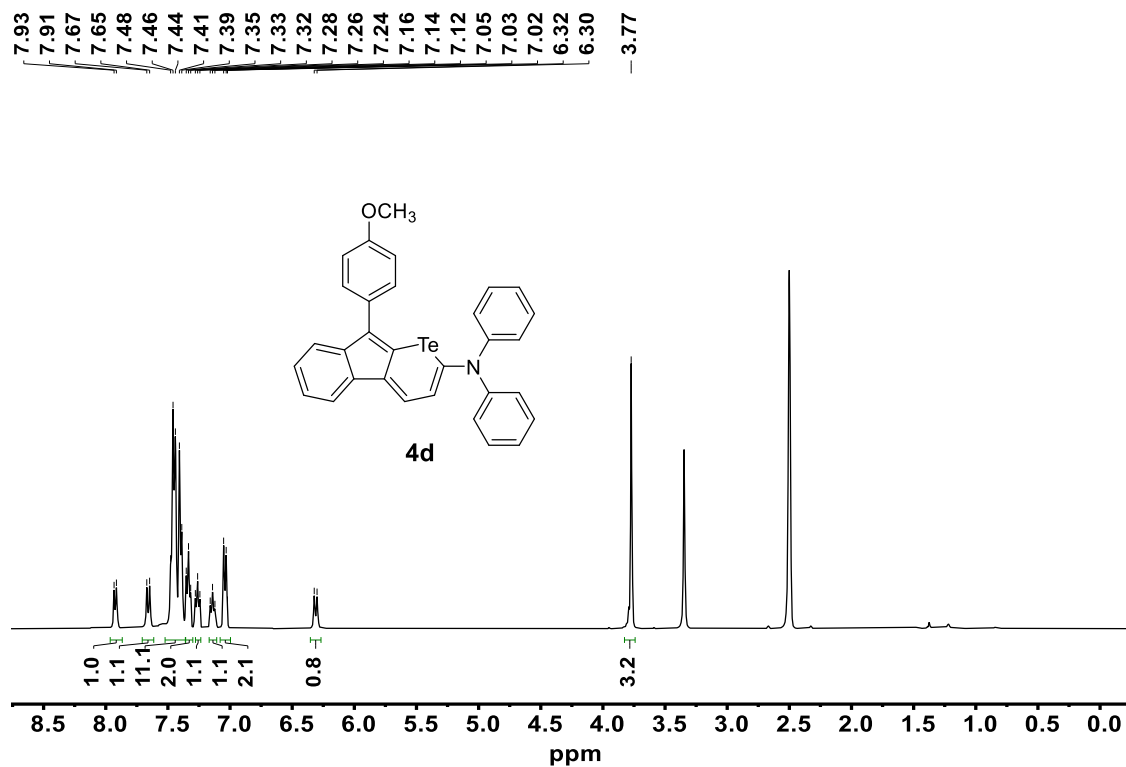

Figure S53.  $^{13}\text{C}$  NMR spectrum of **4d** in  $\text{DMSO-}d_6$ .

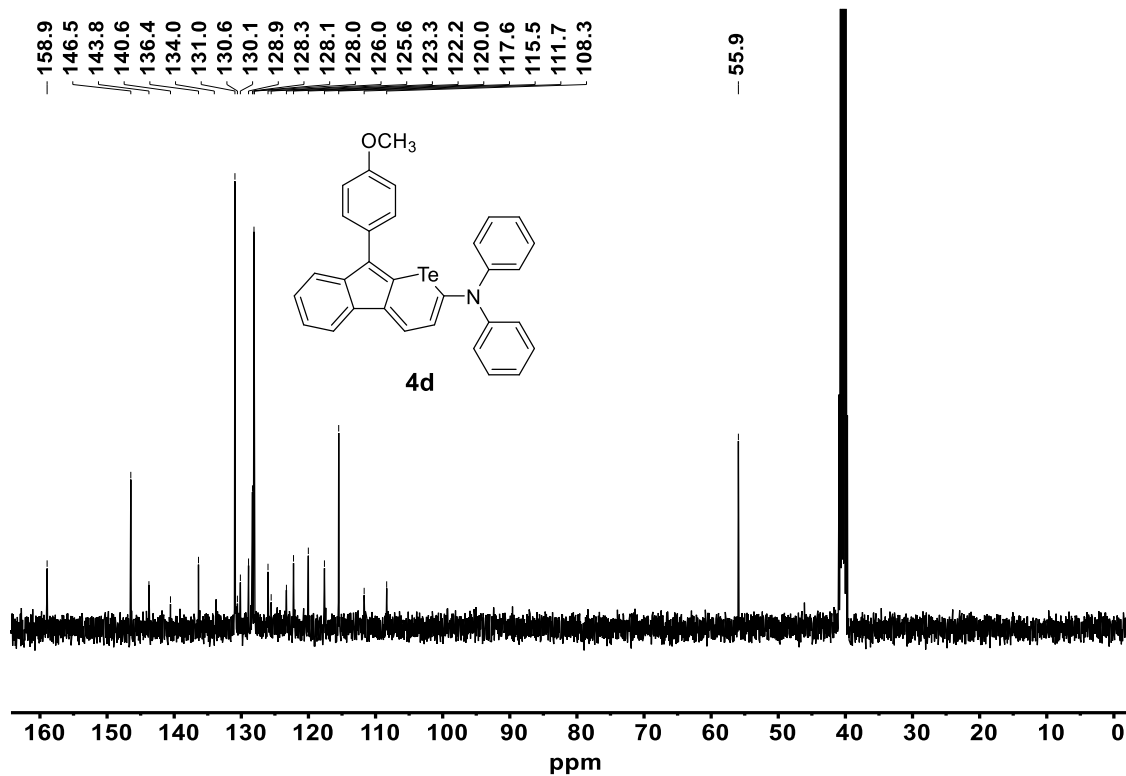

Figure S54.  $^1\text{H}$  NMR spectrum of **4e** in  $\text{CDCl}_3$ .

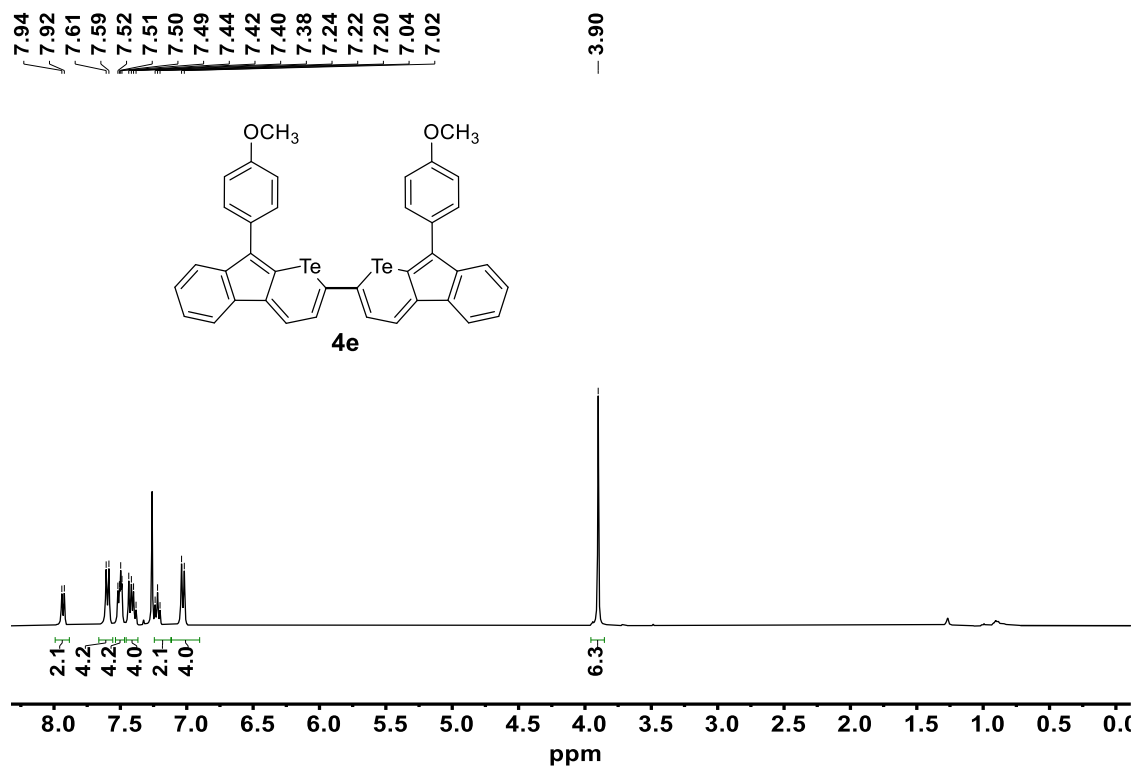

Figure S55.  $^{13}\text{C}$  NMR spectrum of **4e** in  $\text{CDCl}_3$ .

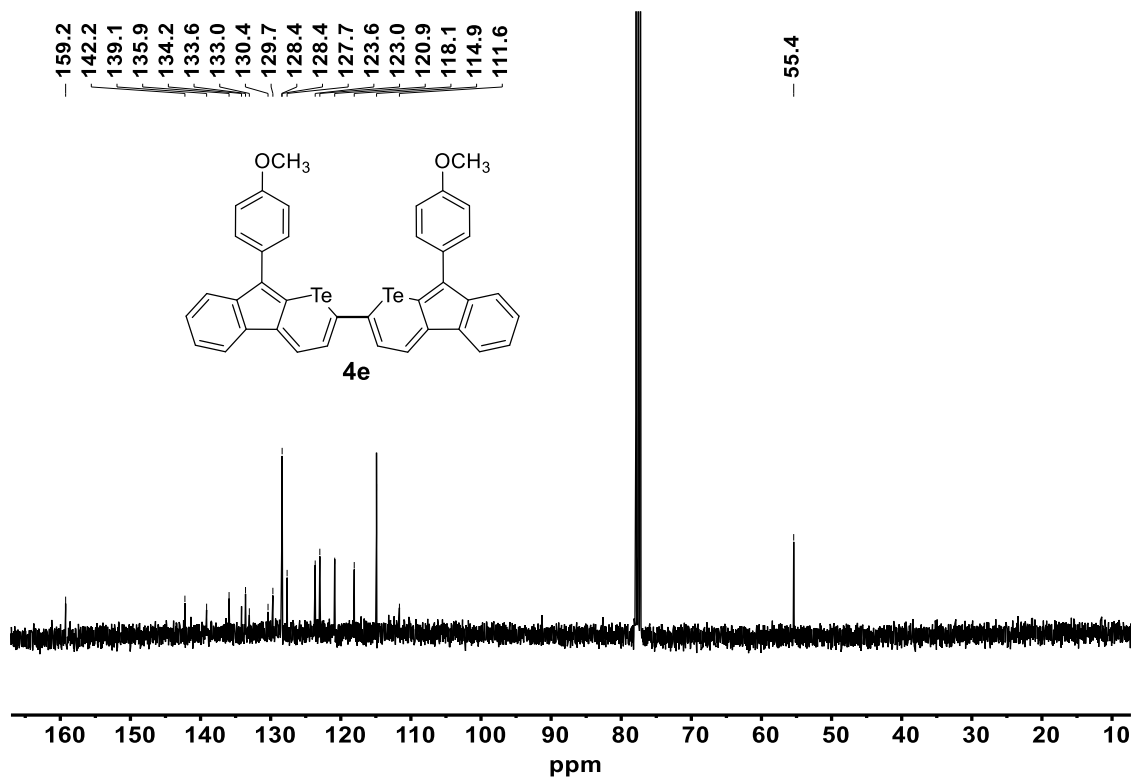



Figure S56.  $^1\text{H}$  NMR spectrum of **4f** in  $\text{DMSO-}d_6$ .

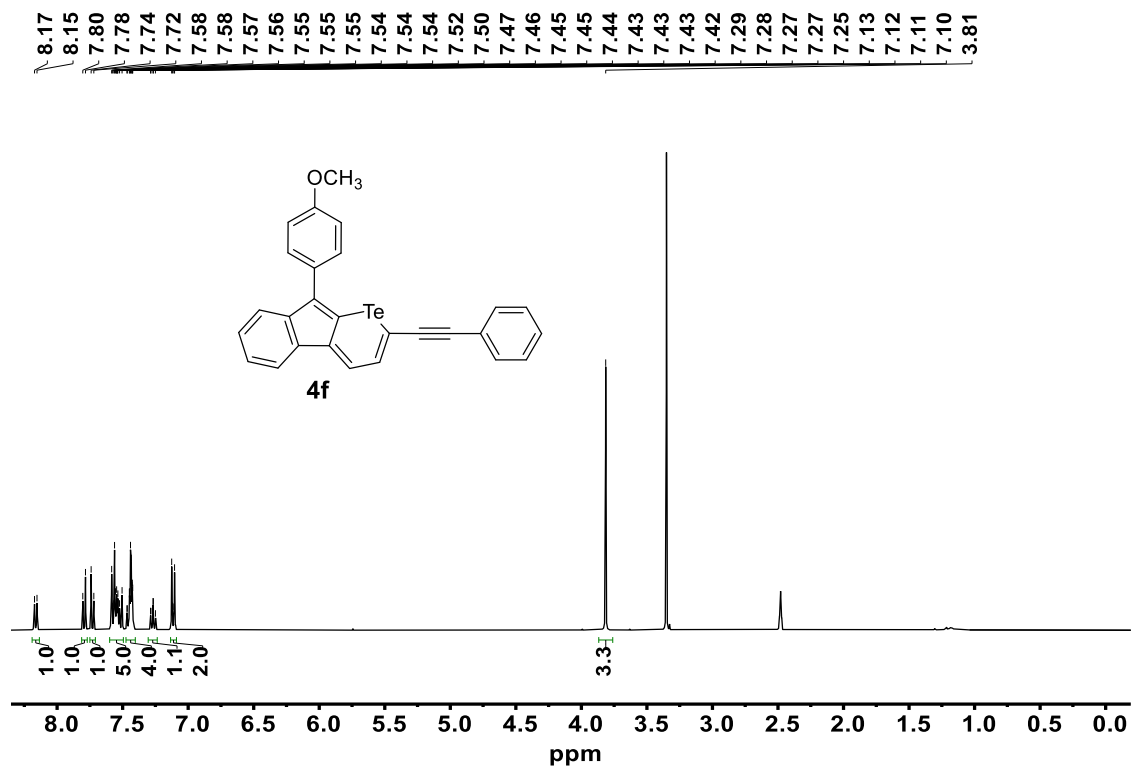

Figure S57.  $^{13}\text{C}$  NMR spectrum of **4f** in  $\text{DMSO-}d_6$ .

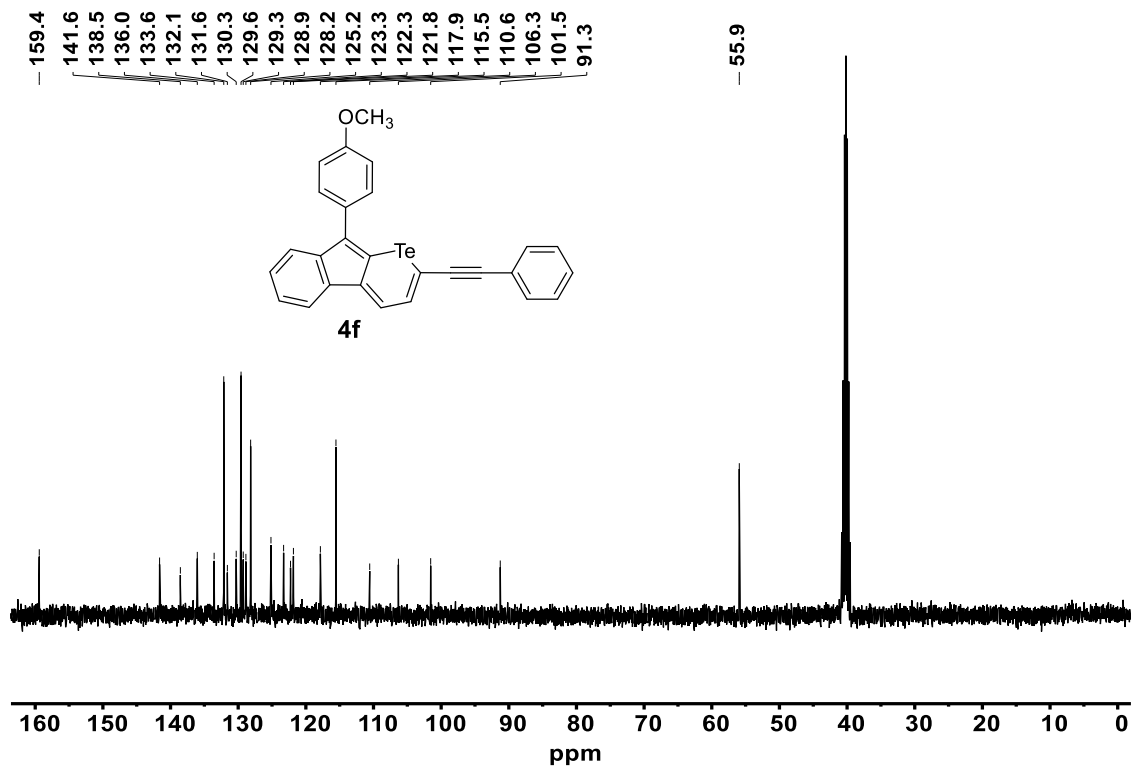

## References.

- S1 a) Schaefer, W. P.; Lyon, D. K.; Labinger, J. A.; Bercaw, J. E., A Platinum Chloro (Fluoroaryl)Phosphine Complex. *Acta Crystallogr C* **1992**, *48*, 1582-1584; b) Kemmitt, R. D. W.; Nichols, D. I.; Peacock, R. D., Trispentafluorophenylphosphine Complexes of Rhodium Palladium and Platinum. *Chem Commun* **1967**, 599.
- S2 a) Lu, Y.; Qiao, Y.; Xue, H.; Zhou, G., From Colorless to Near-Infrared S-Heteroarene Isomers: Unexpected Cycloaromatization of Cyclopenta[*b*]thiopyran Catalyzed by PtCl<sub>2</sub>. *Org. Lett.* **2018**, *20*, 6632-6635; b) Jahnke, A. A.; Howe, G. W.; Seferos, D. S., Polytellurophenes with Properties Controlled by Tellurium-Coordination. *Angew. Chem. Int. Ed.* **2010**, *49* (52), 10140-10144.
- S3 *Gaussian 16, Revision C.01*, M. J. Frisch, G. W. Trucks, H. B. Schlegel, G. E. Scuseria, M. A. Robb, J. R. Cheeseman, G. Scalmani, V. Barone, G. A. Petersson, H. Nakatsuji, X. Li, M. Caricato, A. V. Marenich, J. Bloino, B. G. Janesko, R. Gomperts, B. Mennucci, H. P. Hratchian, J. V. Ortiz, A. F. Izmaylov, J. L. Sonnenberg, D. Williams-Young, F. Ding, F. Lipparini, F. Egidi, J. Goings, B. Peng, A. Petrone, T. Henderson, D. Ranasinghe, V. G. Zakrzewski, J. Gao, N. Rega, G. Zheng, W. Liang, M. Hada, M. Ehara, K. Toyota, R. Fukuda, J. Hasegawa, M. Ishida, T. Nakajima, Y. Honda, O. Kitao, H. Nakai, T. Vreven, K. Throssell, J. A. Montgomery, Jr., J. E. Peralta, F. Ogliaro, M. J. Bearpark, J. J. Heyd, E. N. Brothers, K. N. Kudin, V. N. Staroverov, T. A. Keith, R. Kobayashi, J. Normand, K. Raghavachari, A. P. Rendell, J. C. Burant, S. S. Iyengar, J. Tomasi, M. Cossi, J. M. Millam, M. Klene, C. Adamo, R. Cammi, J. W. Ochterski, R. L. Martin, K. Morokuma, O. Farkas, J. B. Foresman, and D. J. Fox, Gaussian, Inc., Wallingford CT, **2019**.
- S4 Chai, J. D.; Head-Gordon, M., Long-range corrected hybrid density functionals with damped atom-atom dispersion corrections. *Phys. Chem. Chem. Phys.* **2008**, *10*, 6615-6620.

- S5 Neese, F.; Wennmohs, F.; Becker, U.; Riplinger, C., The ORCA quantum chemistry program package. *J Chem Phys* **2020**, *152*, 224108.
- S6 Mardirossian, N.; Head-Gordon, M., omegaB97M-V: A combinatorially optimized, range-separated hybrid, meta-GGA density functional with VV10 nonlocal correlation. *J. Chem. Phys.* **2016**, *144*, 214110.
- S7 Weigend, F.; Ahlrichs, R., Balanced basis sets of split valence, triple zeta valence and quadruple zeta valence quality for H to Rn: Design and assessment of accuracy. *Phys. Chem. Chem. Phys.* **2005**, *7*, 3297-3305
- S8 Marenich, A. V.; Cramer, C. J.; Truhlar, D. G., Universal solvation model based on solute electron density and on a continuum model of the solvent defined by the bulk dielectric constant and atomic surface tensions. *J. Phys. Chem. B.* **2009**, *113*, 6378-6396.
- S9 CYLview20; C. Y. Legault, Université de Sherbrooke, **2020** (<http://www.cylview.org>).
